# Supplementary material for: Role of halogen effects and cyclic imide groups in constructing red and near-infrared room temperature phosphorescence molecules: theoretical perspective and molecular design
Source: Royal Society of Chemistry journal article supplement (doi:10.1039/d2cp05743c), 2023-01-01
Supplement: d2cp05743c1.pdf [file d2cp05743c1.pdf]

### *Supplementary Information*

The role of halogen effects and cyclic imide groups in constructing red and near-infrared room temperature phosphorescence molecules: Theoretical perspective and molecular design

Qingfang Mu<sup>1</sup>, Kai Zhang<sup>1</sup>, Huanling Liu<sup>1</sup>, Zhen Xie<sup>1</sup>, Yuzhi Song<sup>1</sup>, Chuan-Kui Wang<sup>1</sup>, Lili Lin<sup>1</sup>, Yuanyuan Xu<sup>2\*</sup>, Jianzhong Fan<sup>1, 3\*</sup>

1. Shandong Province Key Laboratory of Medical Physics and Image Processing Technology, Institute of Materials and Clean Energy, School of Physics and Electronics, Shandong Normal University, Jinan 250014, China.
2. School of Science, Qilu University of Technology (Shandong Academy of Sciences), Jinan 250353, China.
3. Guangdong Provincial Key Laboratory of Luminescence from Molecular Aggregates (South China University of Technology), Guangzhou 510640, China.

#### **Corresponding Author**

\*Author to whom correspondence should be addressed.

E-mail: [fanjianzhongvip@163.com](mailto:fanjianzhongvip@163.com) and [15165131990@163.com](mailto:15165131990@163.com)

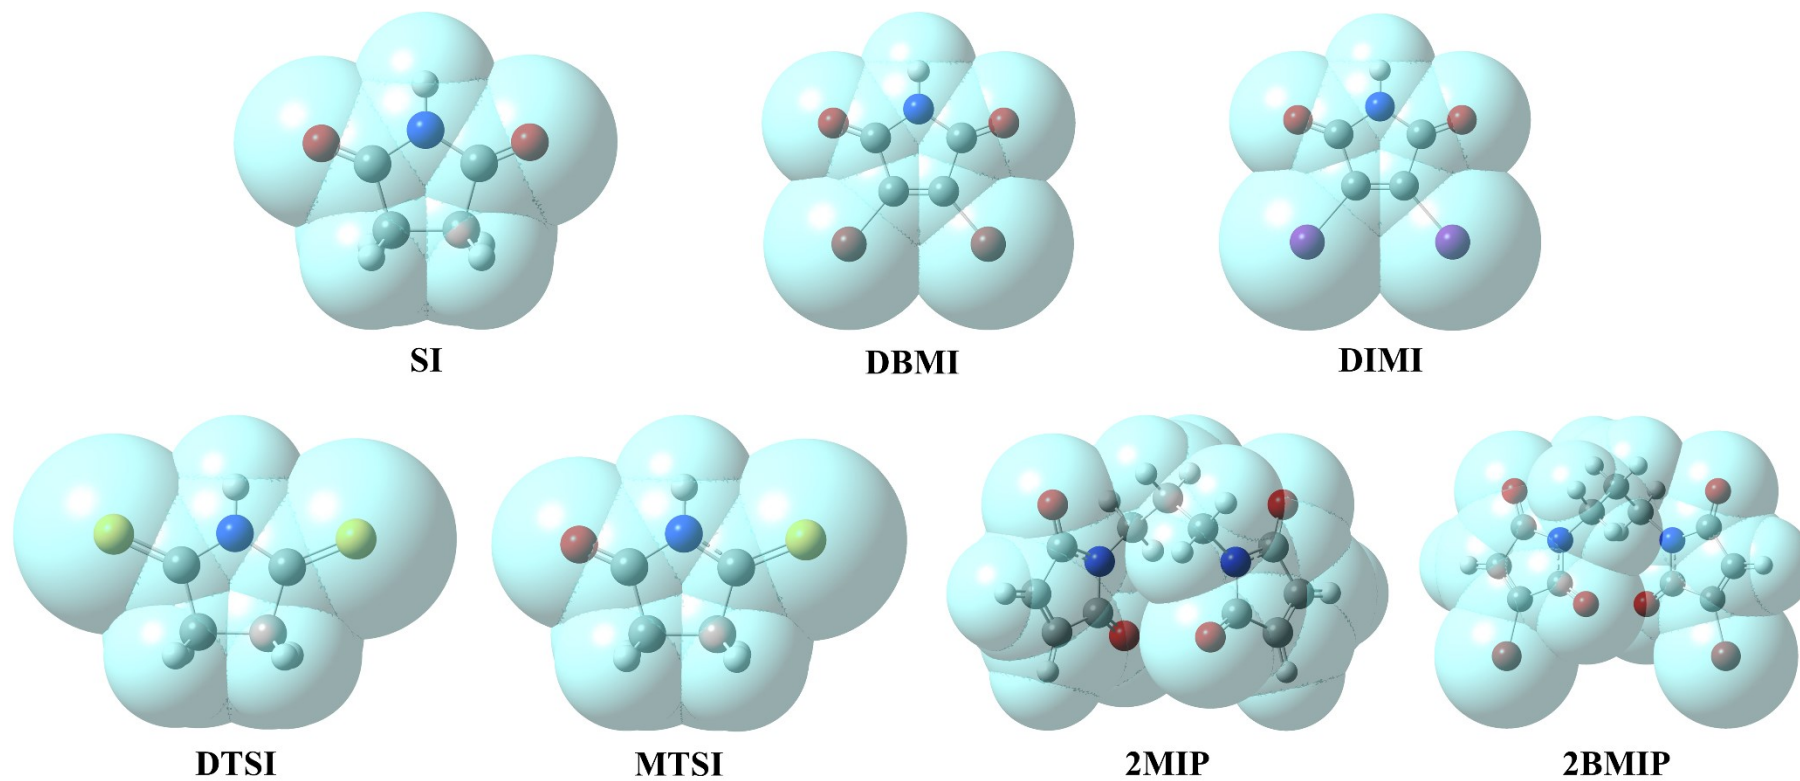

Figure S1. PCM models of SI, DBMI, DIMI, DTSI, MTSI, 2MIP, and 2BMIP in tetrahydrofuran (THF).

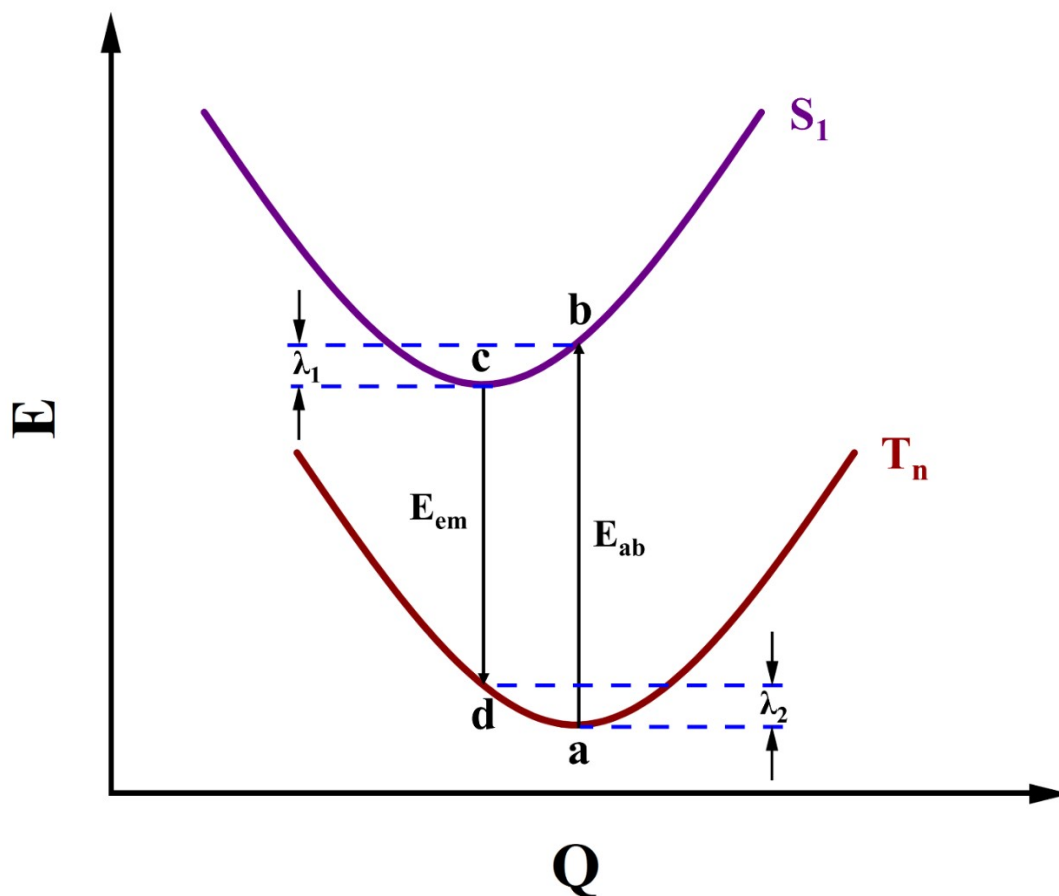

Figure S2. Schematic representation of the adiabatic potential energy surfaces (PES) for excited states.

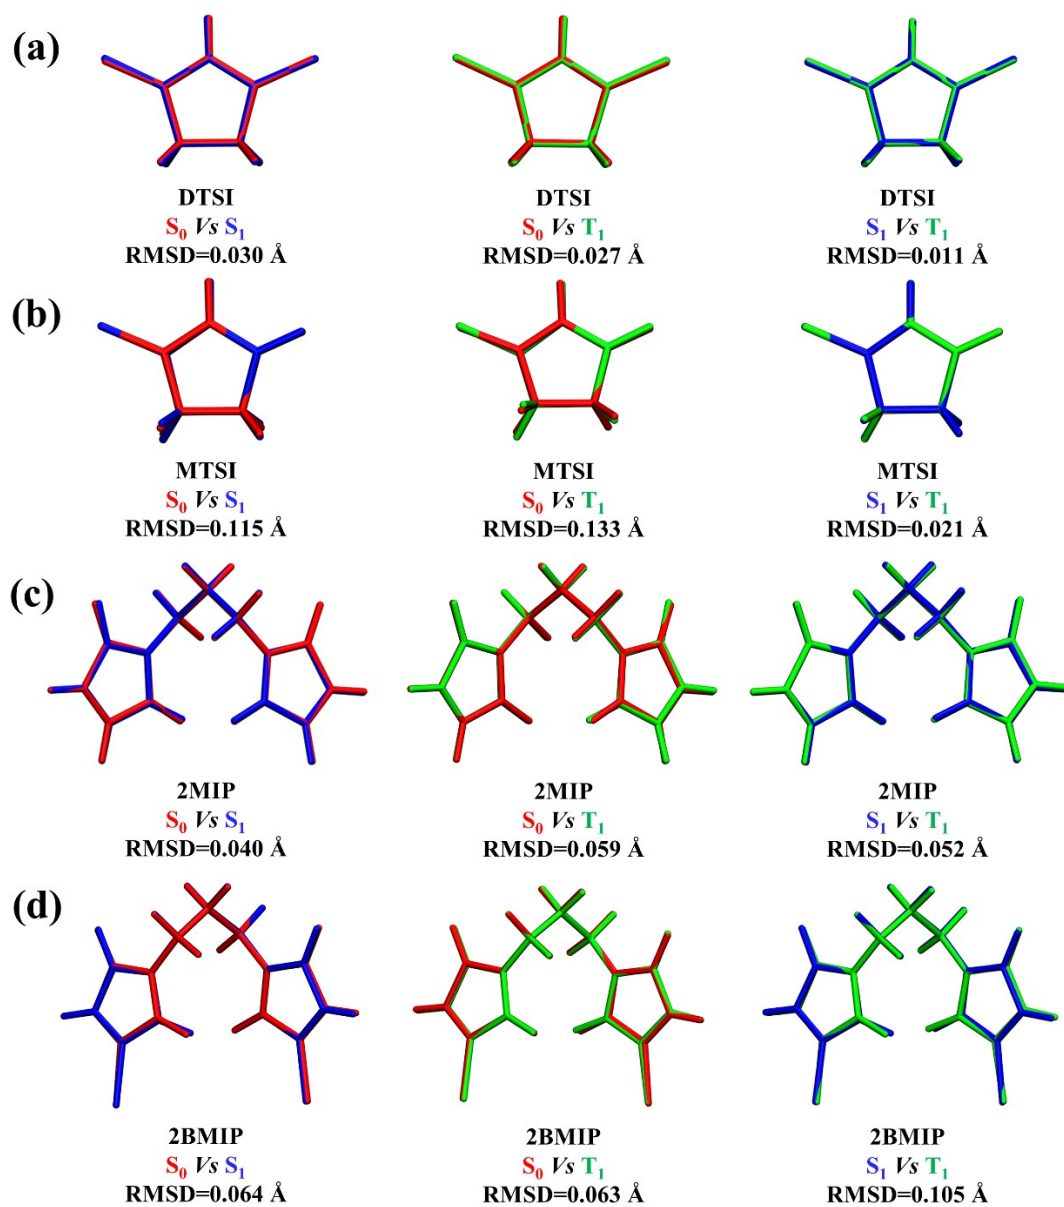

Figure S3. Geometry comparisons and RMSD values among  $S_0$  (red),  $S_1$  (blue) and  $T_1$  (green) for DTSI (a), MTSI (b), 2MIP (c) and 2BMIP (d) in solid phase.

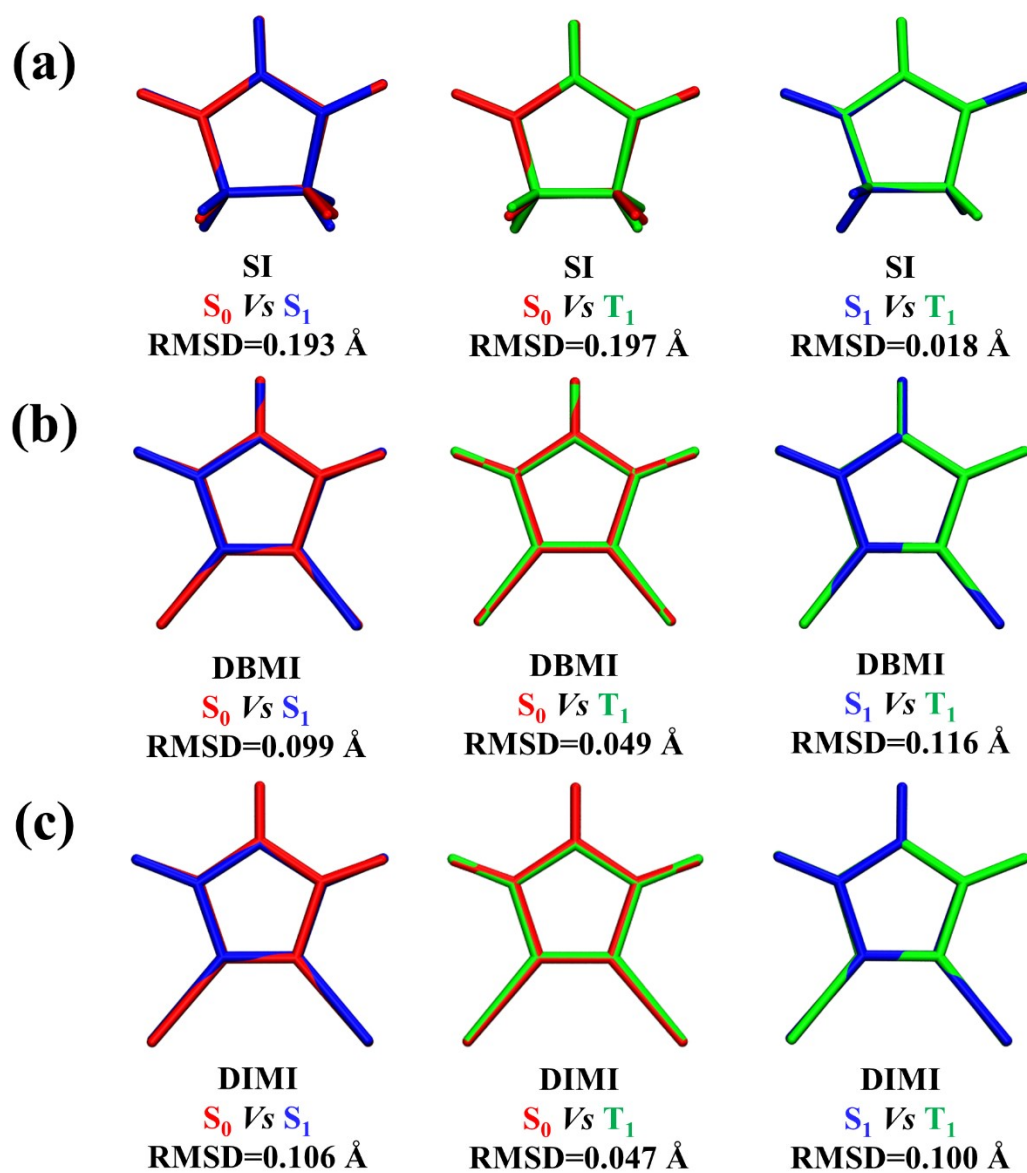

Figure S4. Geometry comparisons and RMSD values among  $S_0$  (red),  $S_1$  (blue) and  $T_1$  (green) for SI (a), DBMI (b) and DIMI (c) in THF.

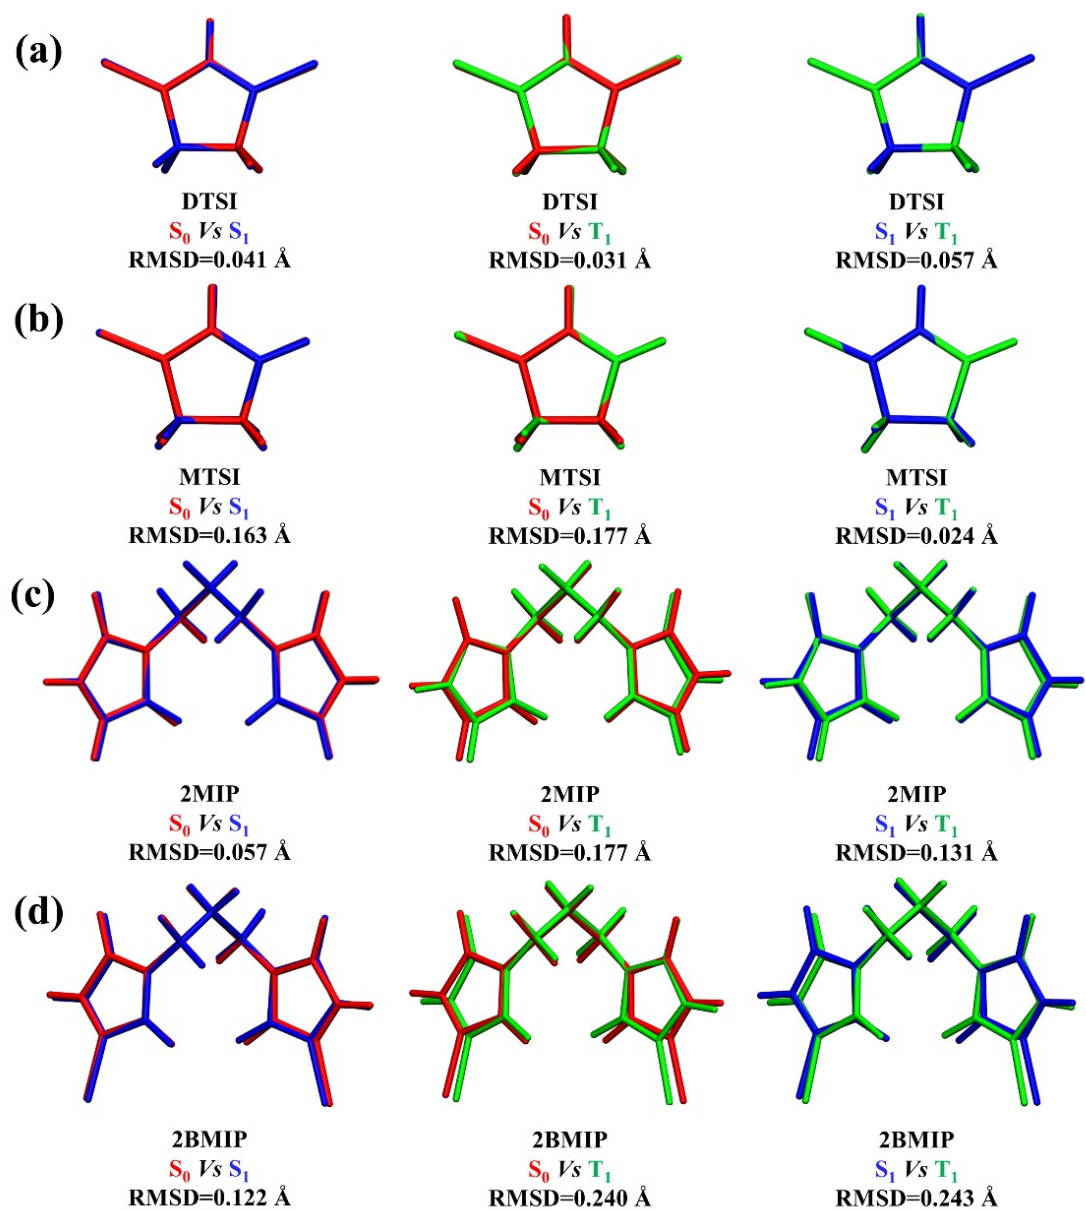

Figure S5. Geometry comparisons and RMSD values among  $S_0$  (red),  $S_1$  (blue) and  $T_1$  (green) for DTSI (a), MTSI (b), 2MIP (c) and 2BMIP (d) in THF.

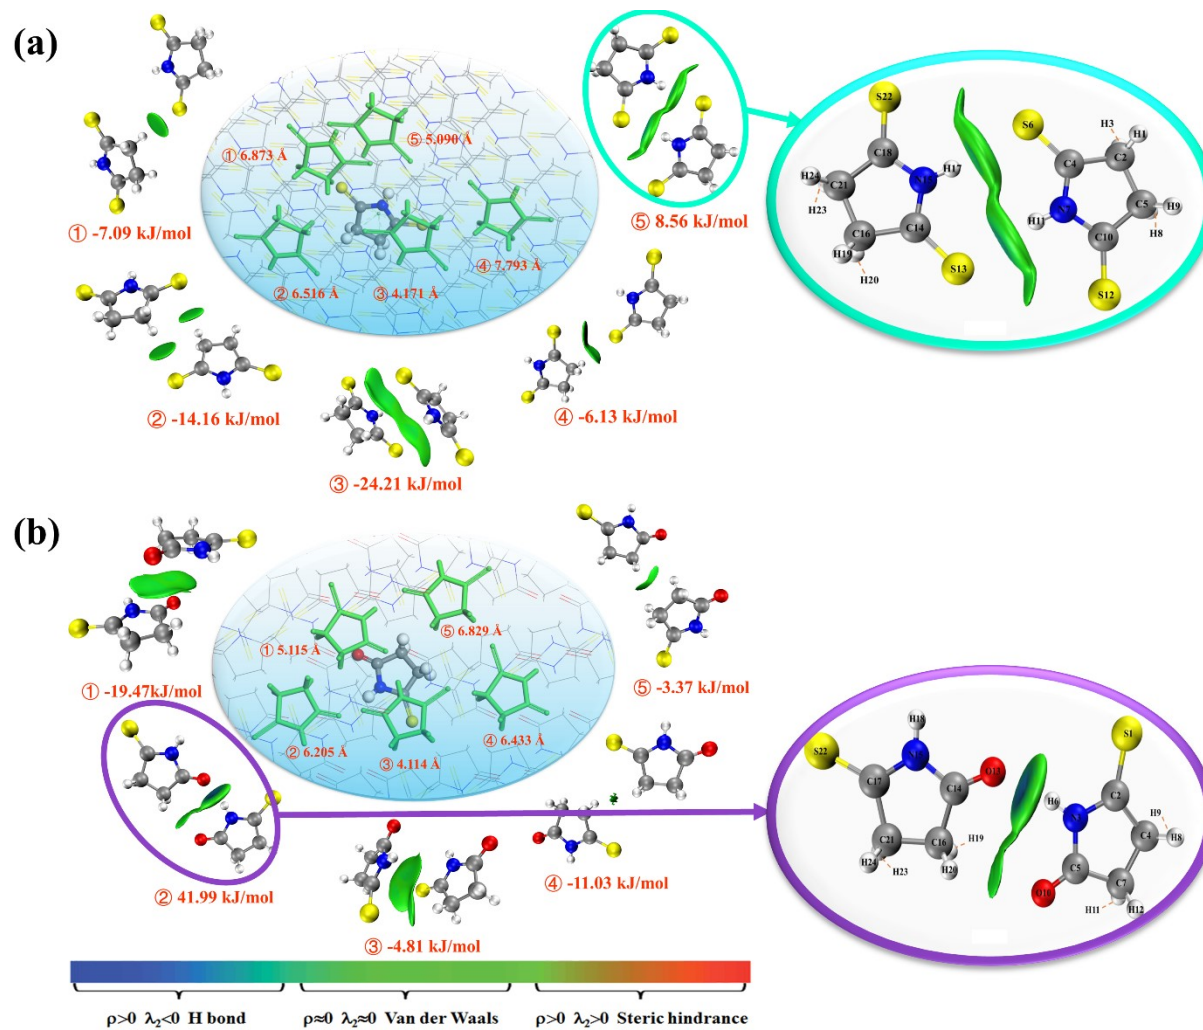

Figure S6. Intermolecular interactions for selected dimers of DTSI (a) and MTSI (b) described by IGMH method.

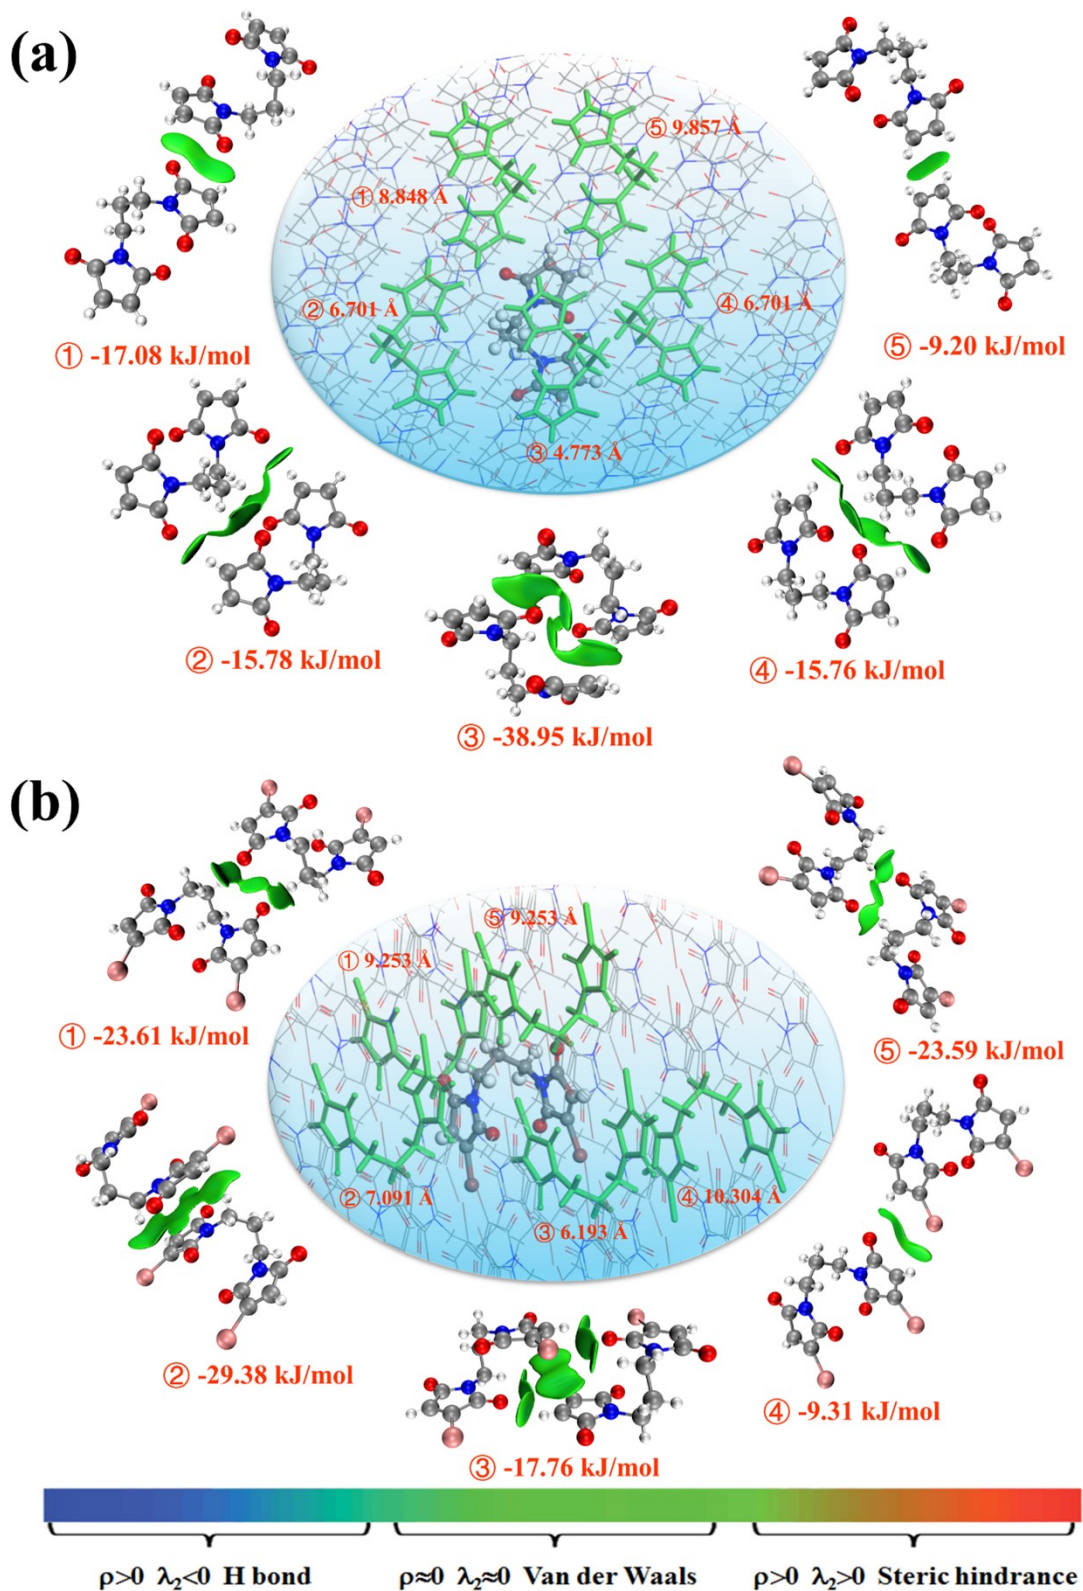

Figure S7. Intermolecular interactions for selected dimers of 2MIP (a) and 2BMIP (b) described by IGMH method.



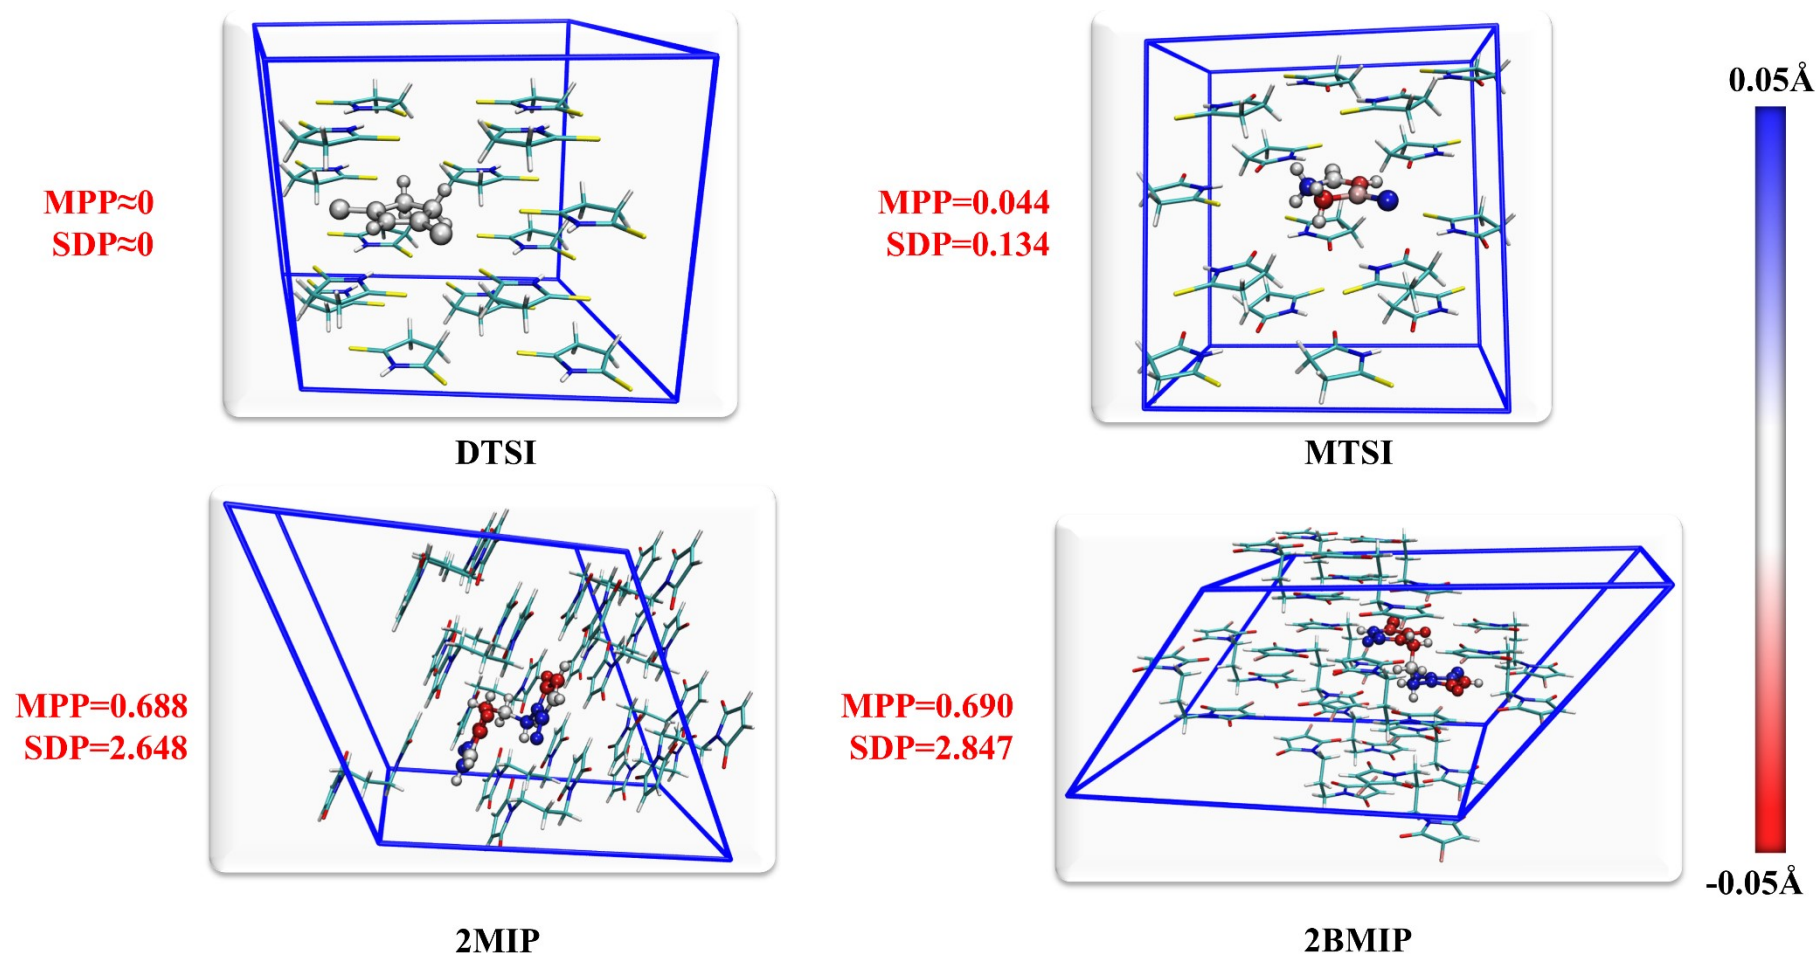

Figure S8. Molecular planarity parameters for DTSI, MTSI, 2MIP and 2BMIP in solid phase.

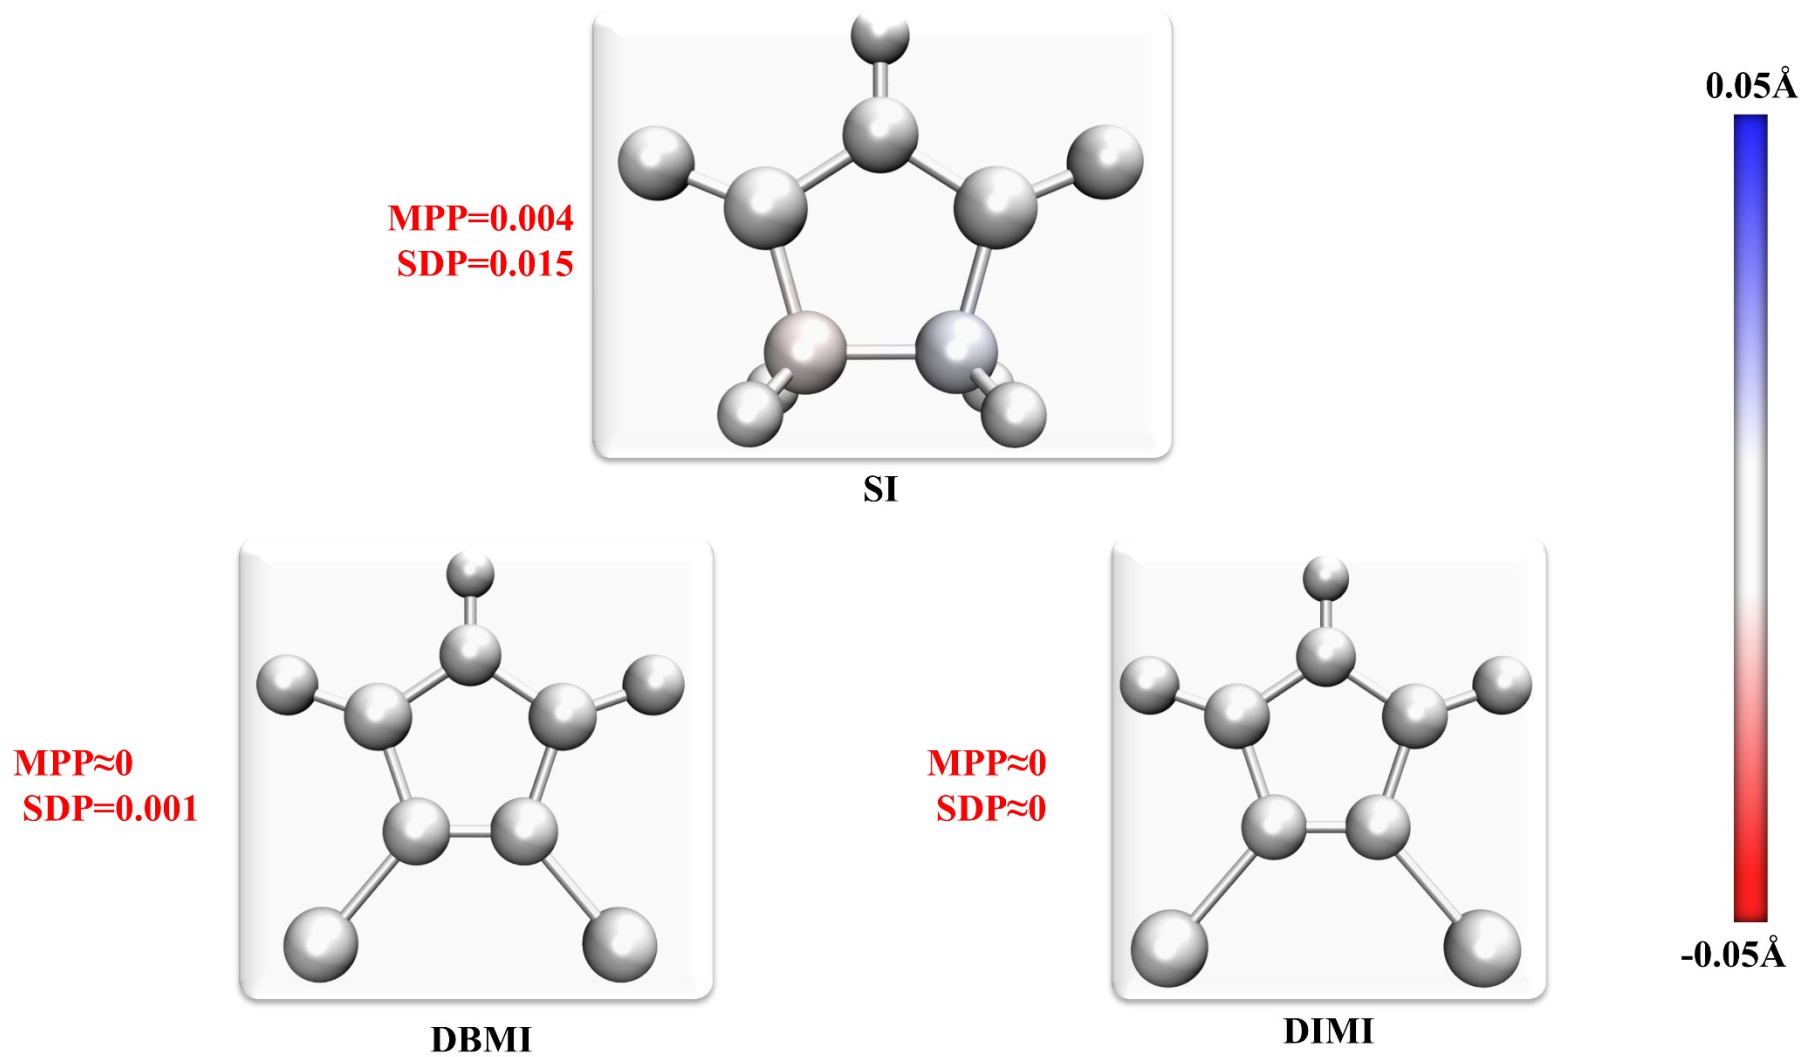

Figure S9. Molecular planarity parameters for SI, DBMI and DIMI in THF.

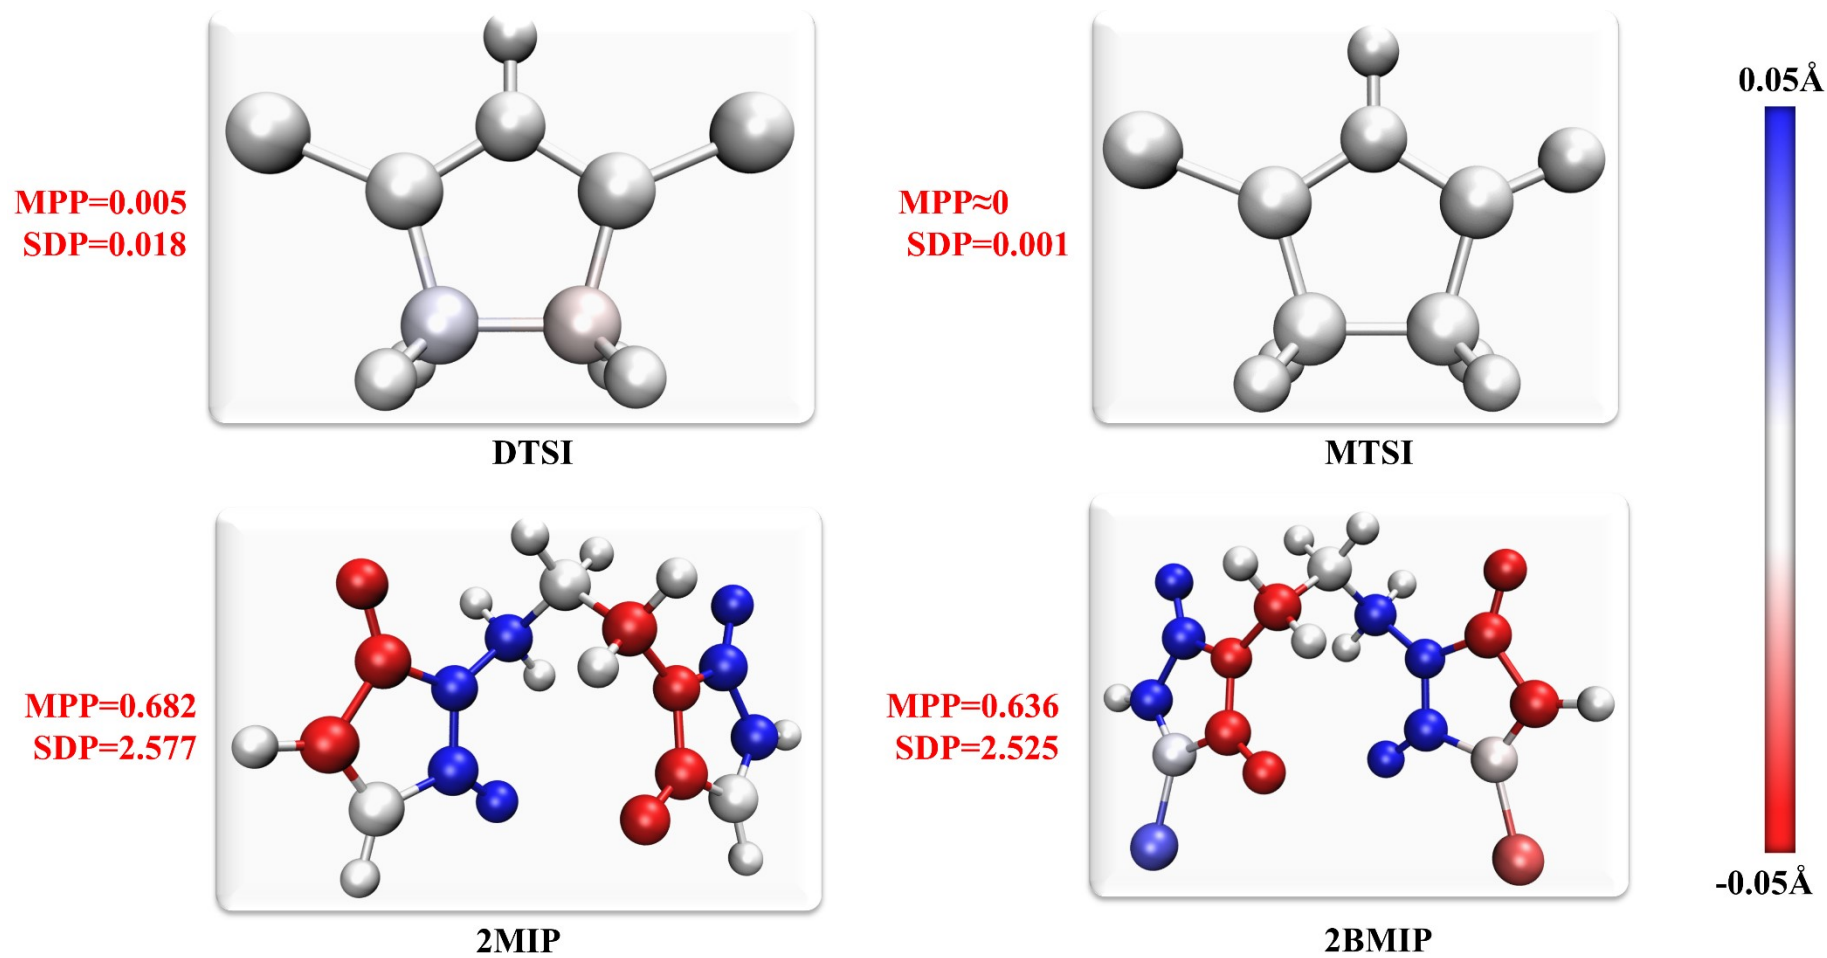

Figure S10. Molecular planarity parameters for DTSI, MTSI, 2MIP and 2BMIP in THF.

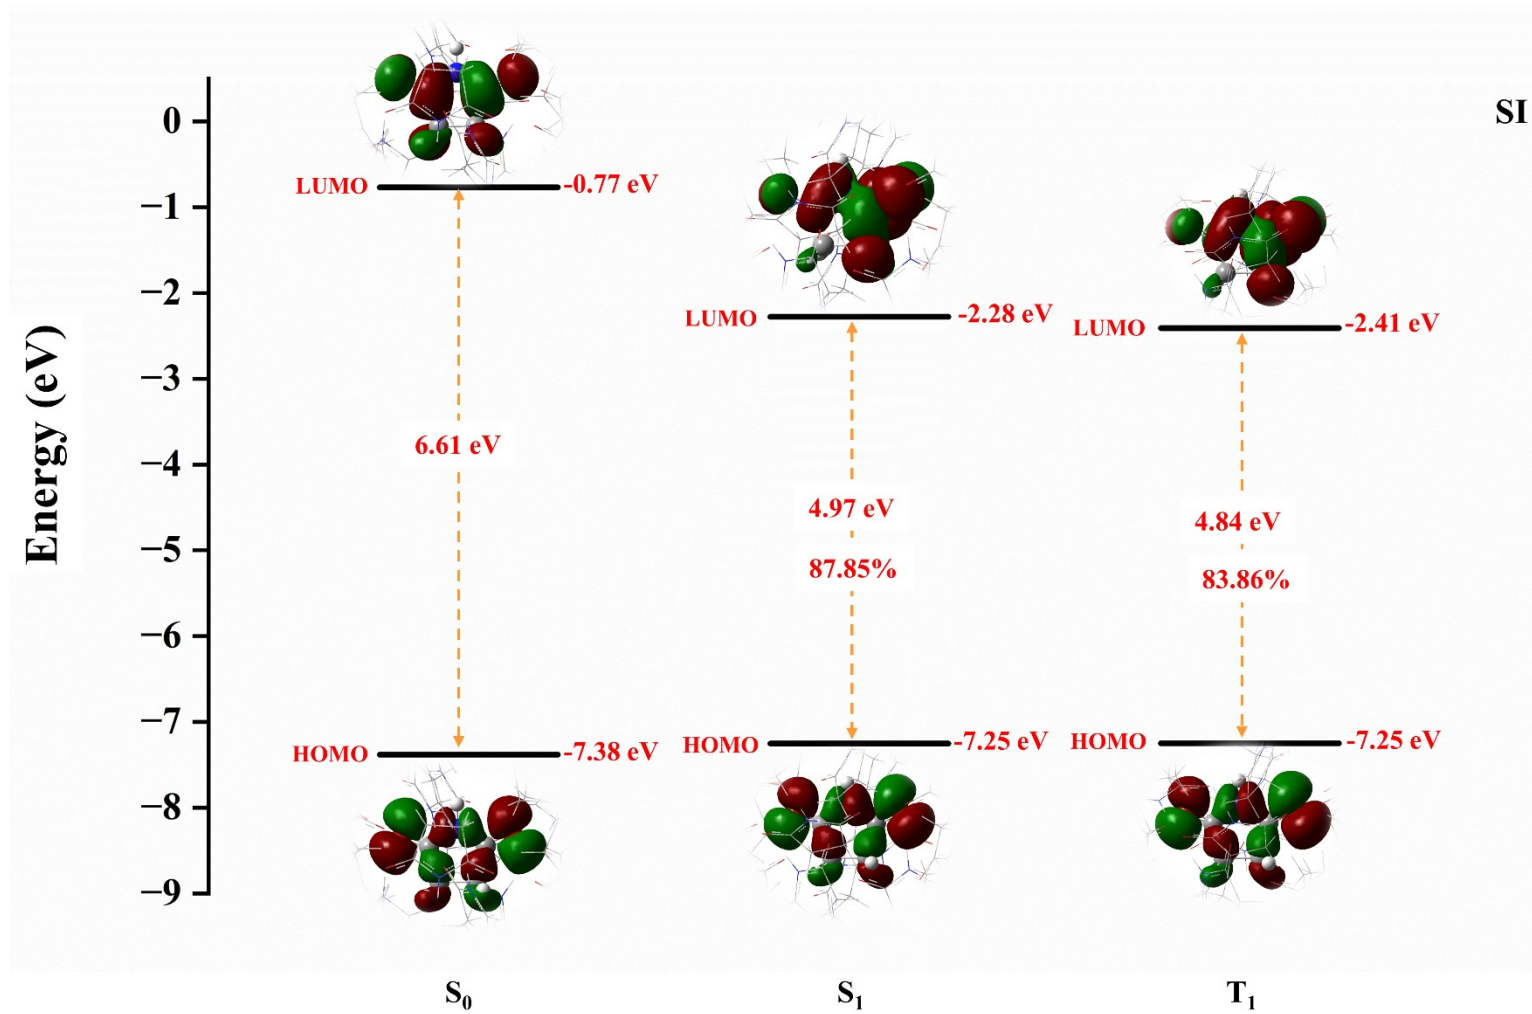

Figure S11. The orbital transition information for SI of the  $S_0$ ,  $S_1$ , and  $T_1$  states in solid phase.

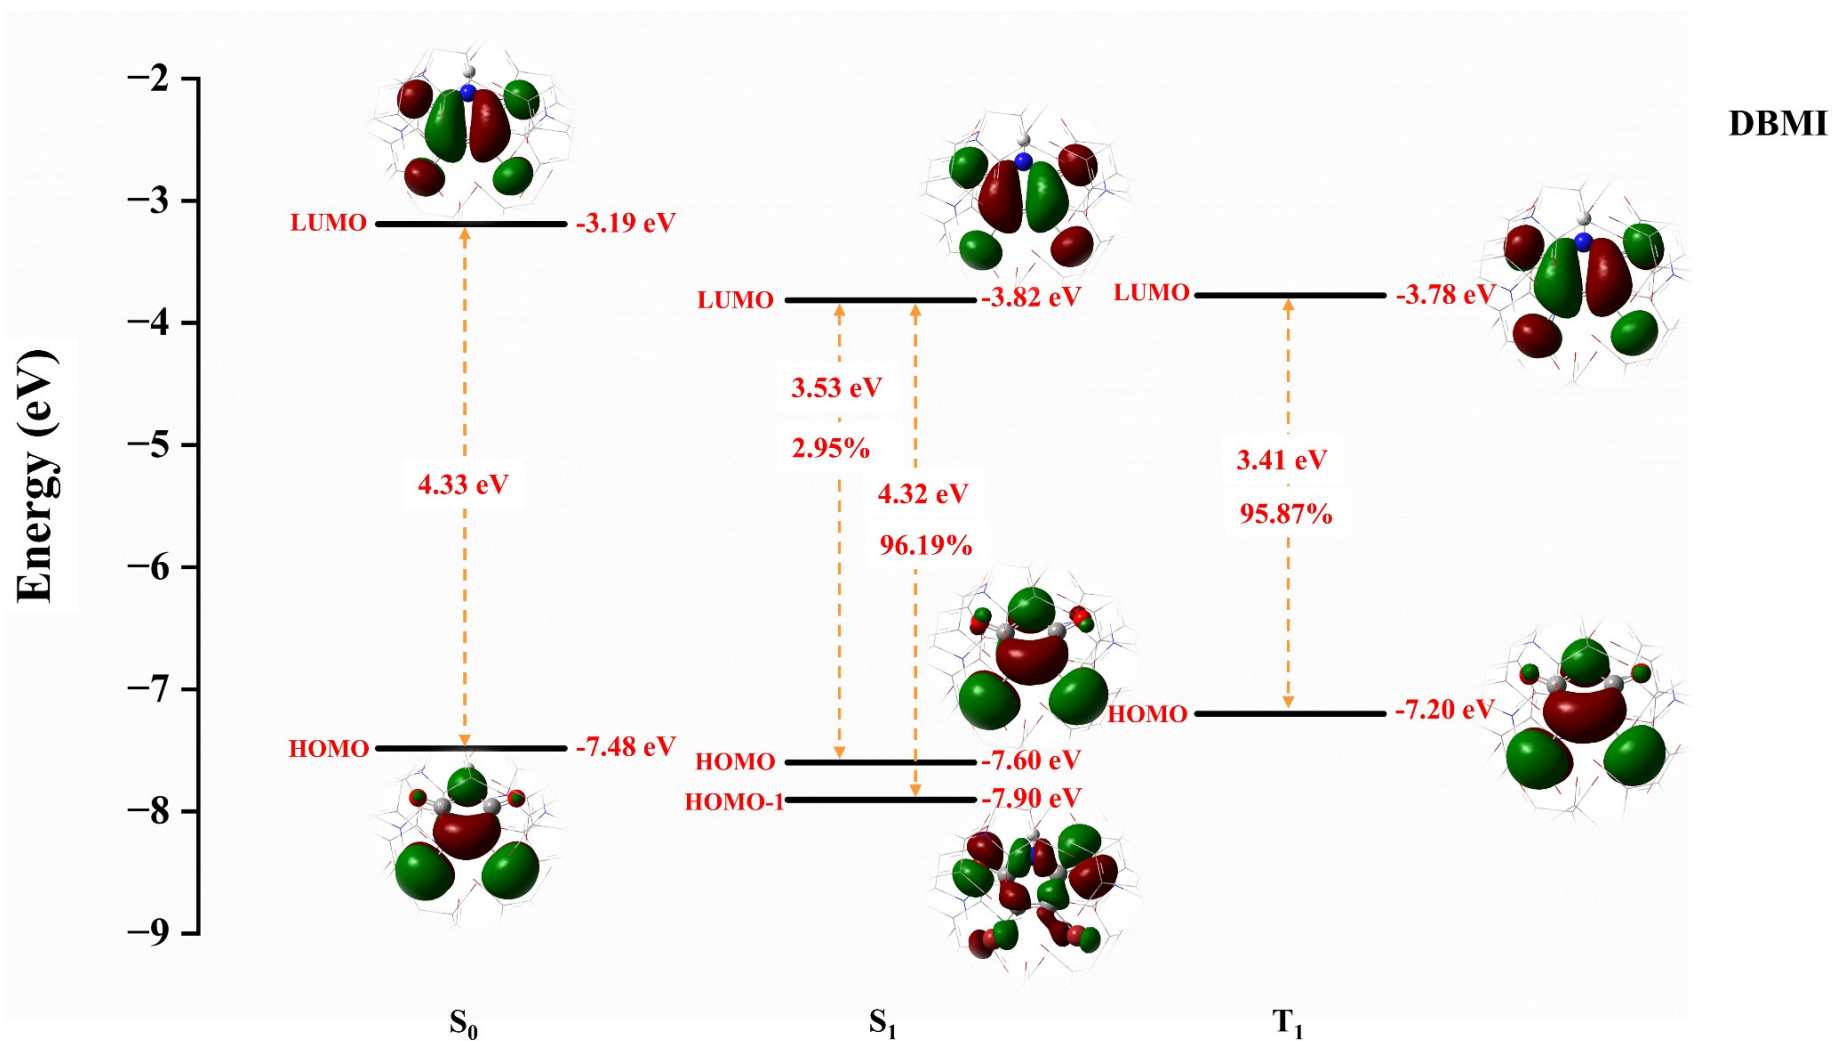

Figure S12. The orbital transition information for DBMI of the  $S_0$ ,  $S_1$ , and  $T_1$  states in solid phase.

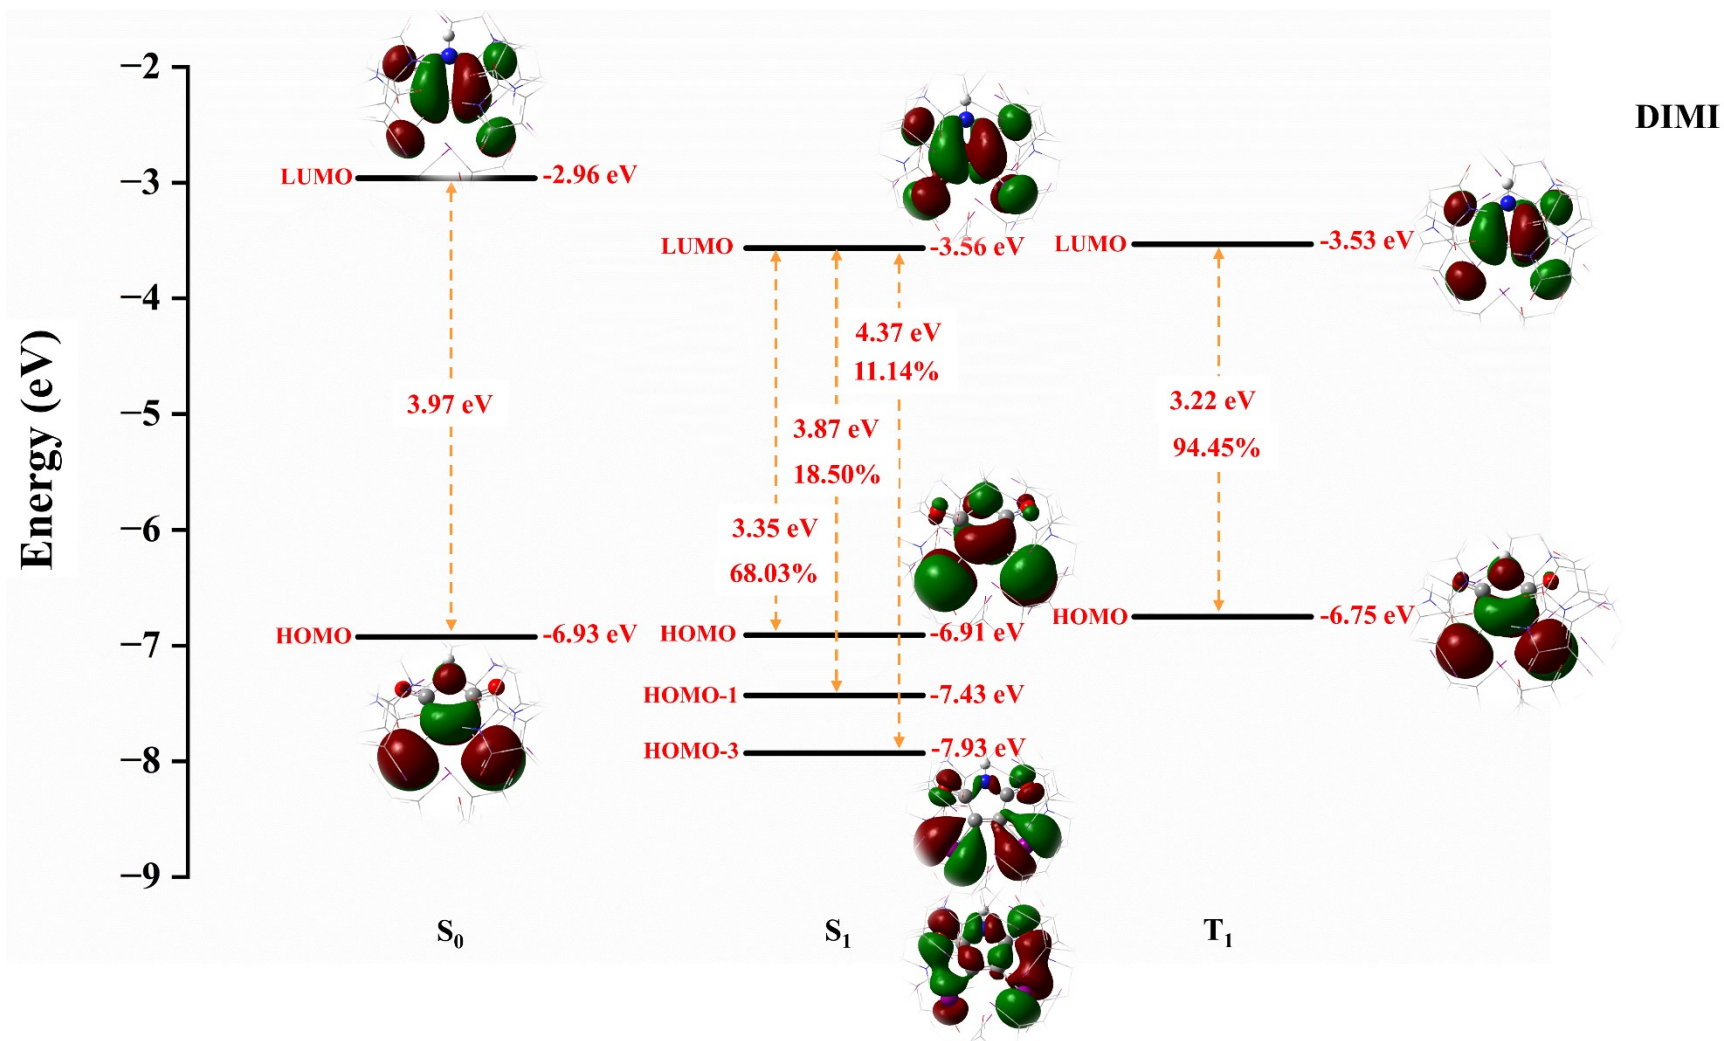

Figure S13. The orbital transition information for DIMI of the  $S_0$ ,  $S_1$ , and  $T_1$  states in solid phase.

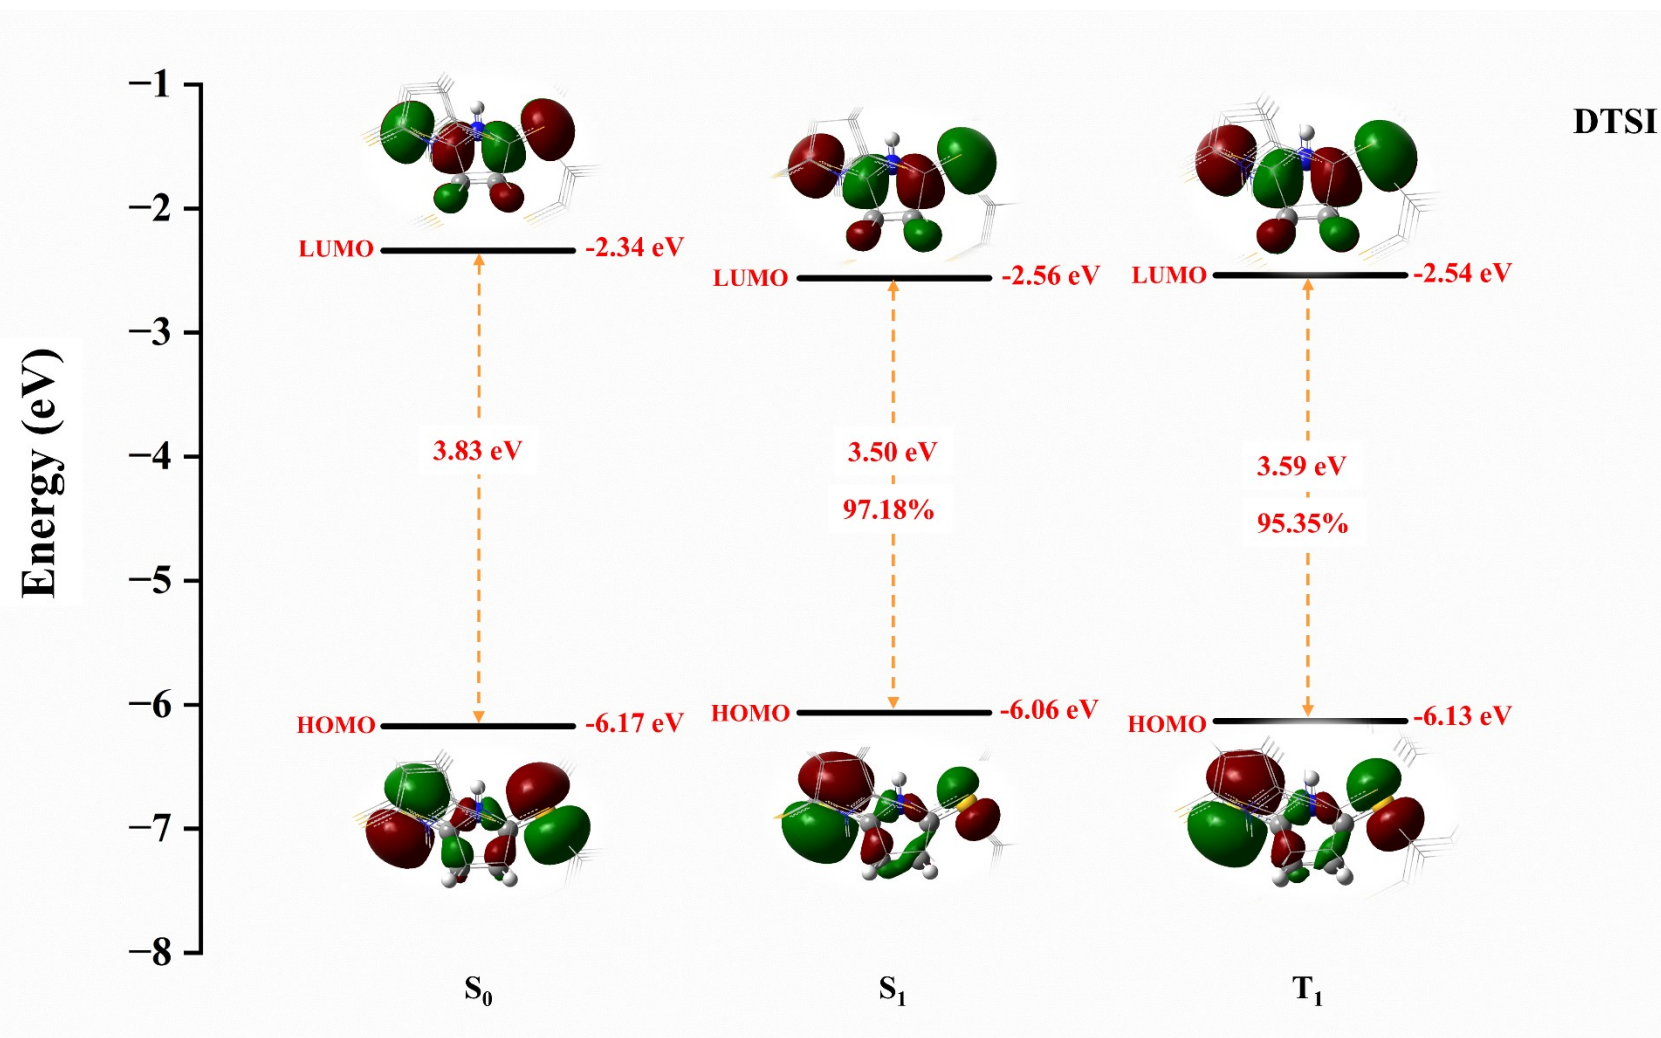

Figure S14. The orbital transition information for DTSI of the  $S_0$ ,  $S_1$ , and  $T_1$  states in solid phase.

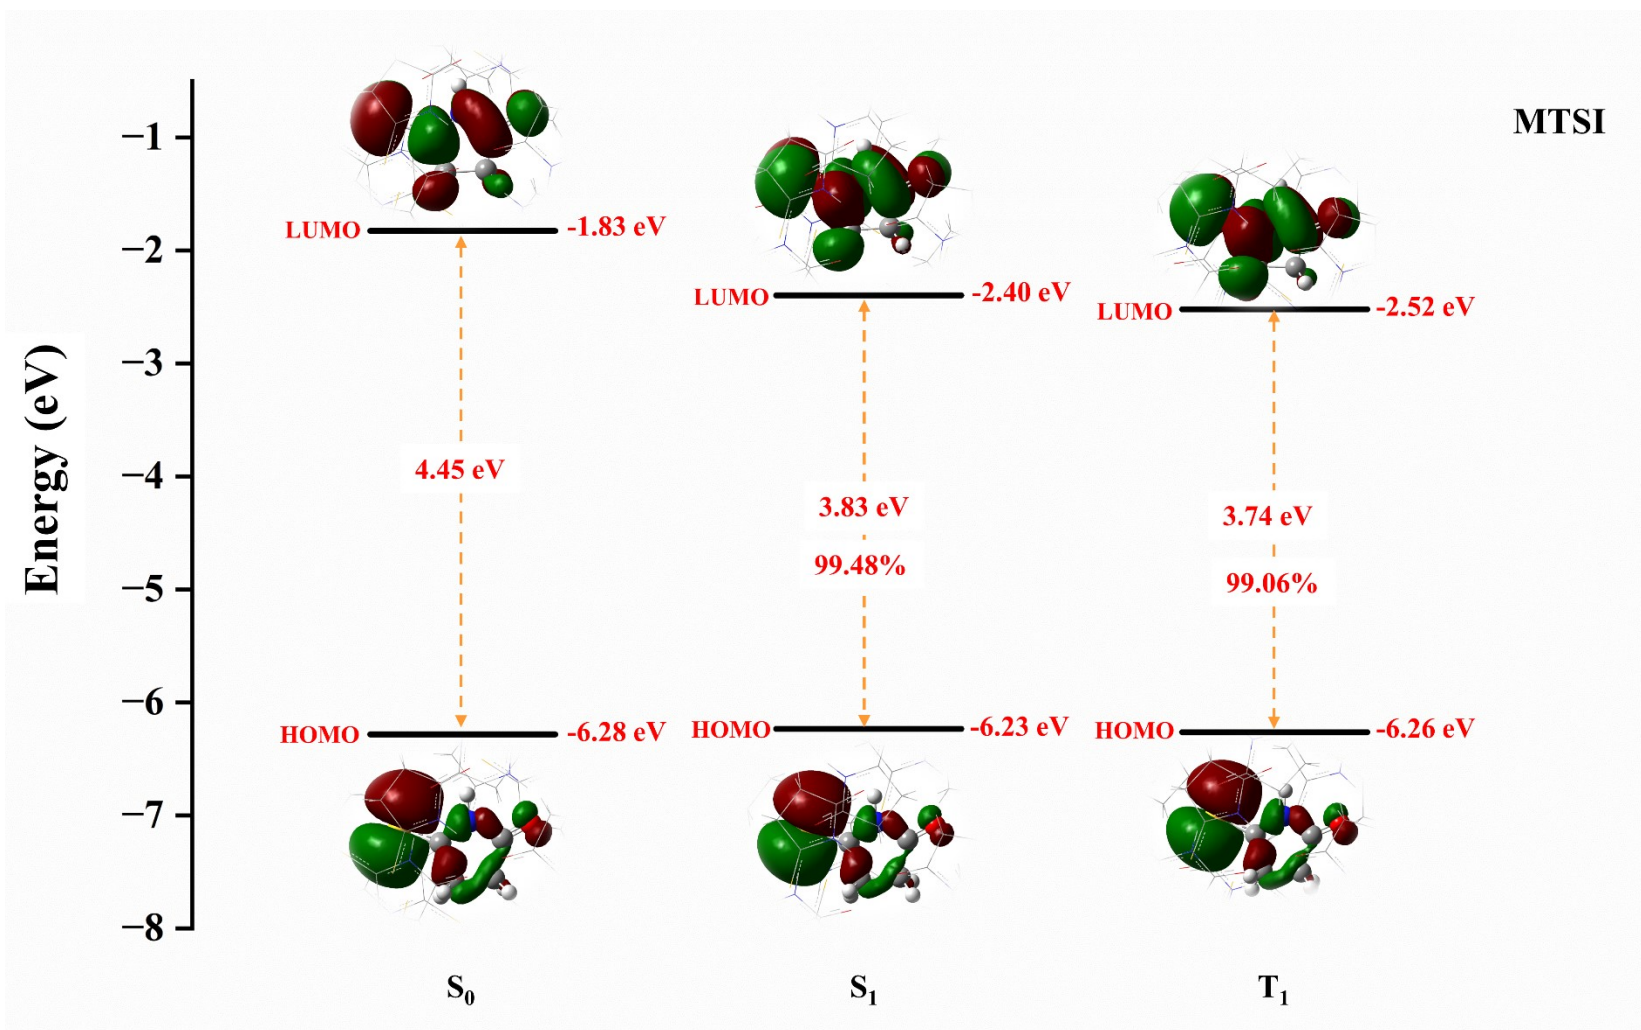

Figure S15. The orbital transition information for MTSI of the  $S_0$ ,  $S_1$ , and  $T_1$  states in solid phase.



2MIP

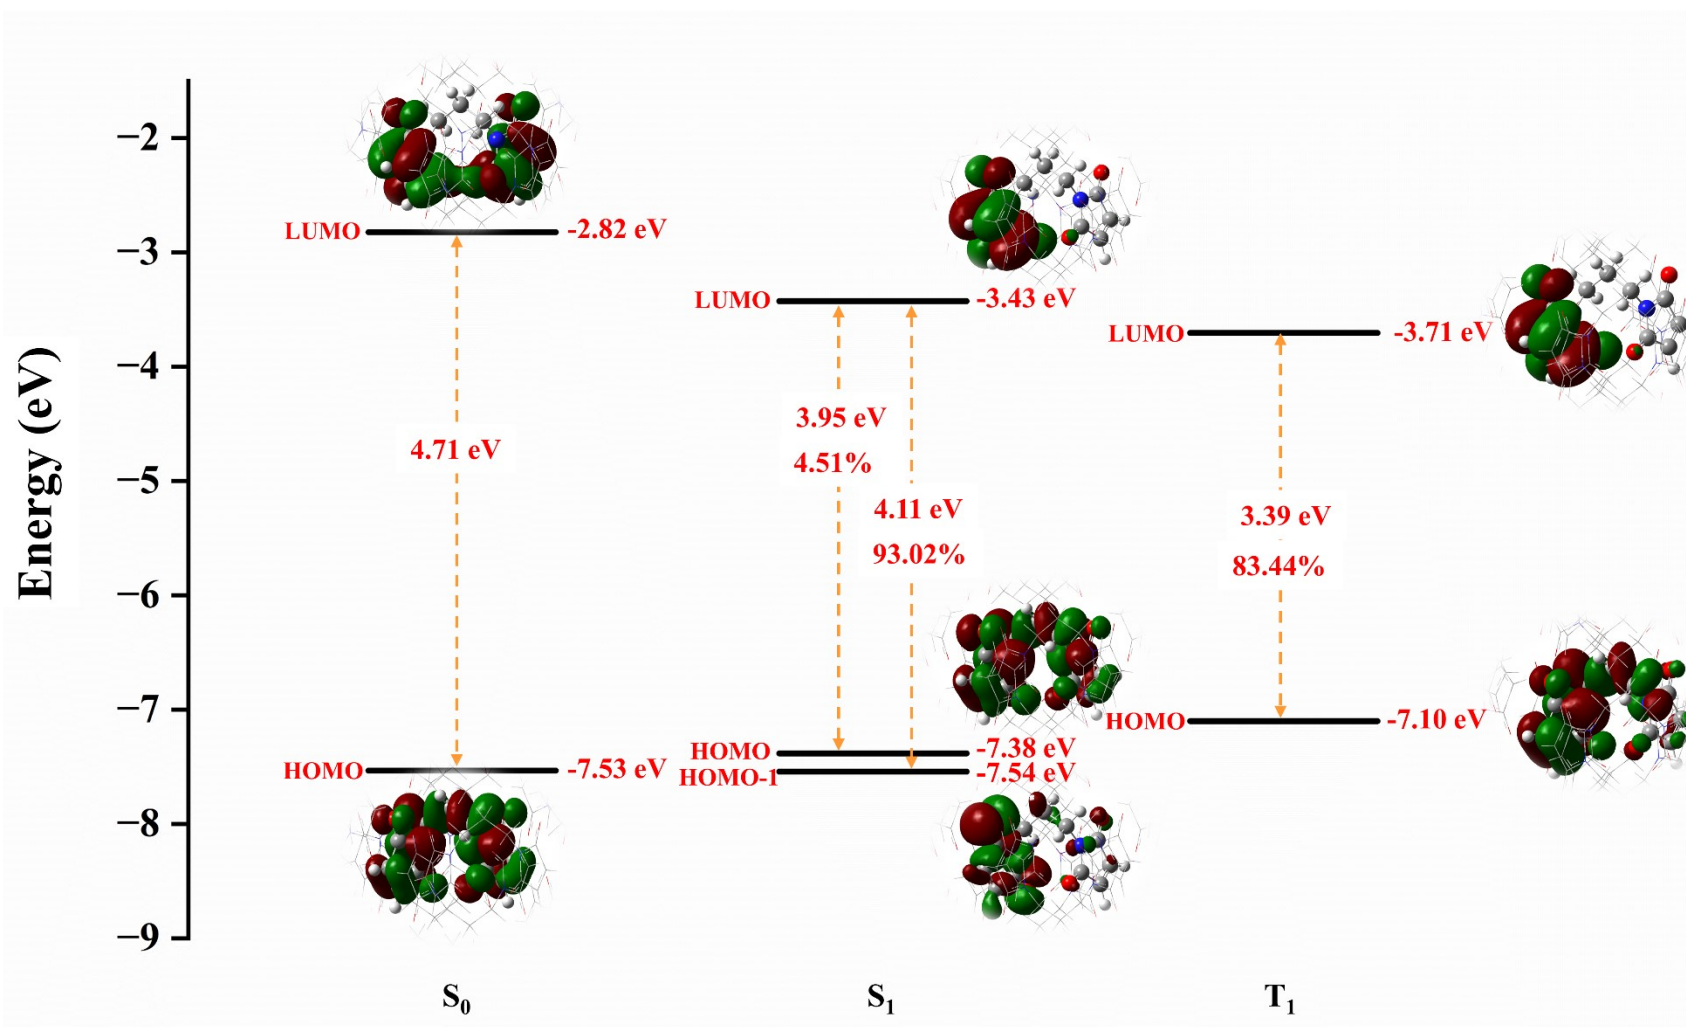

Figure S16. The orbital transition information for 2MIP of the  $S_0$ ,  $S_1$ , and  $T_1$  states in solid phase.

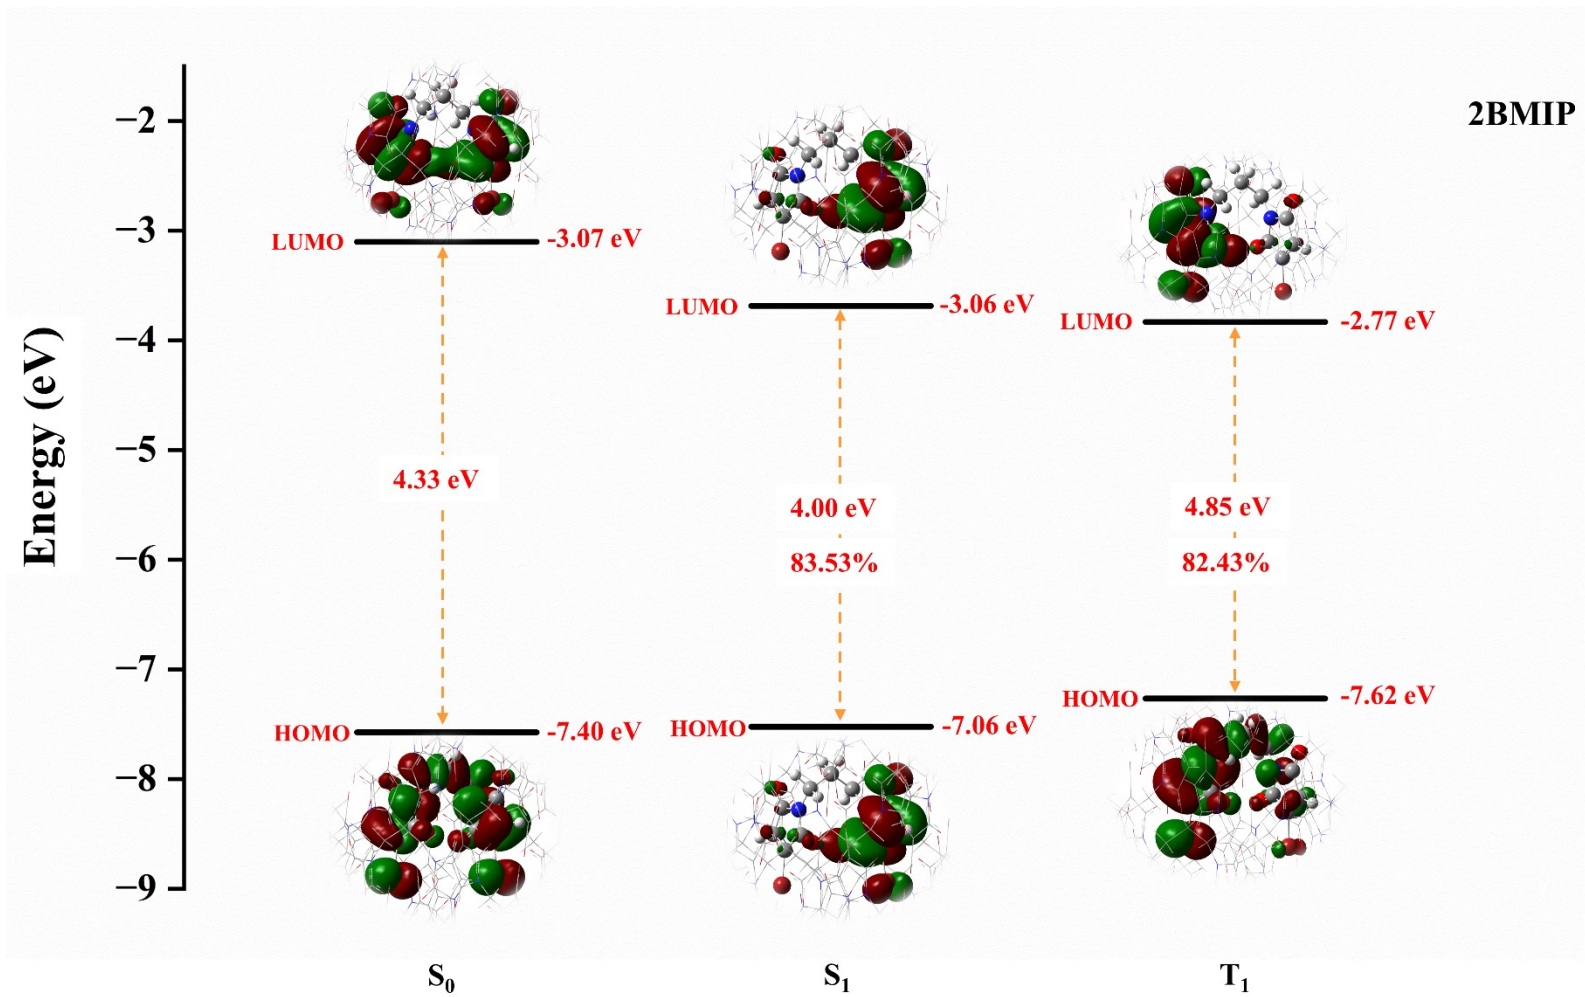

Figure S17. The orbital transition information for 2BMIP of the  $S_0$ ,  $S_1$ , and  $T_1$  states in solid phase.

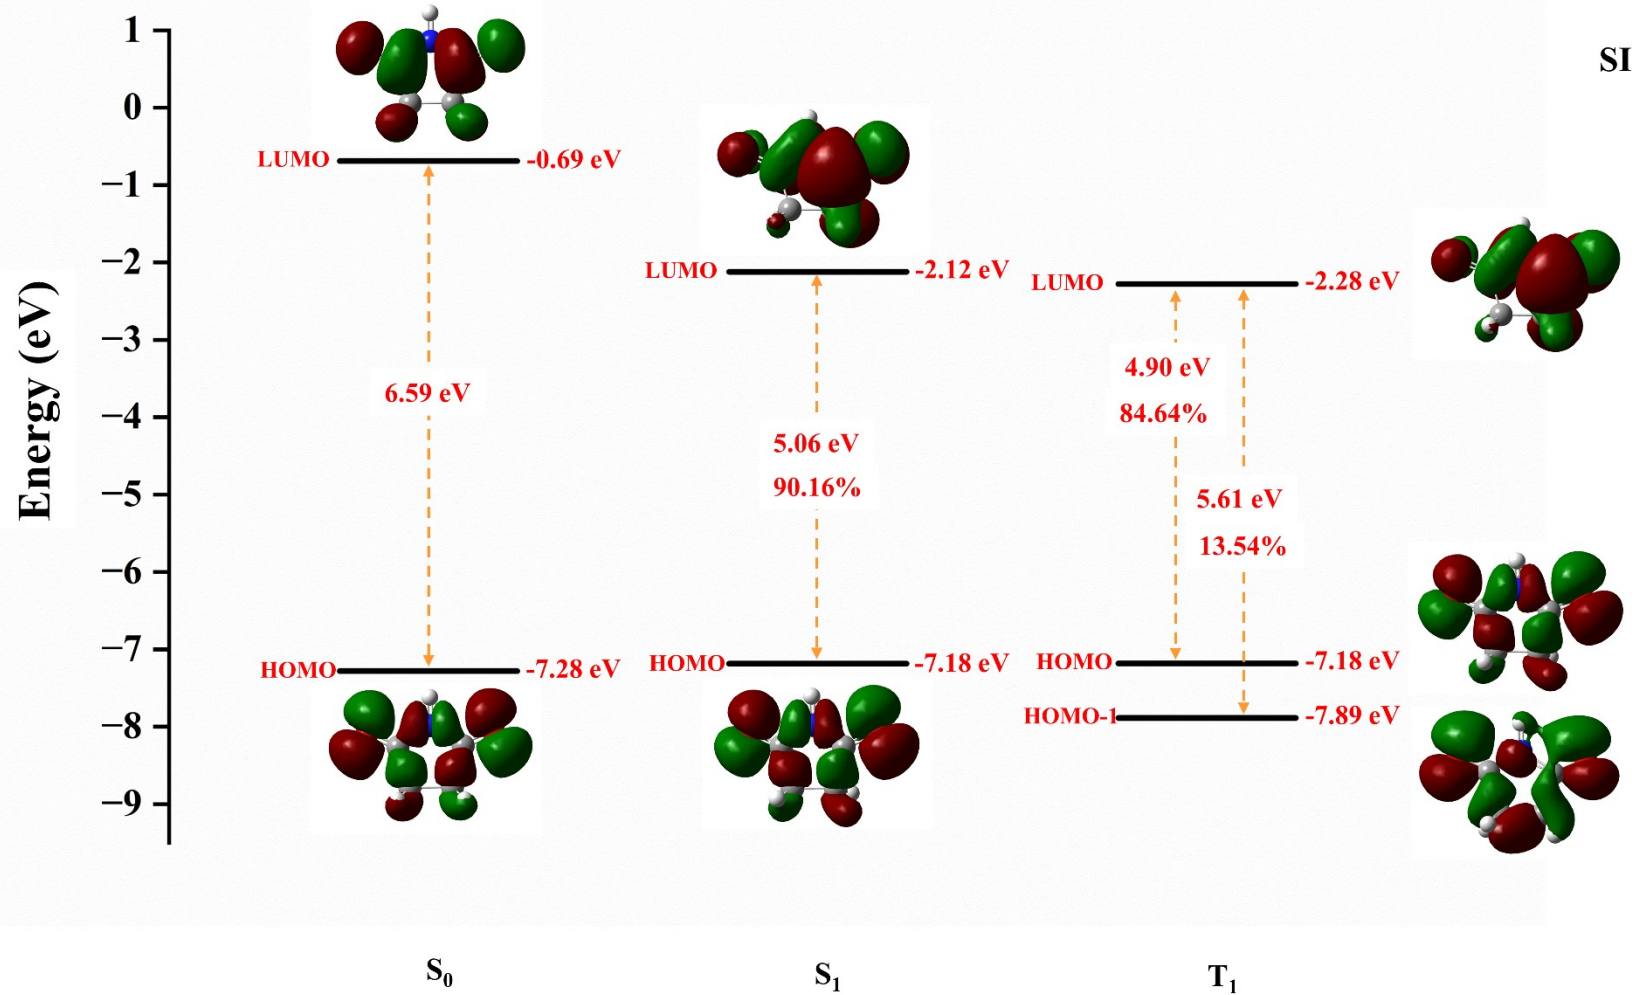

Figure S18. The orbital transition information for SI of the  $S_0$ ,  $S_1$ , and  $T_1$  states in THF.

DBMI

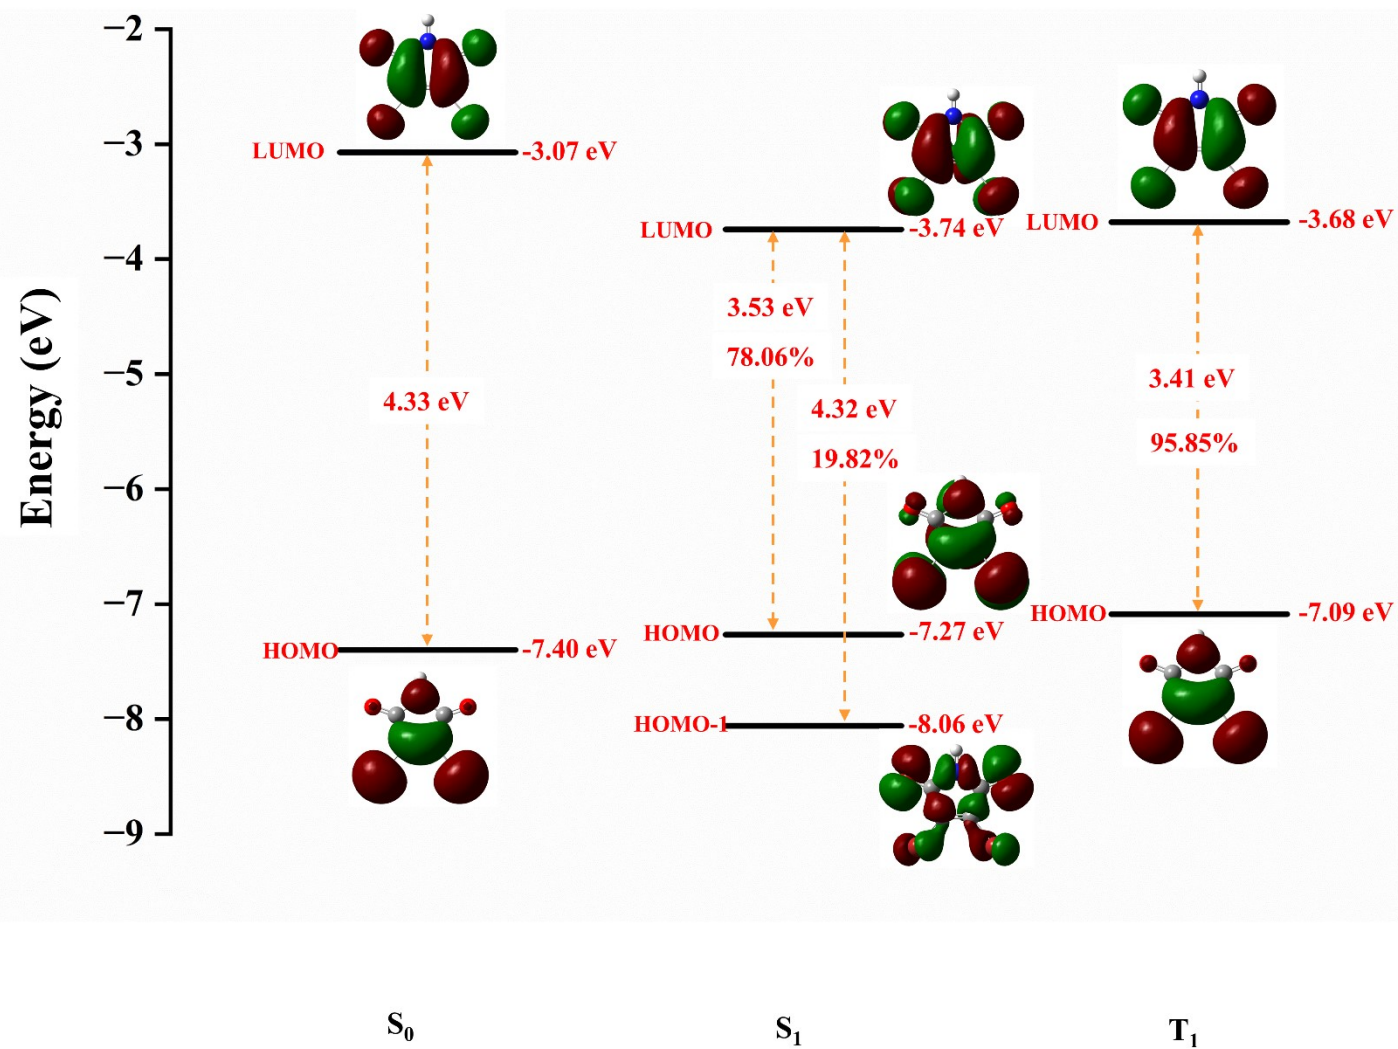

Figure S19. The orbital transition information for DBMI of the  $S_0$ ,  $S_1$ , and  $T_1$  states in THF.

DIMI

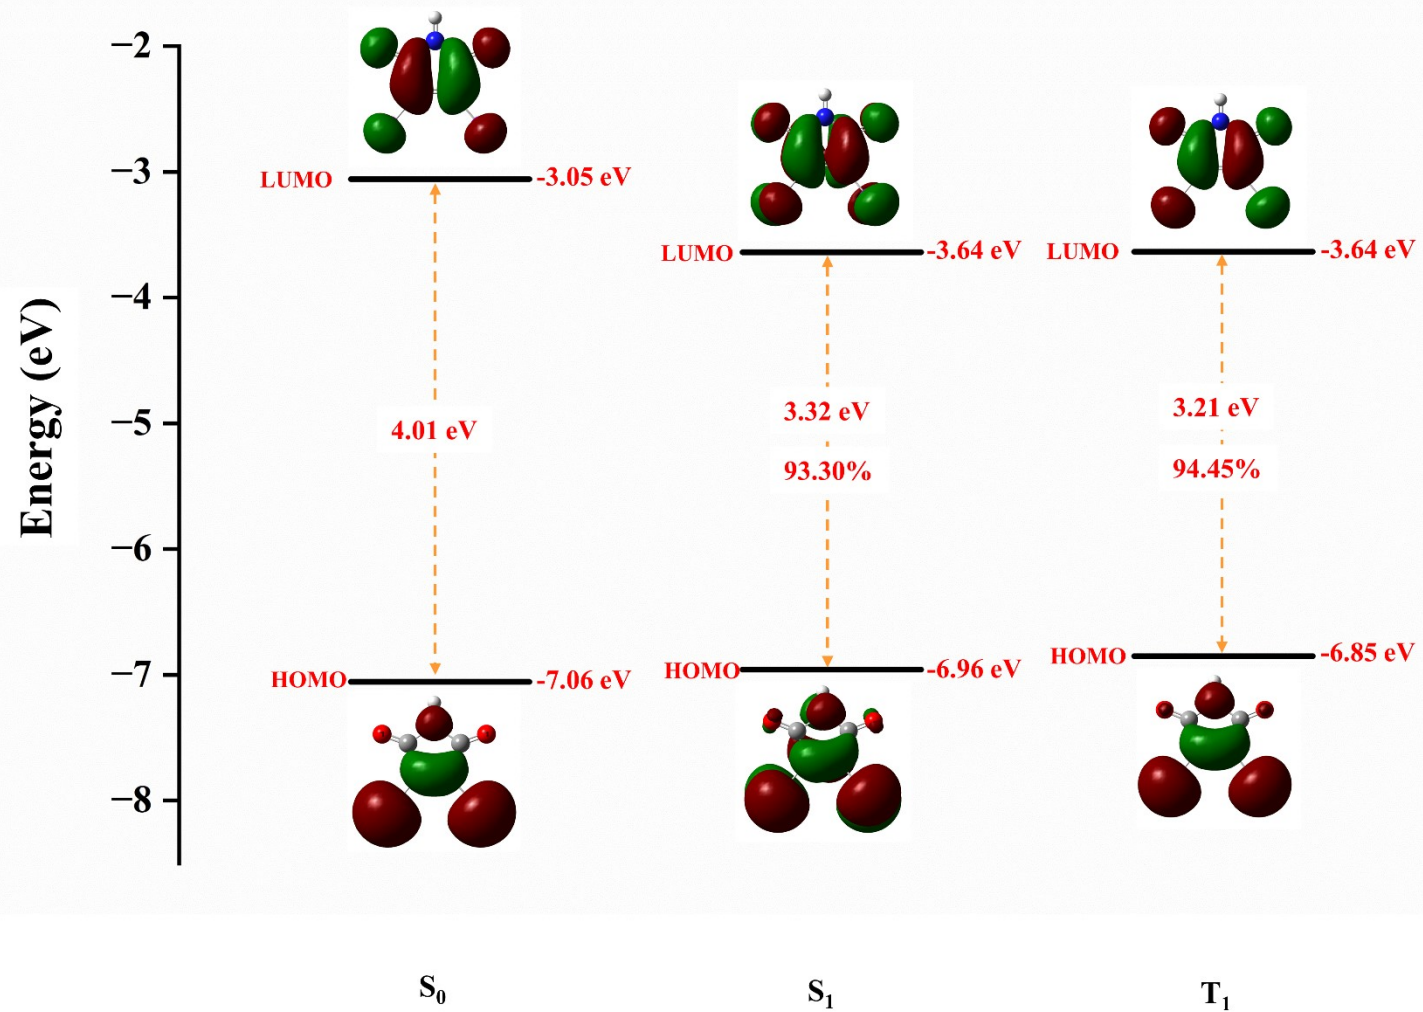

Figure S20. The orbital transition information for DIMI of the  $S_0$ ,  $S_1$ , and  $T_1$  states in THF.

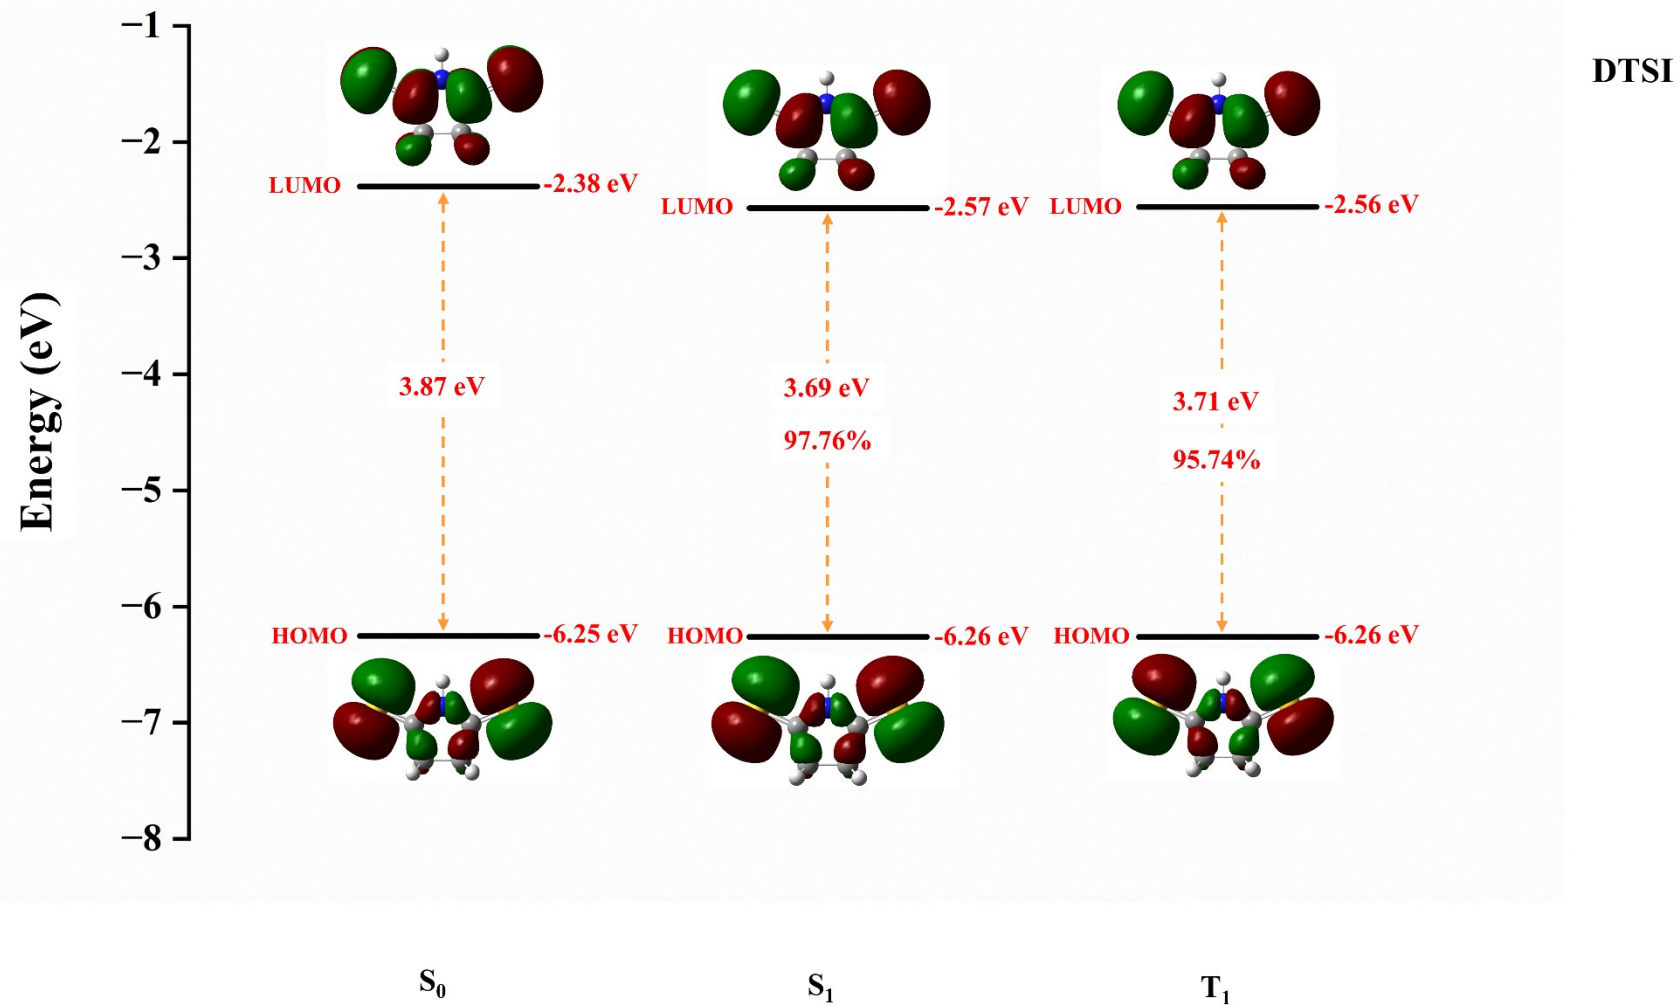

Figure S21. The orbital transition information for DTSI of the  $S_0$ ,  $S_1$ , and  $T_1$  states in THF.

MTSI

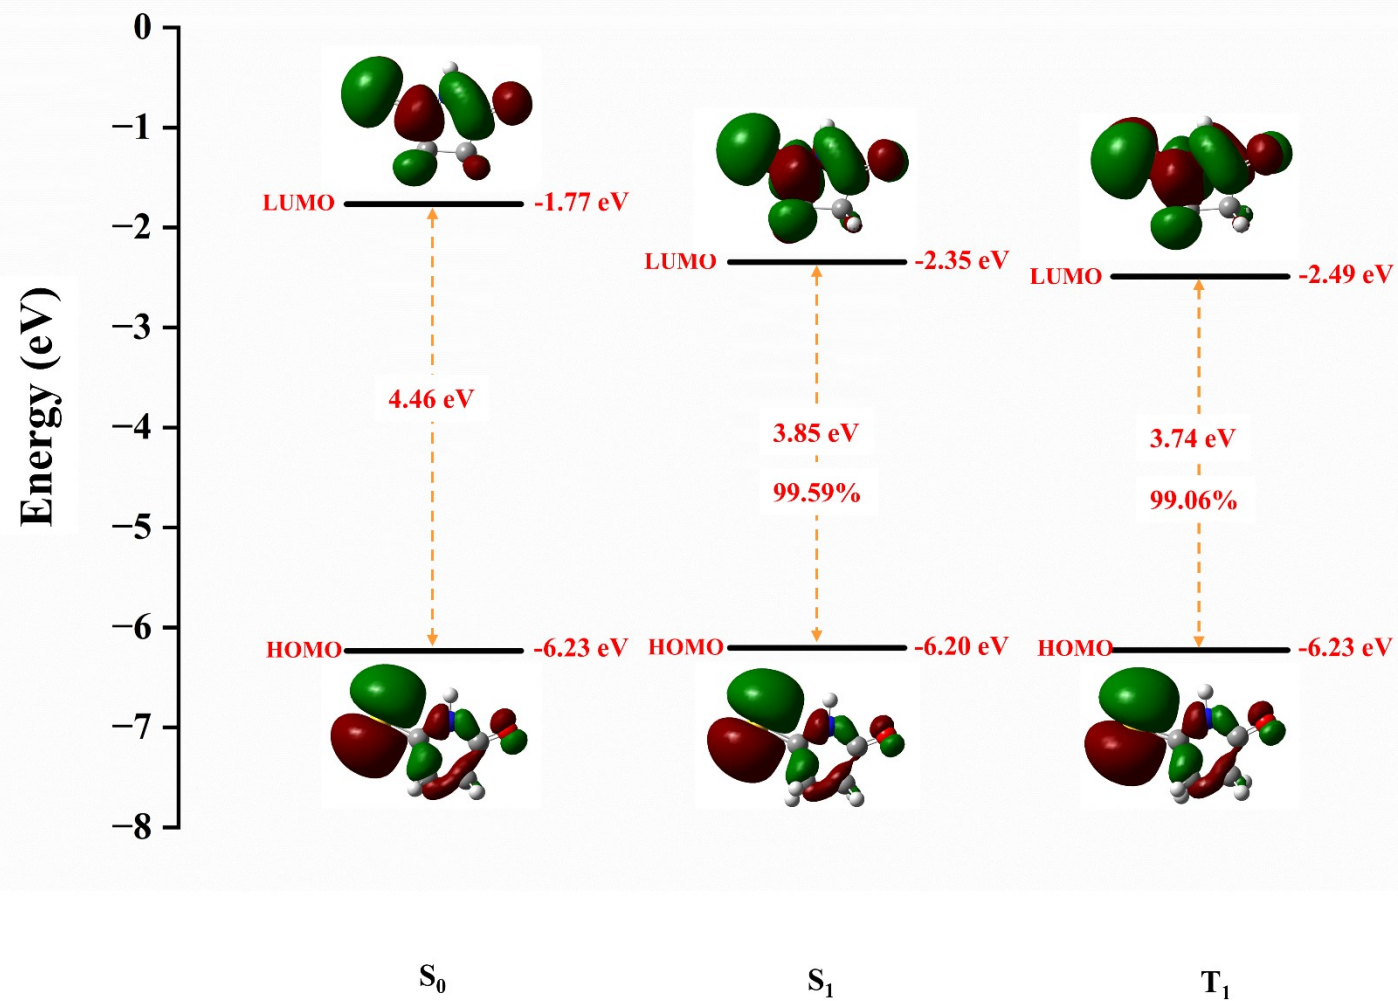

Figure S22. The orbital transition information for MTSI of the  $S_0$ ,  $S_1$ , and  $T_1$  states in THF.

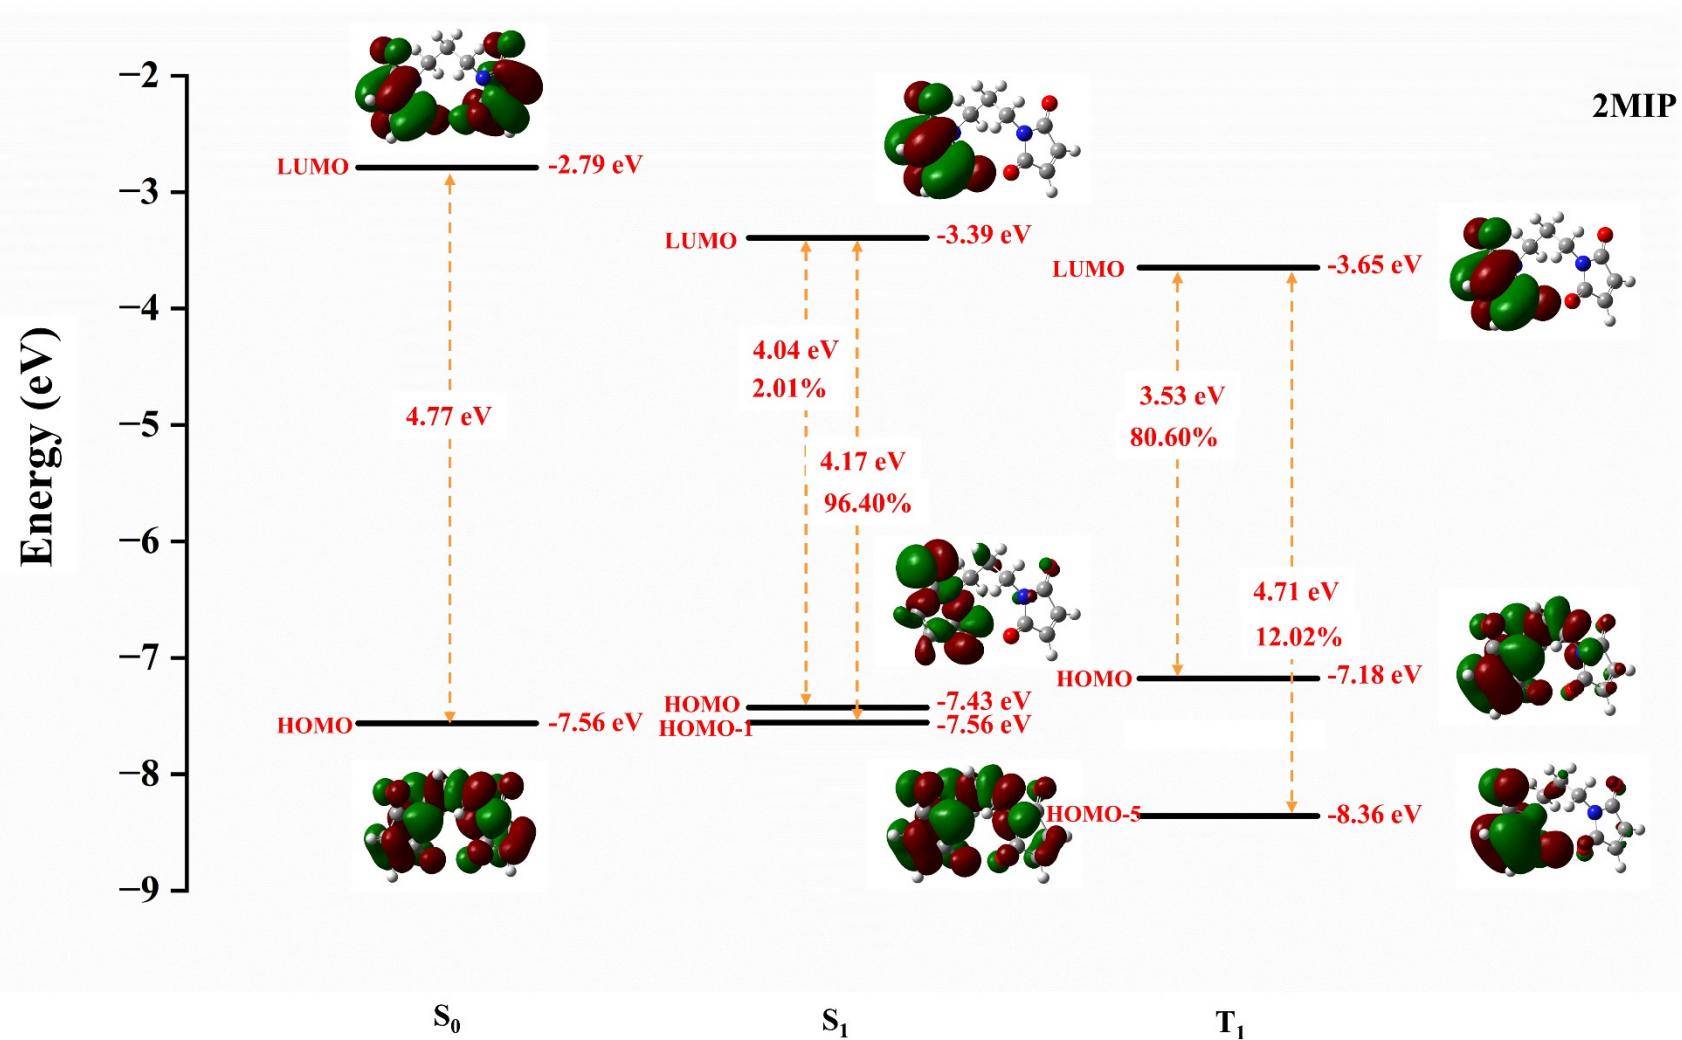

Figure S23. The orbital transition information for 2MIP of the  $S_0$ ,  $S_1$ , and  $T_1$  states in THF.



2BMIP

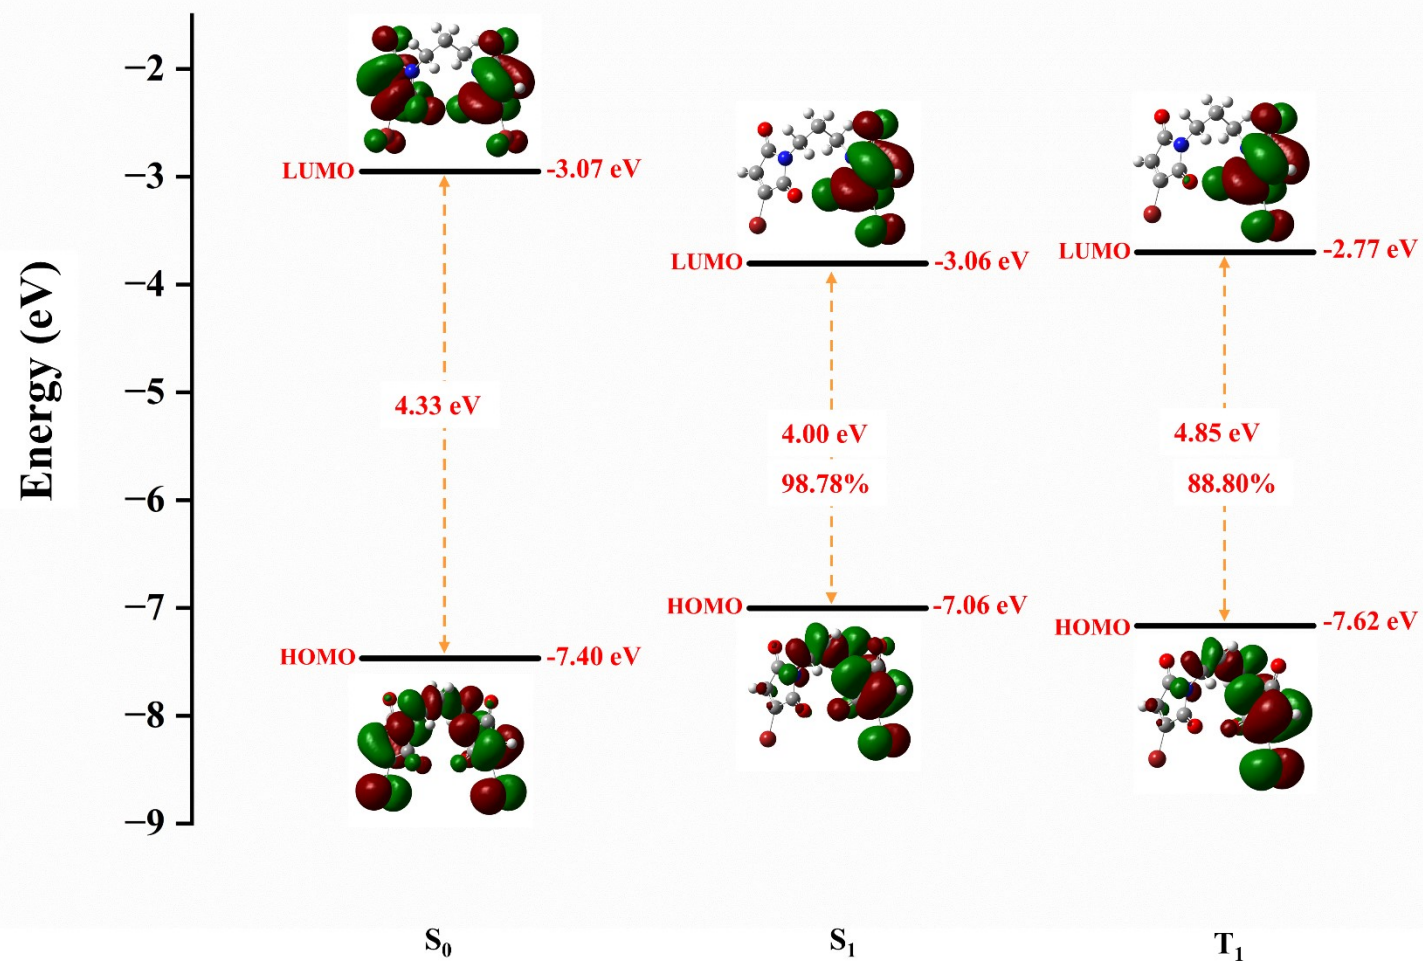

Figure S24. The orbital transition information for 2BMIP of the  $S_0$ ,  $S_1$ , and  $T_1$  states in THF.

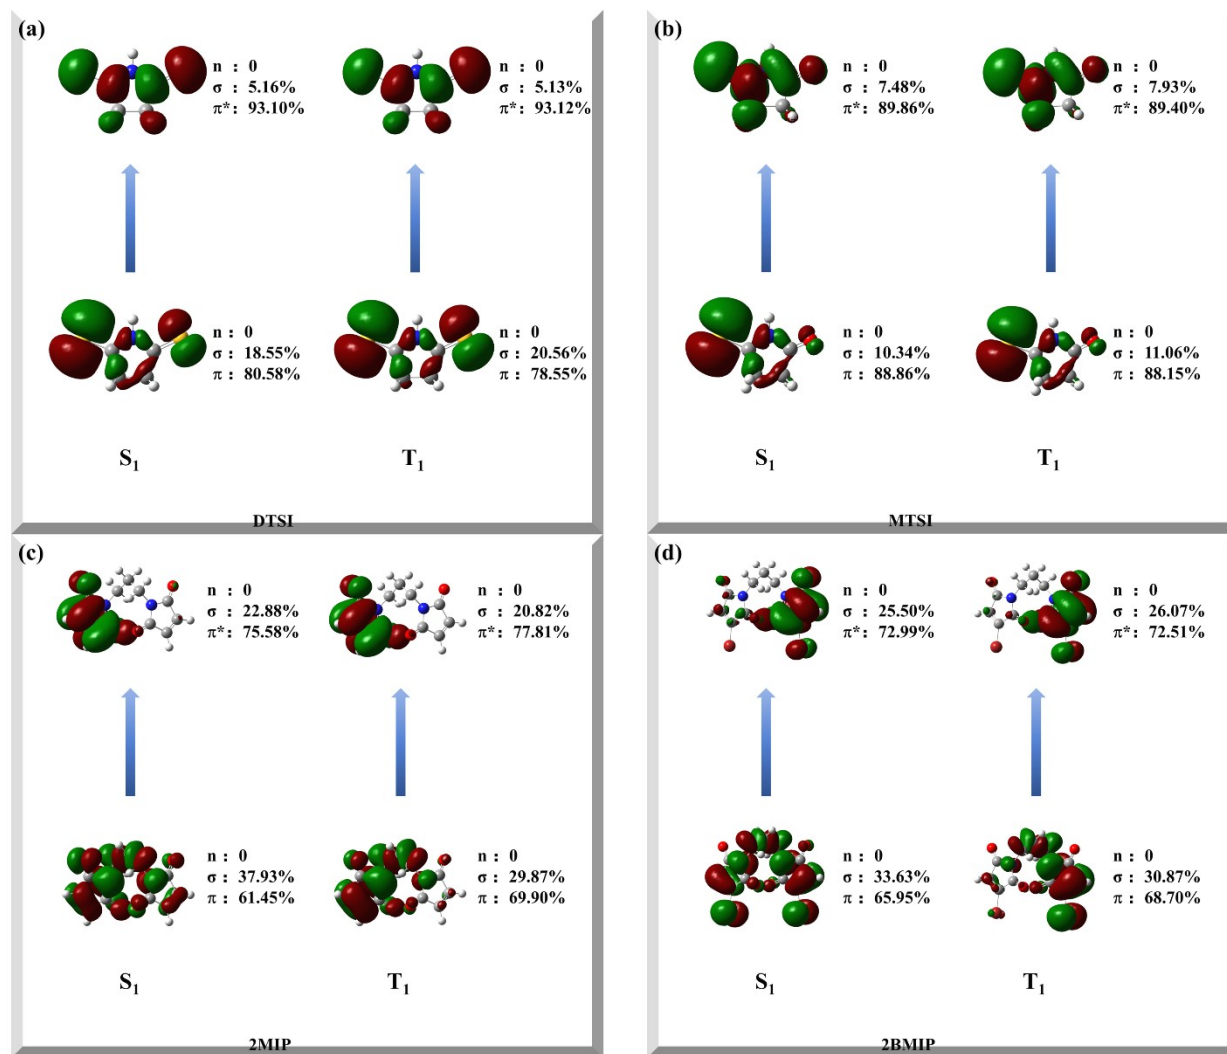

Figure S25. Composition (%) of atoms in frontier MOs of DTSI (a), MTSI (b), 2MIP (c) and 2BMIP (d) calculated by NAO method in solid phase.

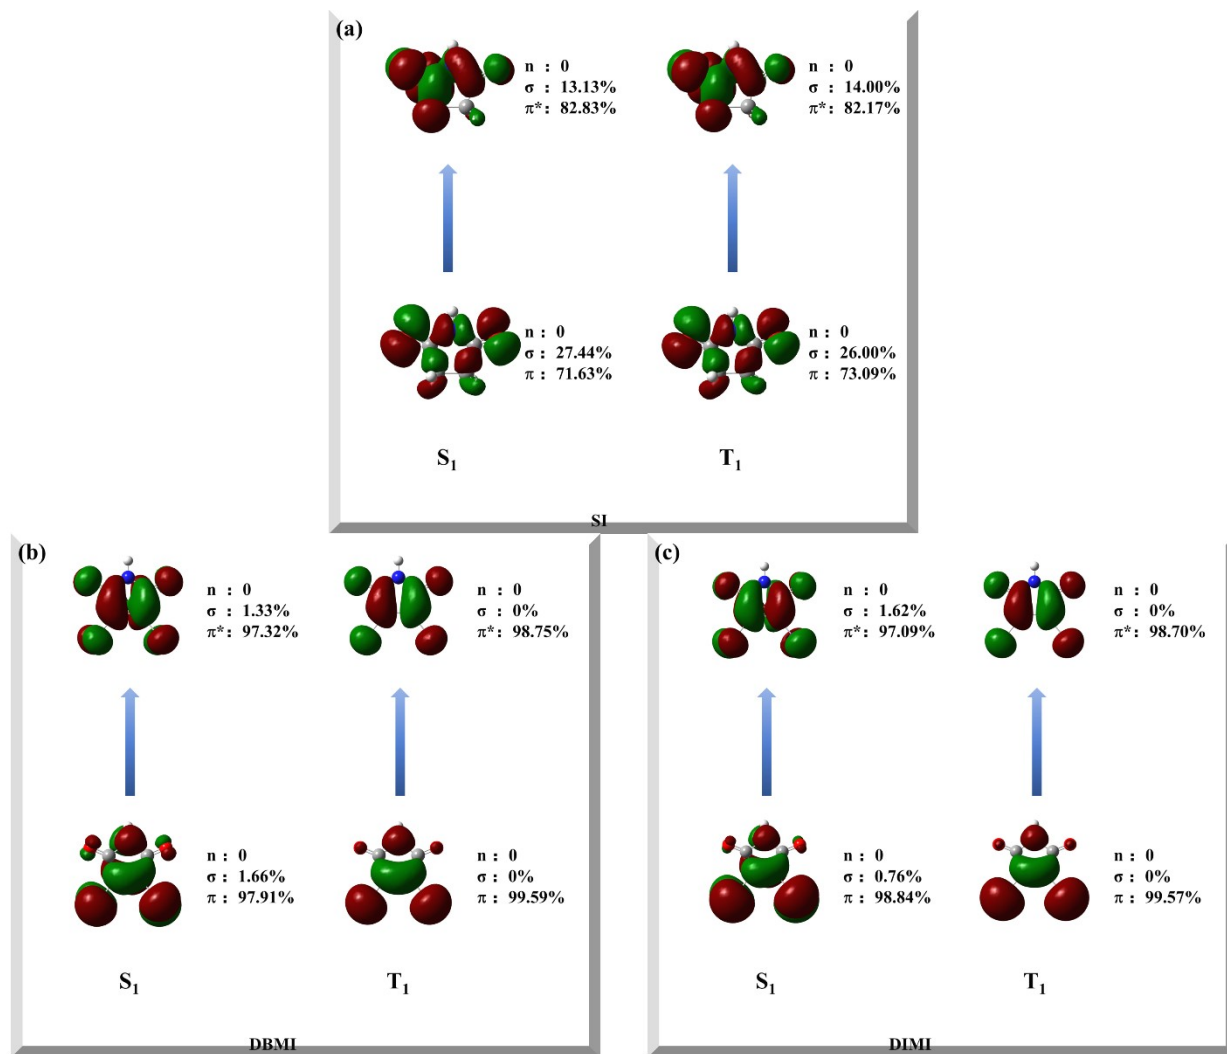

Figure S26. Composition (%) of atoms in frontier MOs of SI (a), DBMI (b) and DIMI (c) calculated by NAO method in THF.

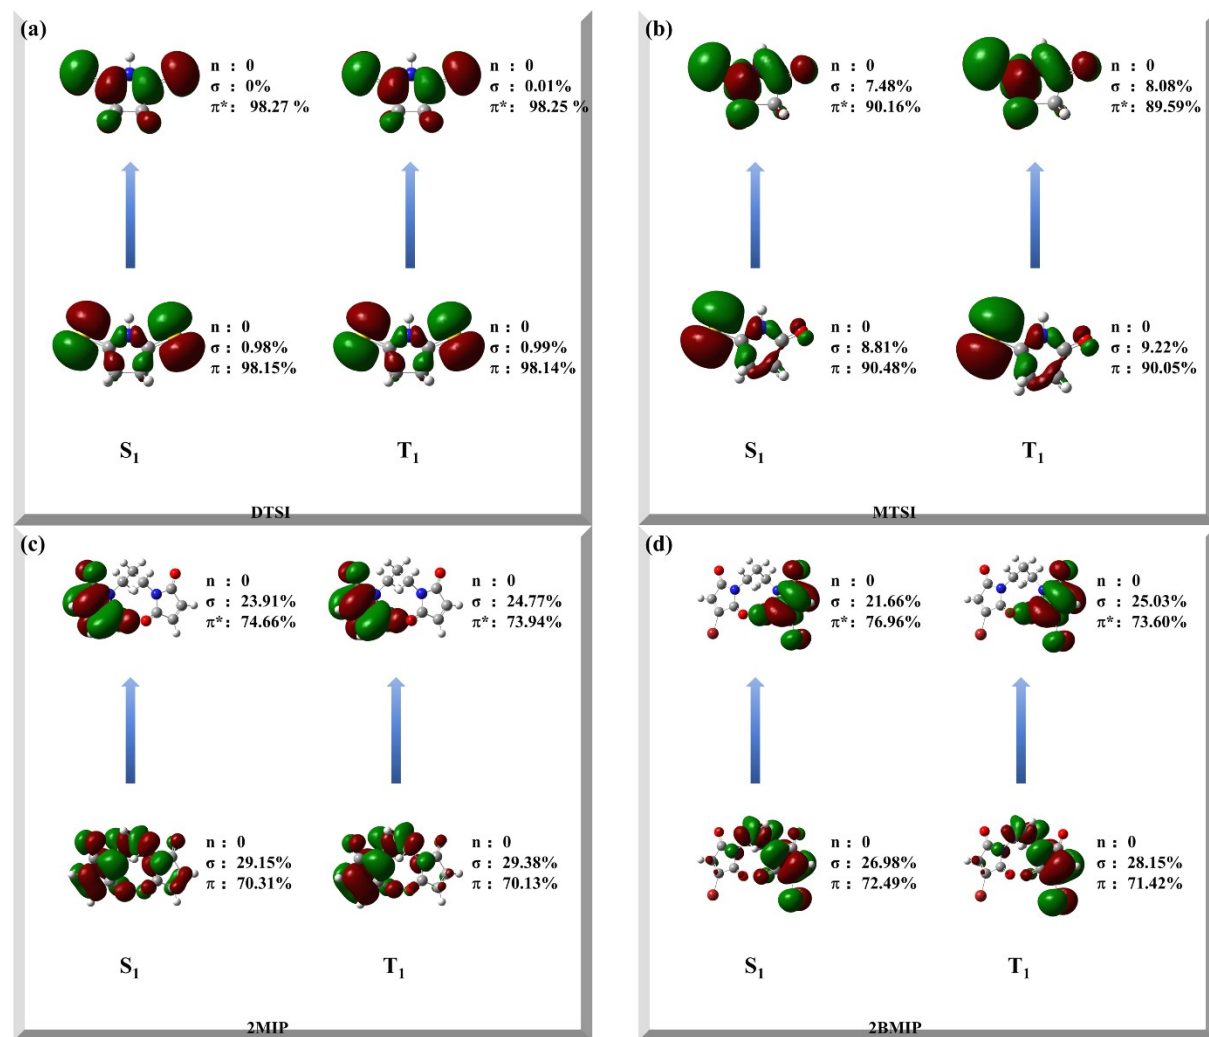

Figure S27. Composition (%) of atoms in frontier MOs of DTSI (a), MTSI (b), 2MIP (c) and 2BMIP (d) calculated by NAO method in THF.

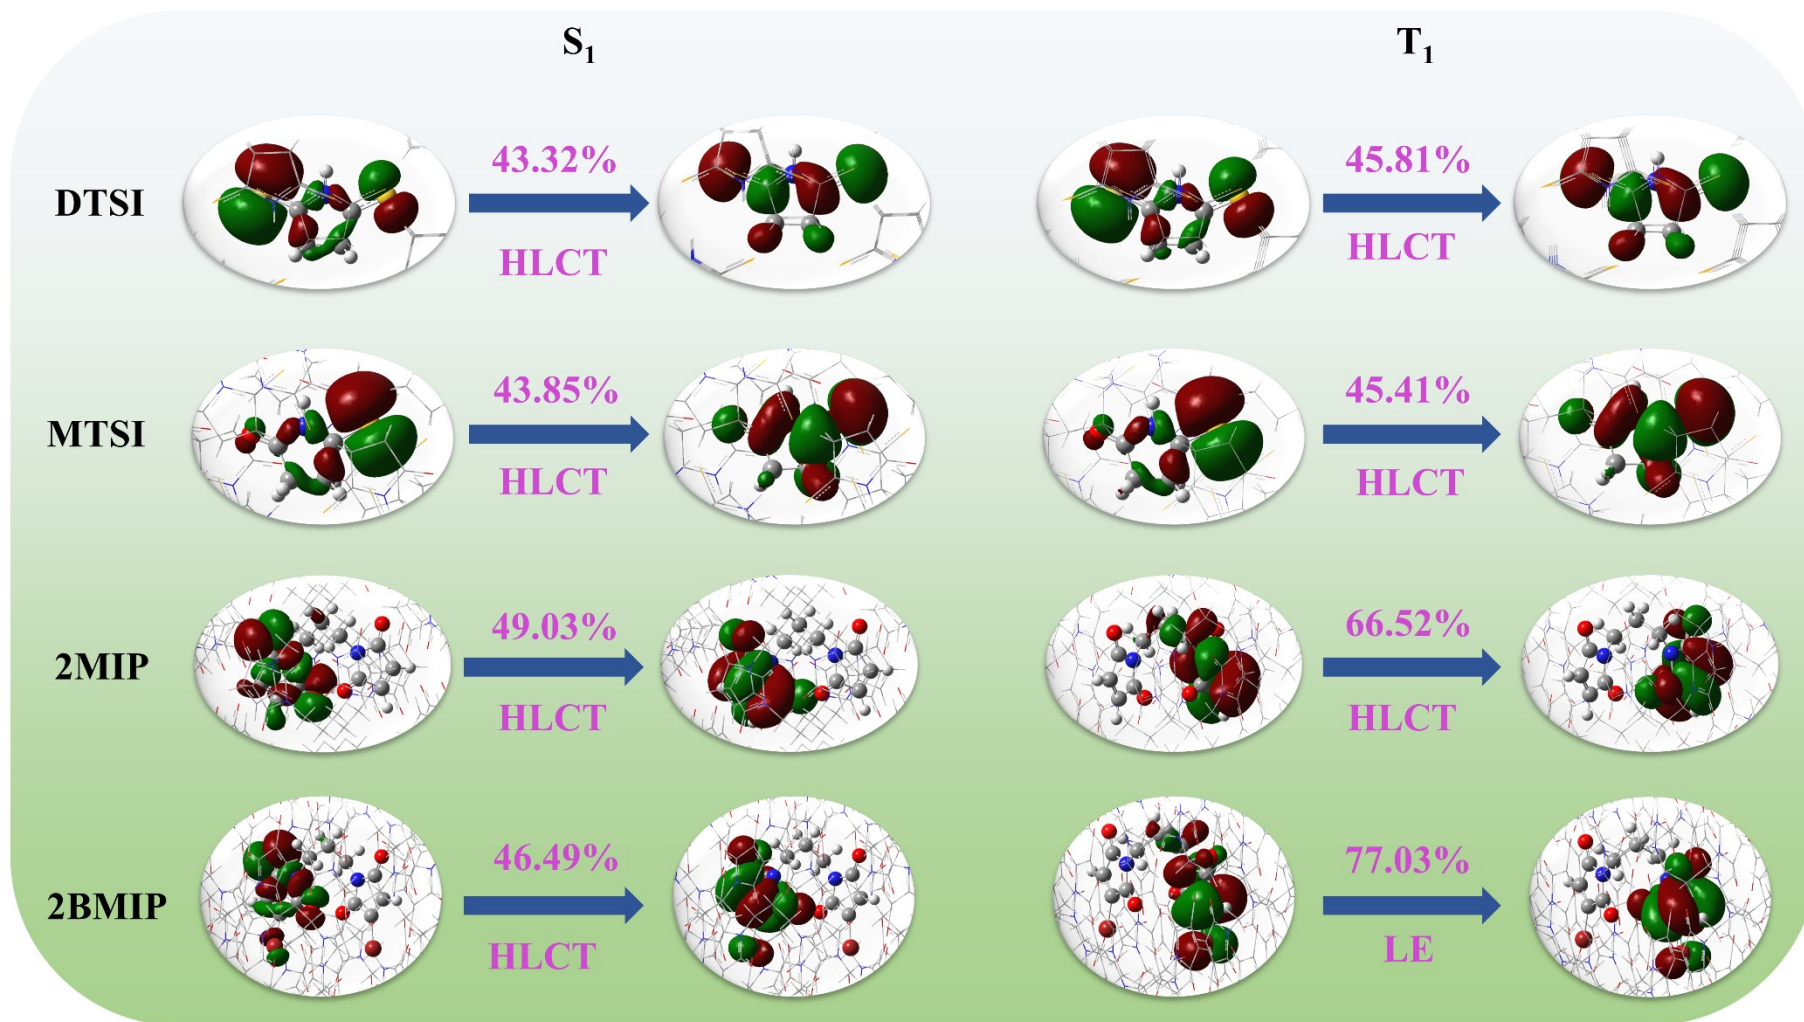

Figure S28. Natural transition orbitals (NTOs) of the  $S_1$  and  $T_1$  states for DTSI, MTSI, 2MIP and 2BMIP in solid phase.

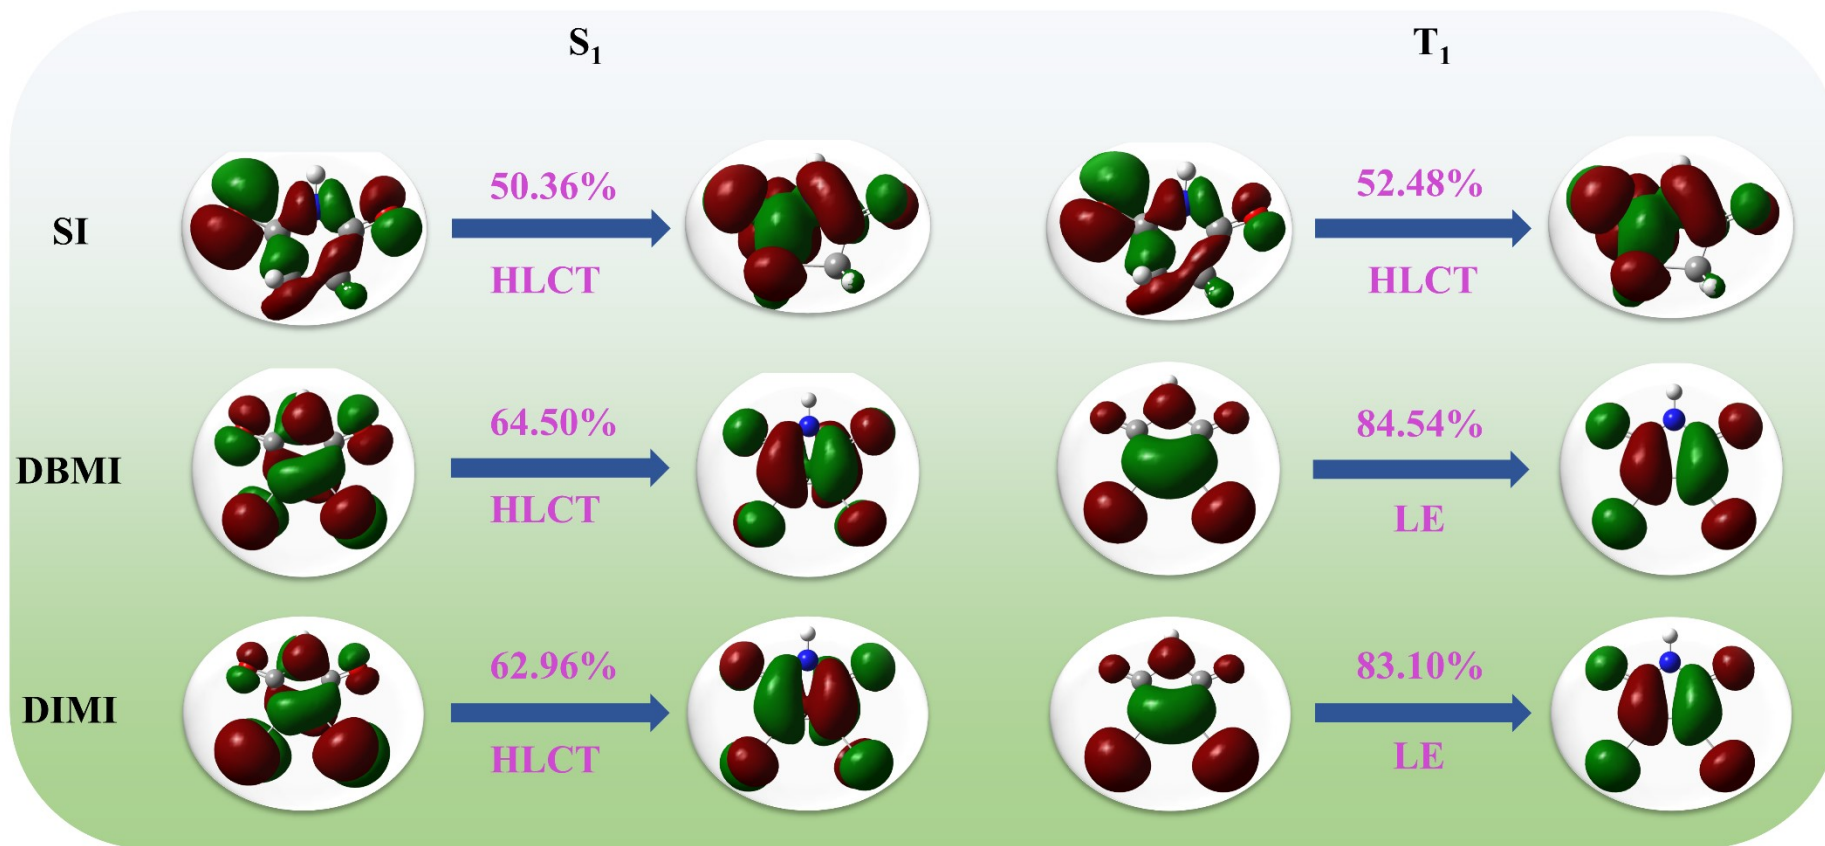

Figure S29. Natural transition orbitals (NTOs) of the  $S_1$  and  $T_1$  states for SI, DBMI and DIMI in THF.

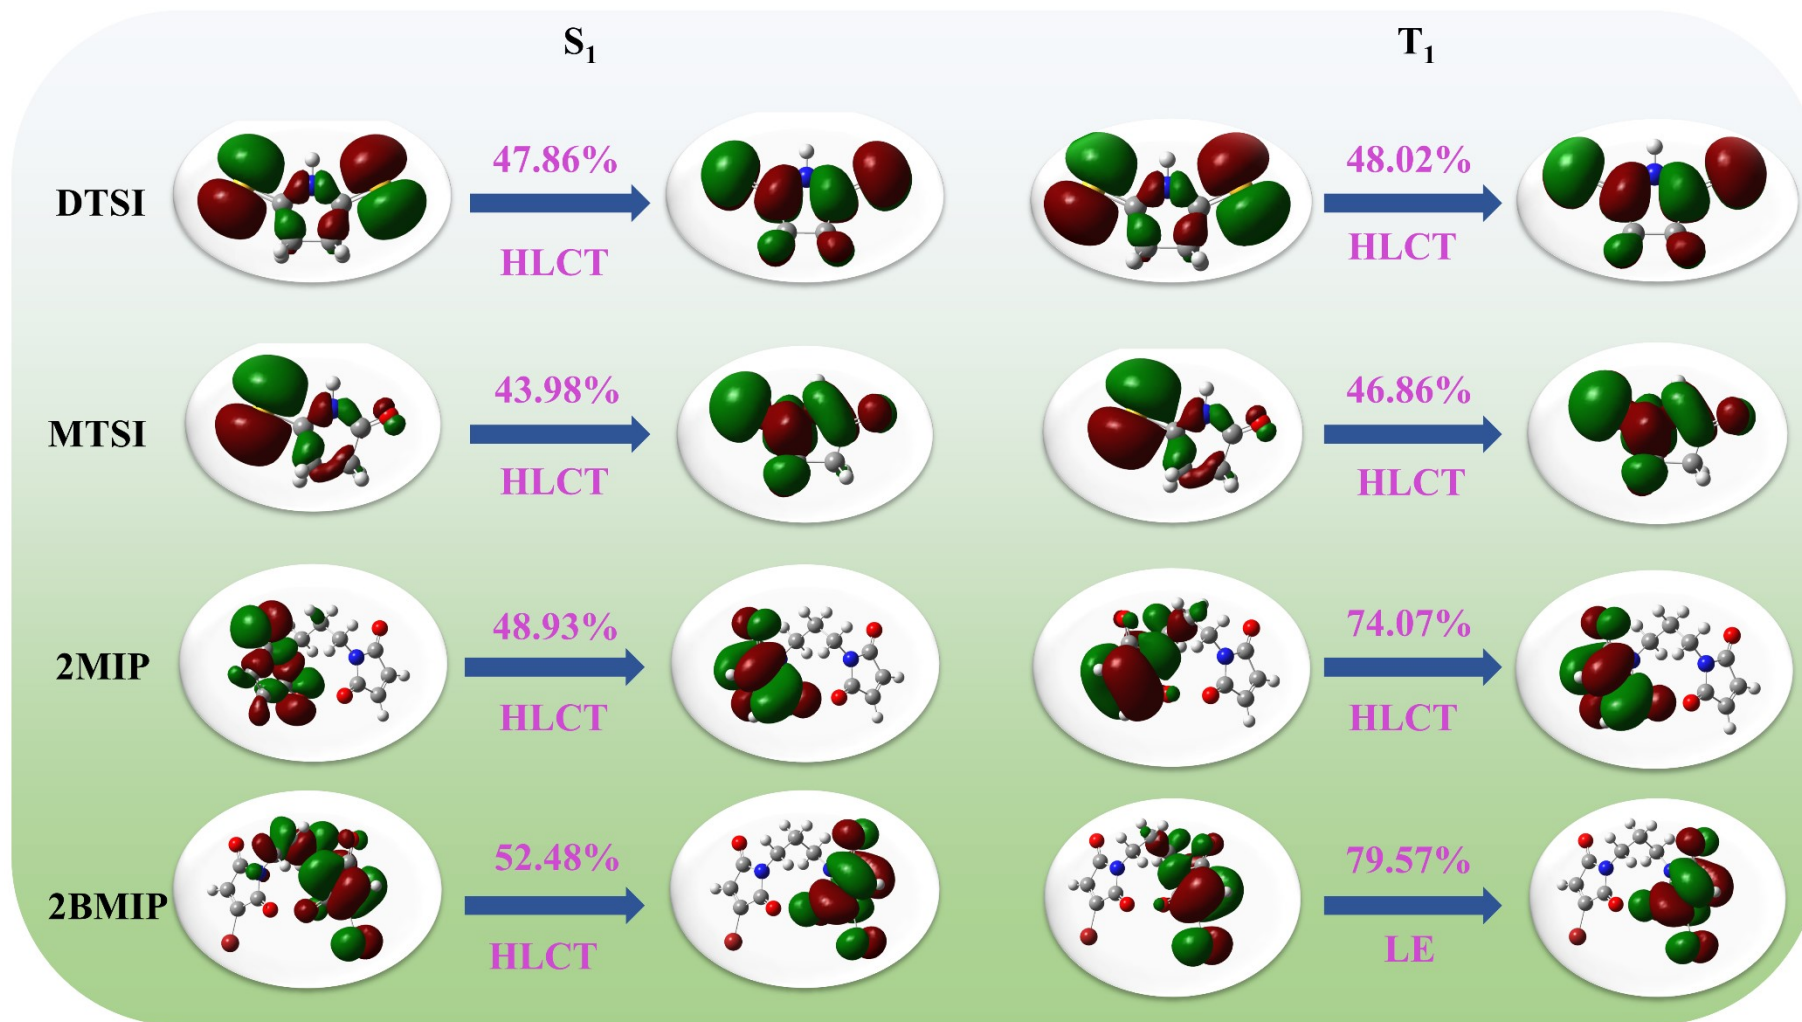

Figure S30. Natural transition orbitals (NTOs) of the  $S_1$  and  $T_1$  states for DTSI, MTSI, 2MIP and 2BMIP in THF.

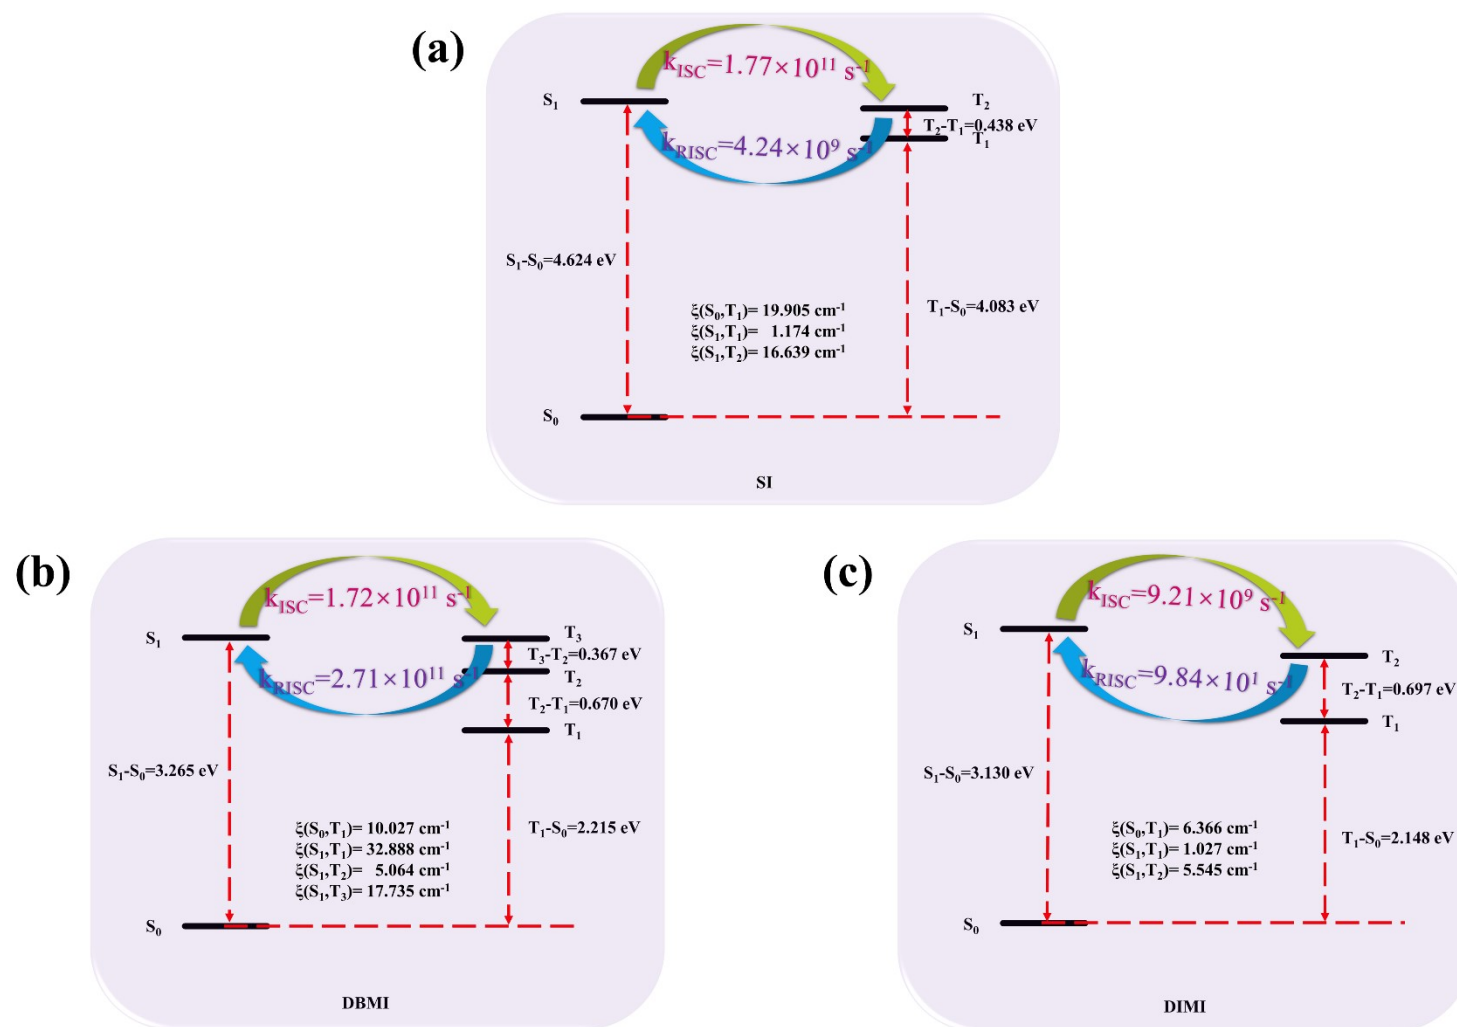

Figure S31. Adiabatic excitation energy diagrams for SI (a), DBMI (b) and DIMI (c) in the solid phase. Corresponding SOC constants are also listed.



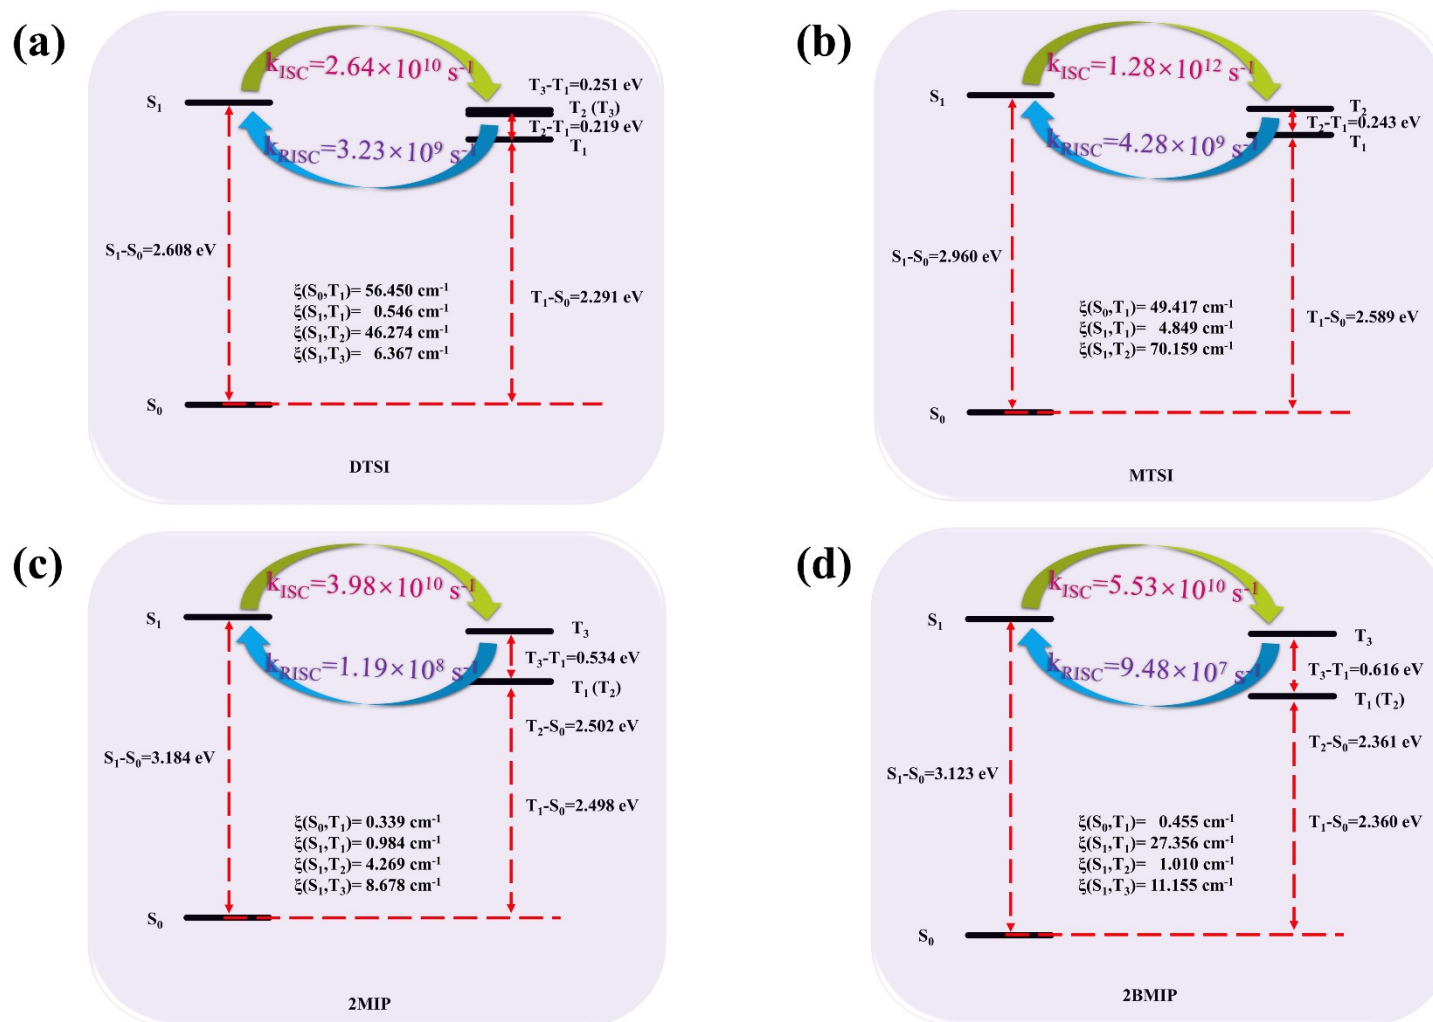

Figure S32. Adiabatic excitation energy diagrams for DTSI (a), MTSI (b), 2MIP (c) and 2BMIP (d) in the solid phase. Corresponding SOC constants are also listed.

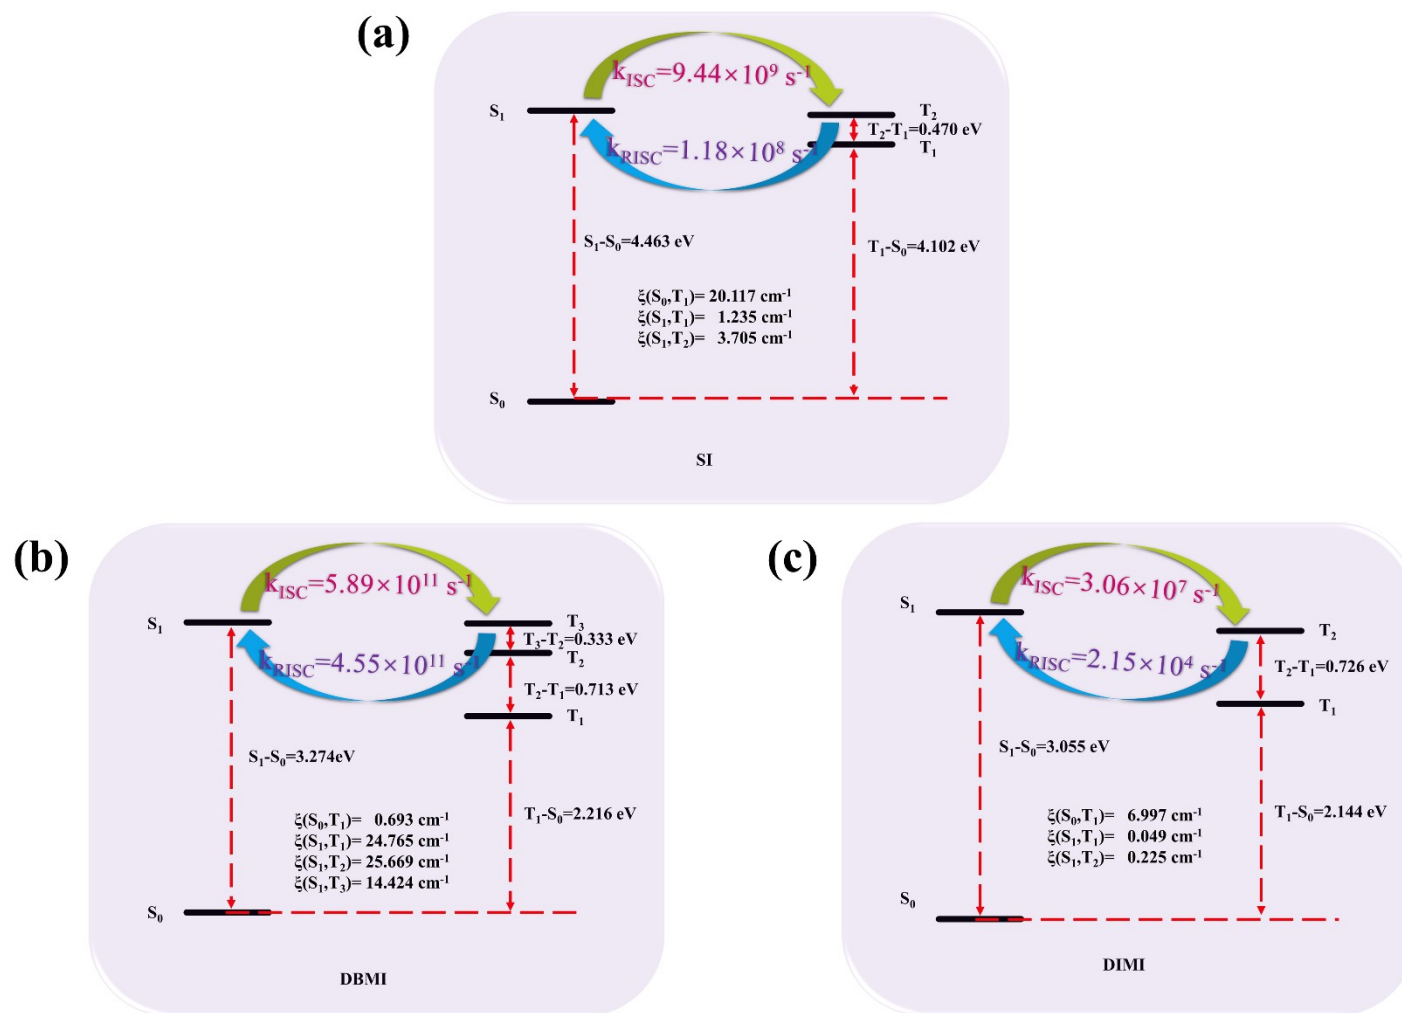

Figure S33. Adiabatic excitation energy diagrams for SI (a), DBMI (b) and DIMI (c) in THF. Corresponding SOC constants are also listed.

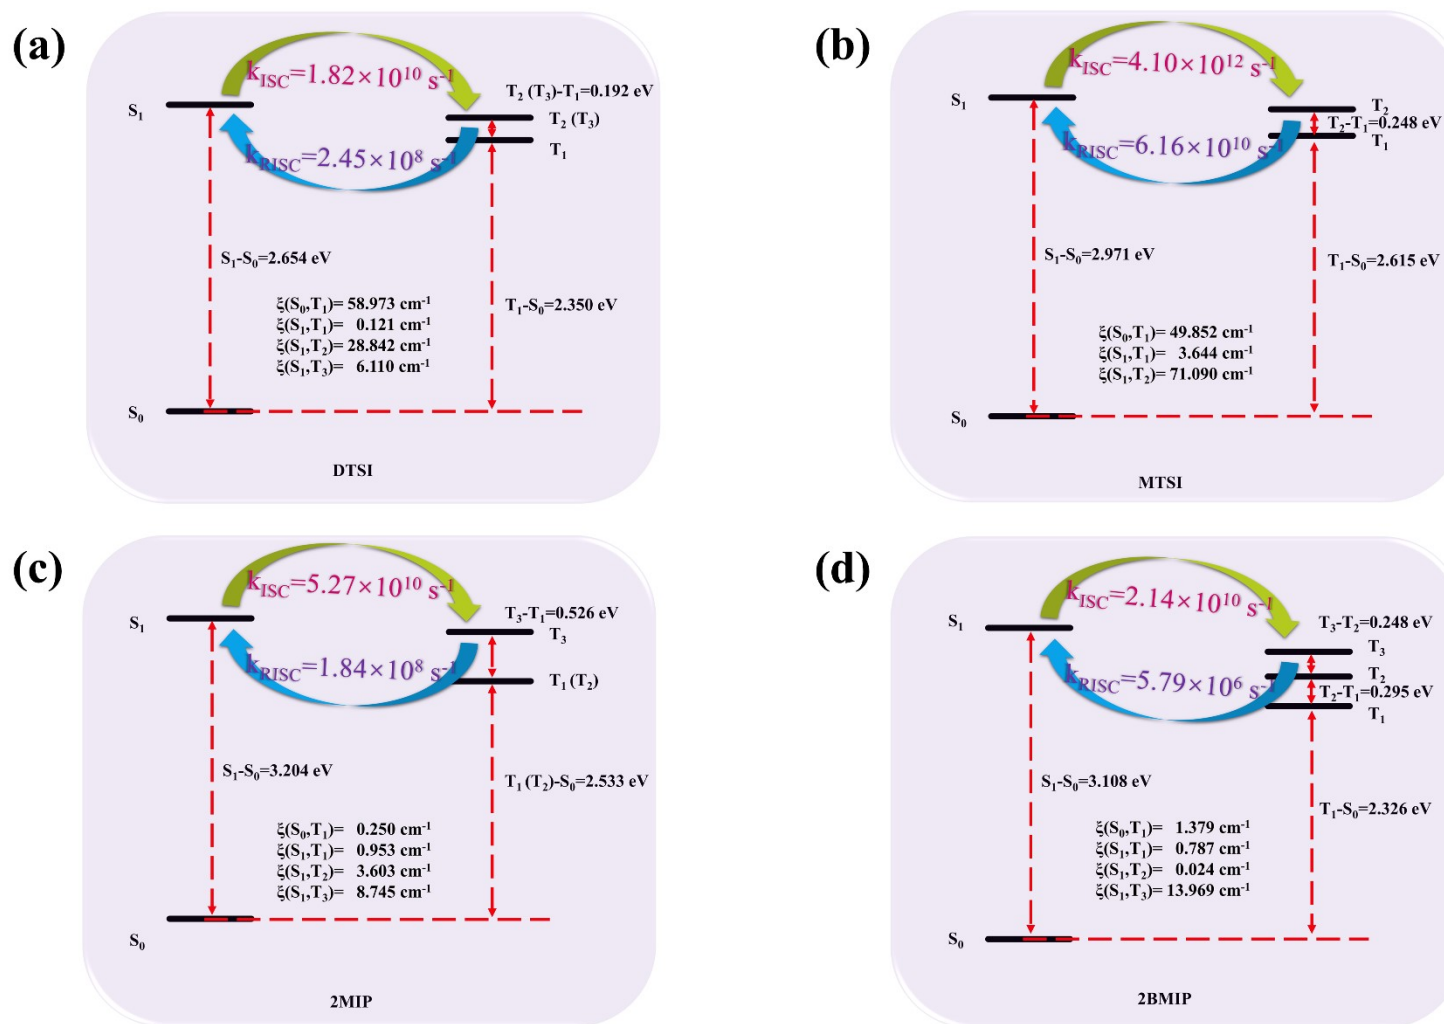

Figure S34. Adiabatic excitation energy diagrams for DTSI (a), MTSI (b), 2MIP (c) and 2BMIP (d) in THF. Corresponding SOC constants are also listed.

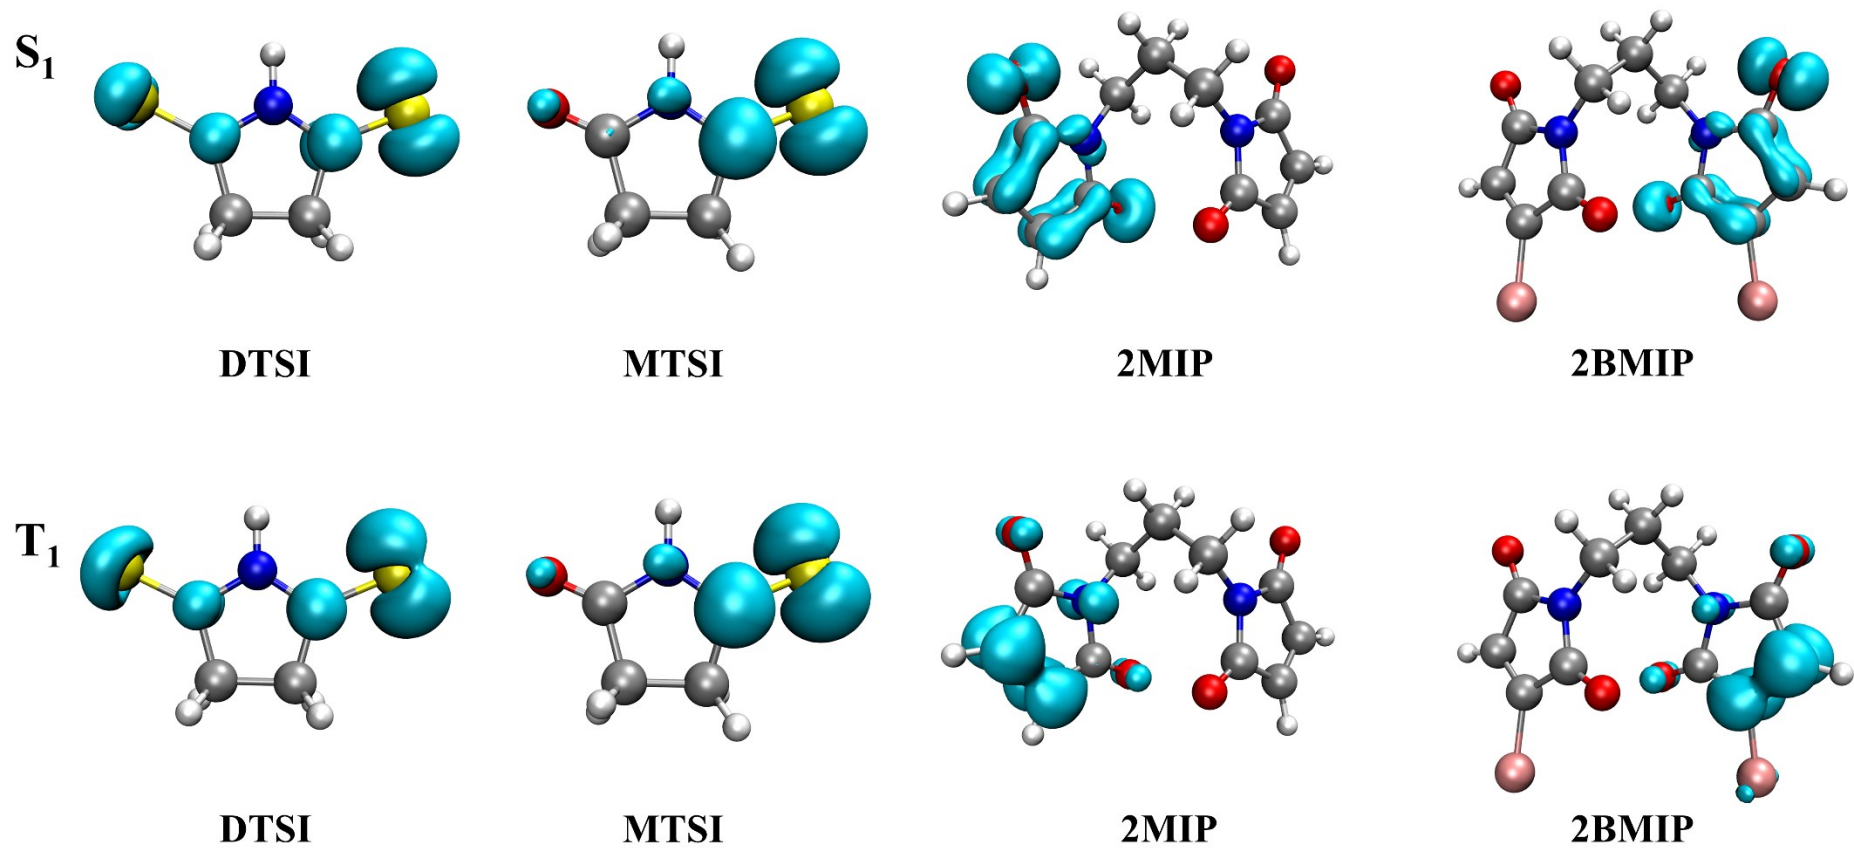

Figure S35. Odd electron density (OED) of the  $S_1$  and  $T_1$  states for DTSI, MTSI, 2MIP and 2BMIP in solid phase.

$S_1$

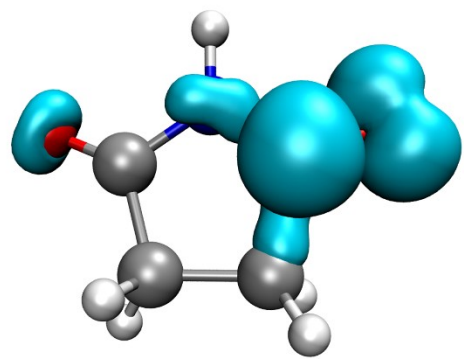

**SI**

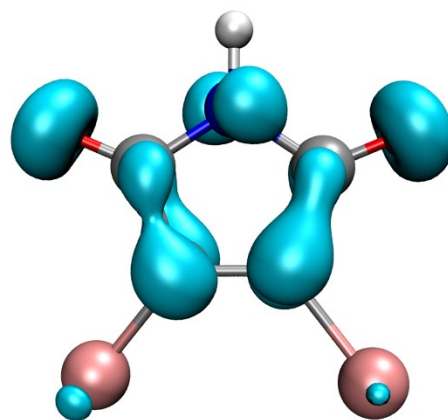

**DBMI**

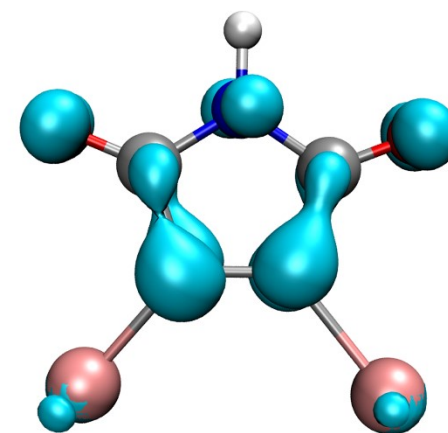

**DIMI**

$T_1$

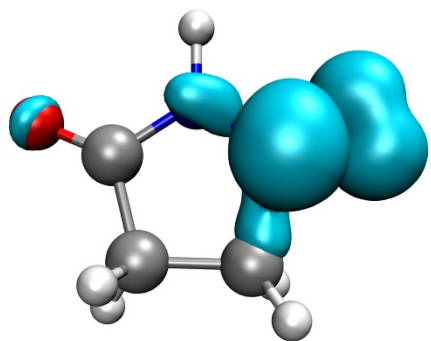

**SI**

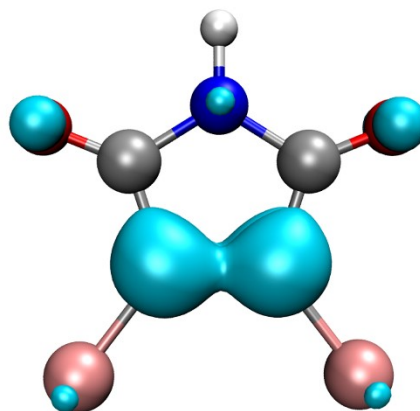

**DBMI**

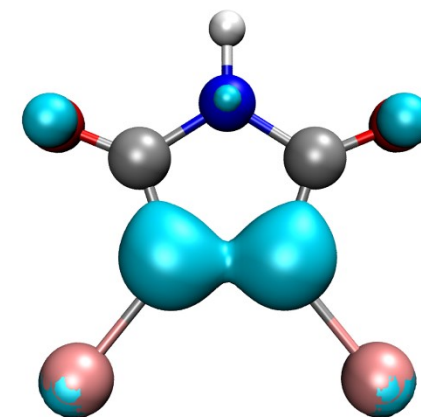

**DIMI**

Figure S36. Odd electron density (OED) of the  $S_1$  and  $T_1$  states for SI, DBMI and DIMI in THF.

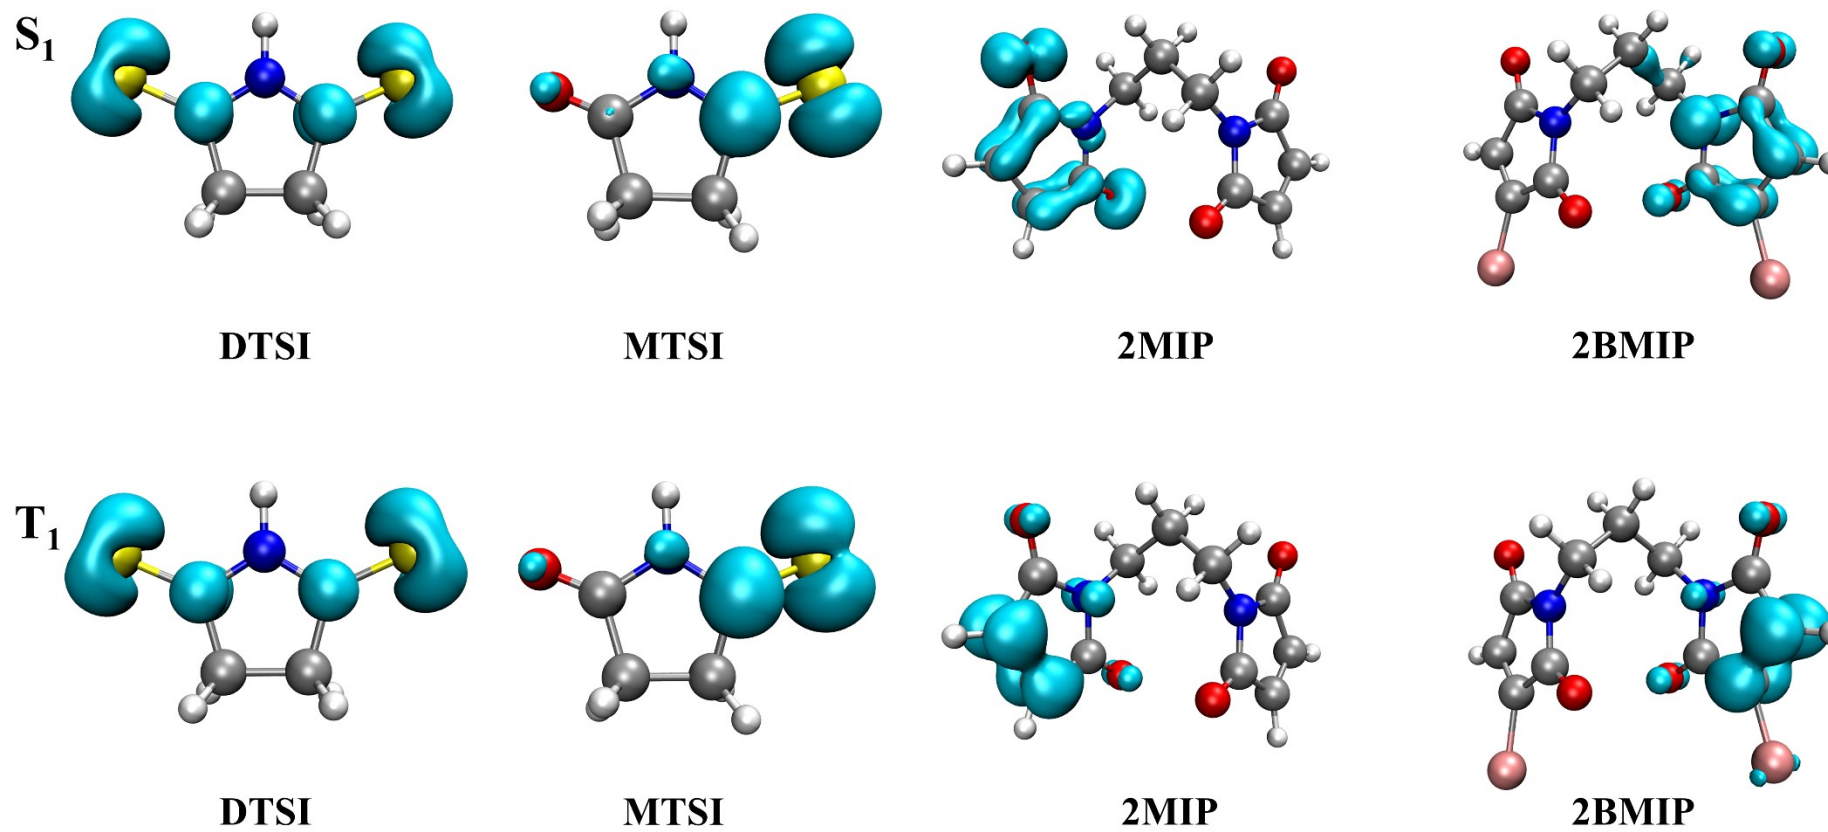

Figure S37. Odd electron density (OED) of the S<sub>1</sub> and T<sub>1</sub> states for DTSI, MTSI, 2MIP and 2BMIP in THF.

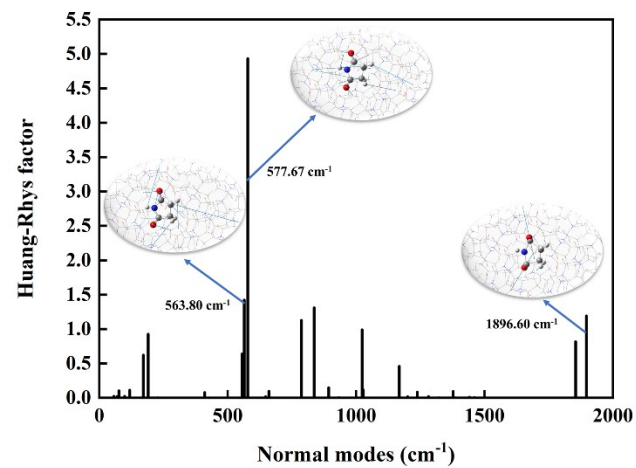

SI

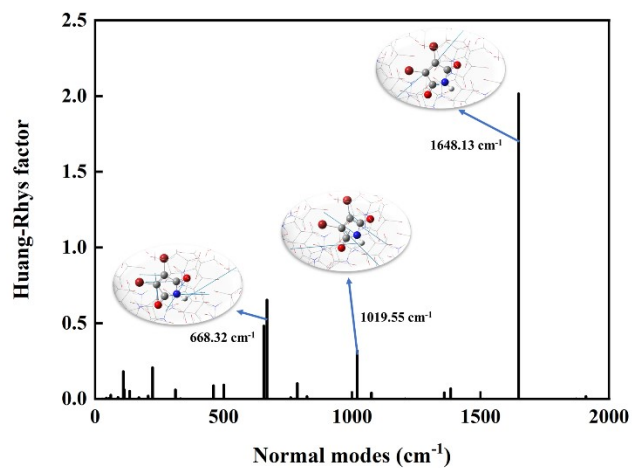

DBMI

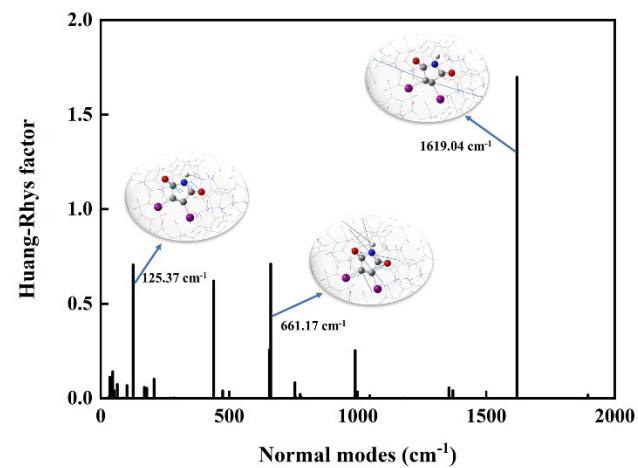

DIMI

Figure S38. Calculated HR factors versus the normal mode frequencies for SI, DBMI and DIMI in solid phase, respectively. Representative vibration modes are shown as insets.

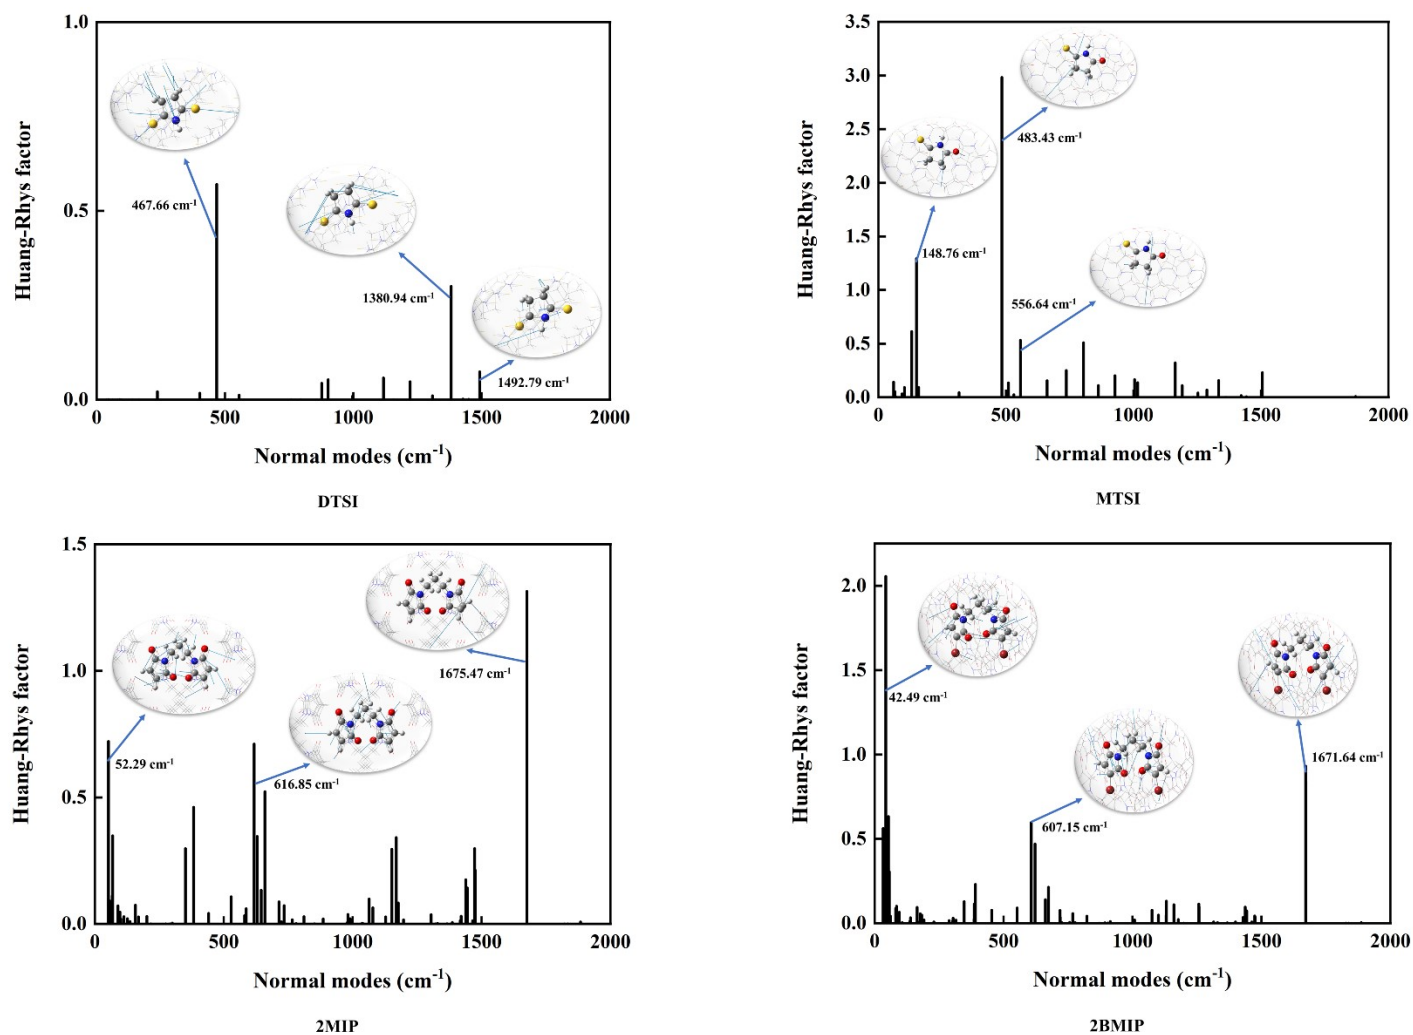

Figure S39. Calculated HR factors versus the normal mode frequencies for DTSI, MTSI, 2MIP and 2BMIP in solid phase, respectively. Representative vibration modes are shown as insets.



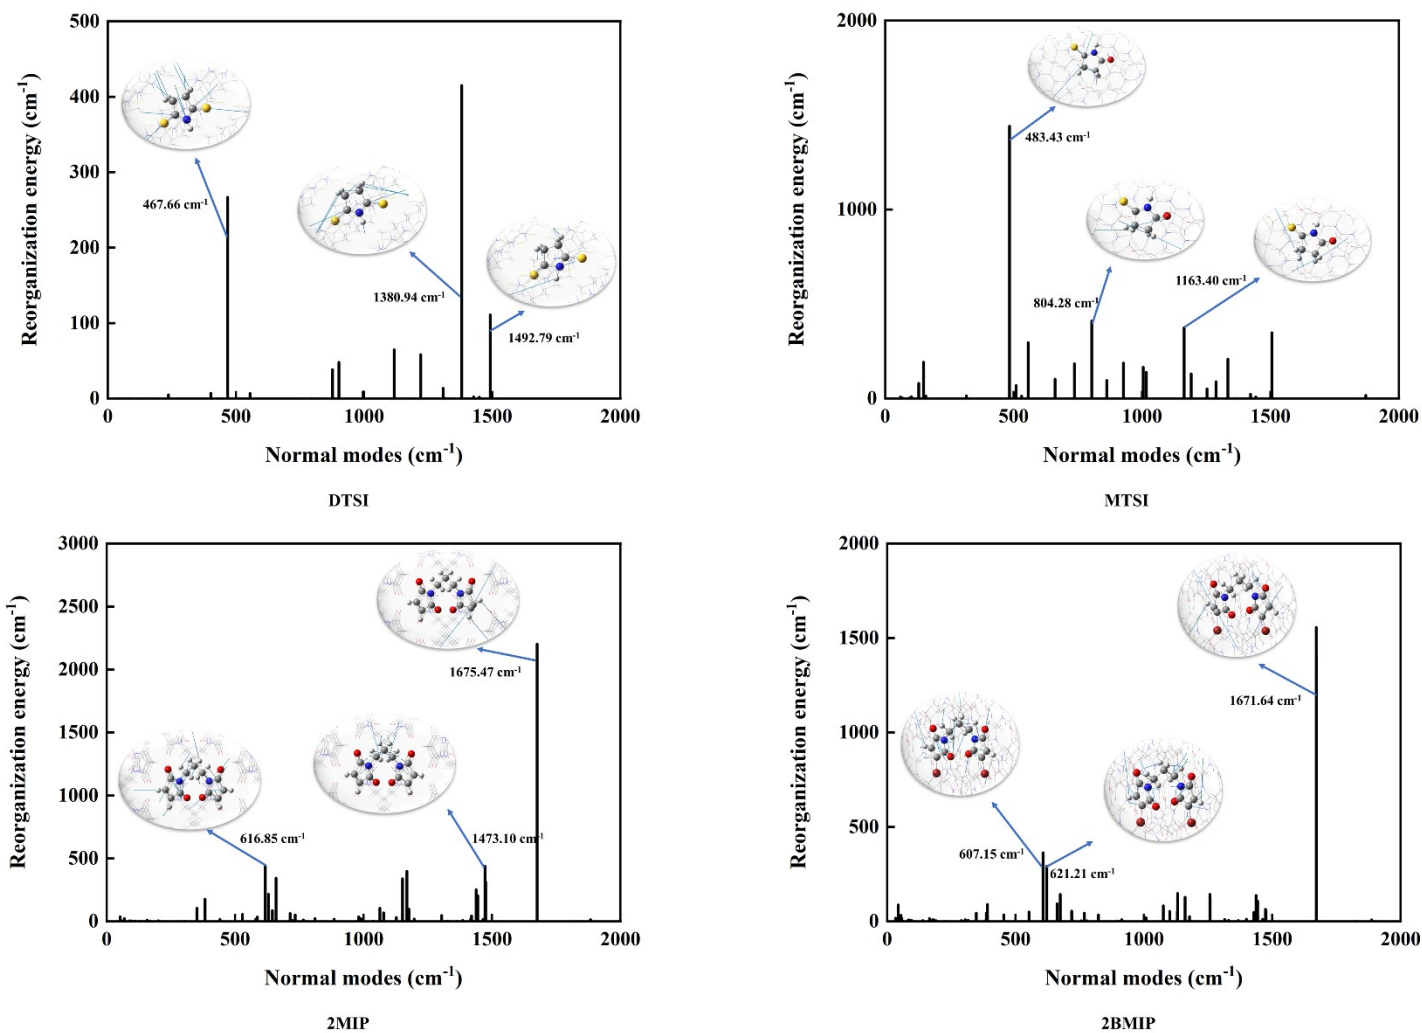

Figure S40. Calculated reorganization energies versus the normal mode frequencies for DTSI, MTSI, 2MIP and 2BMIP in solid phase, respectively. Representative vibration modes are shown as insets.

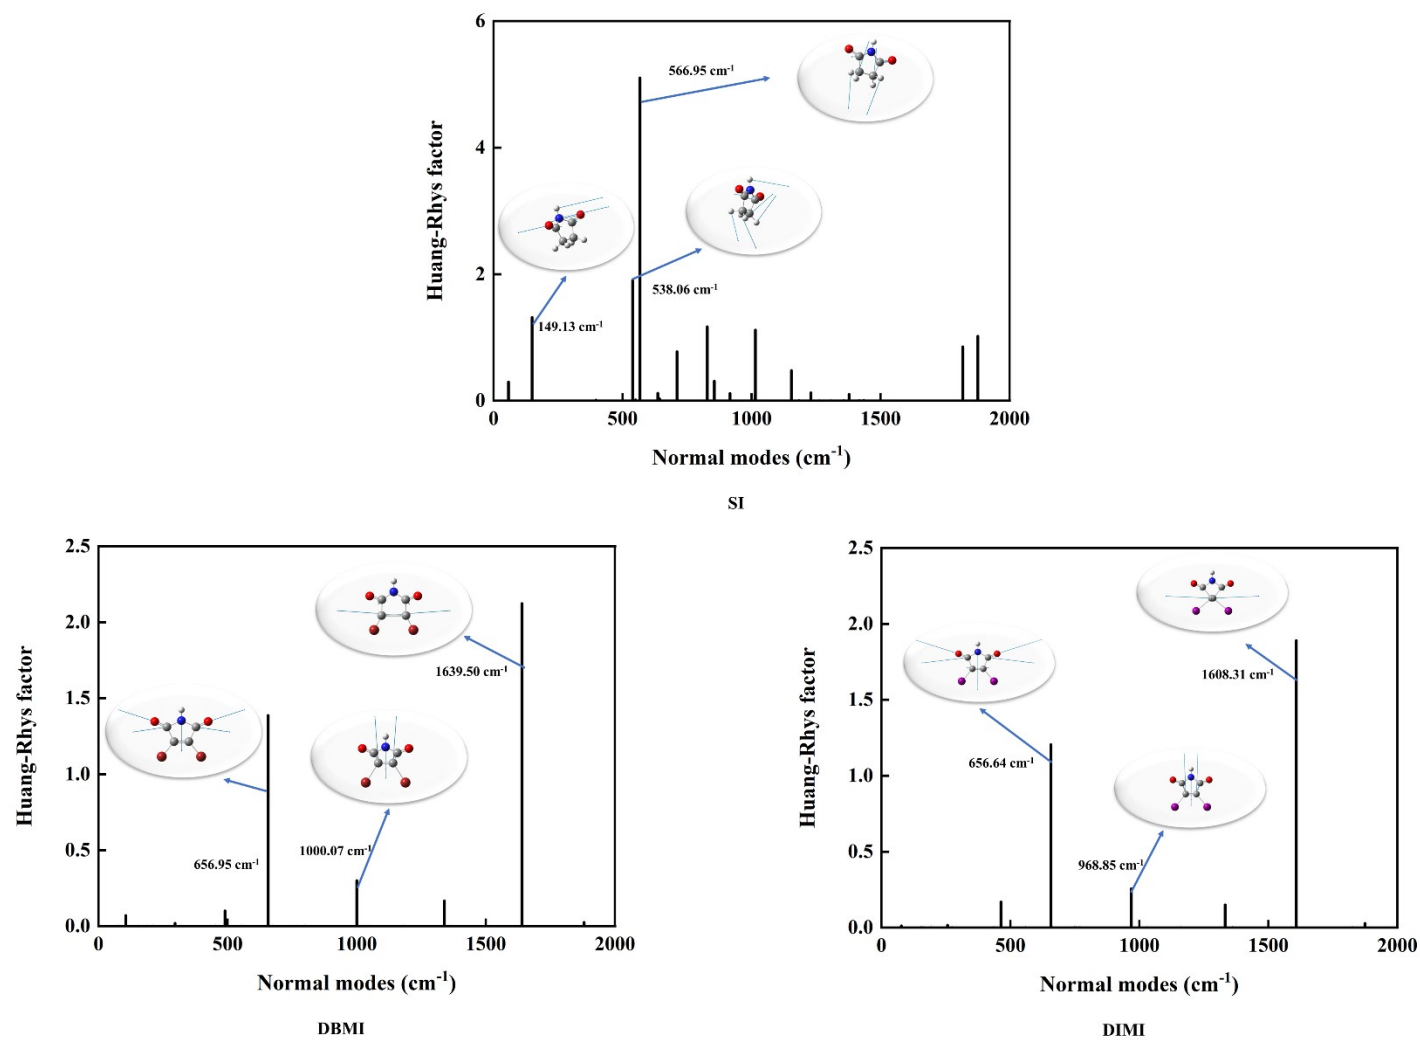

Figure S41. Calculated HR factors versus the normal mode frequencies for SI, DBMI and DIMI in THF, respectively. Representative vibration modes are shown as insets.

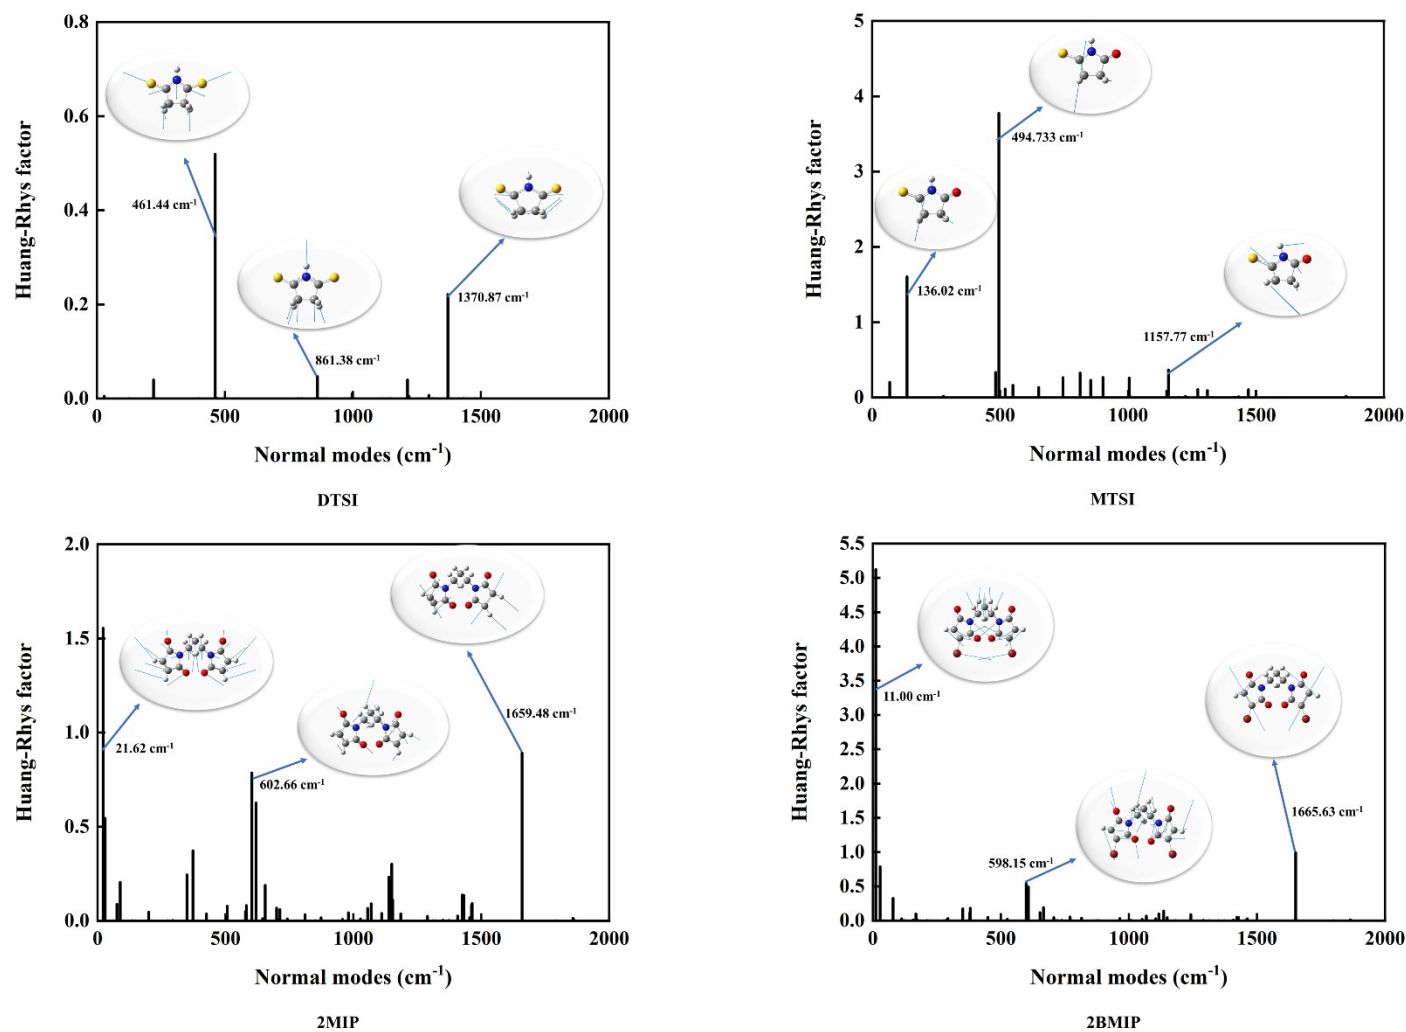

Figure S42. Calculated HR factors versus the normal mode frequencies for DTSI, MTSI, 2MIP and 2BMIP in THF, respectively. Representative vibration modes are shown as insets.

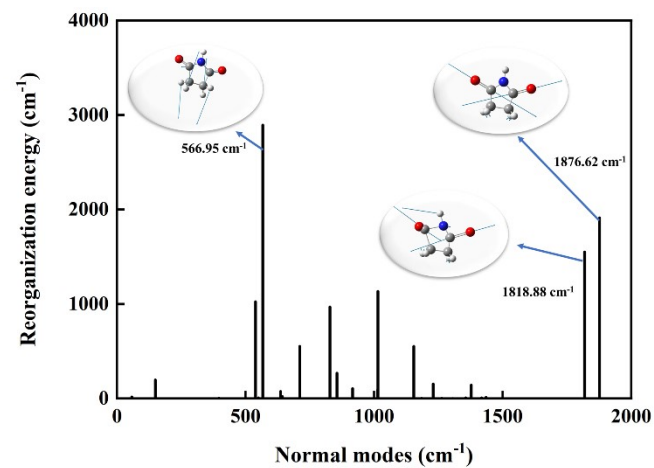

SI

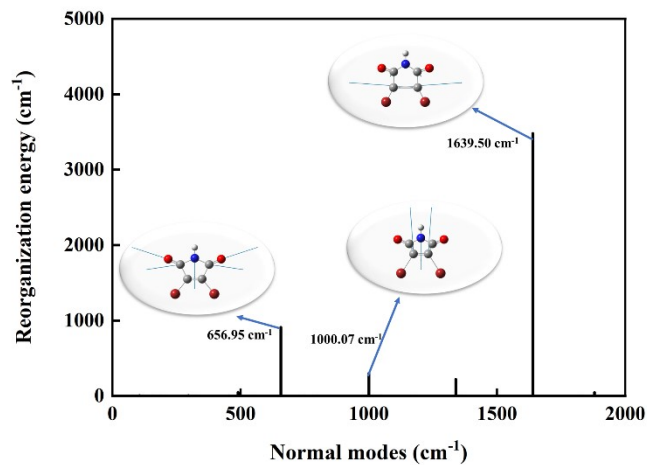

DBMI

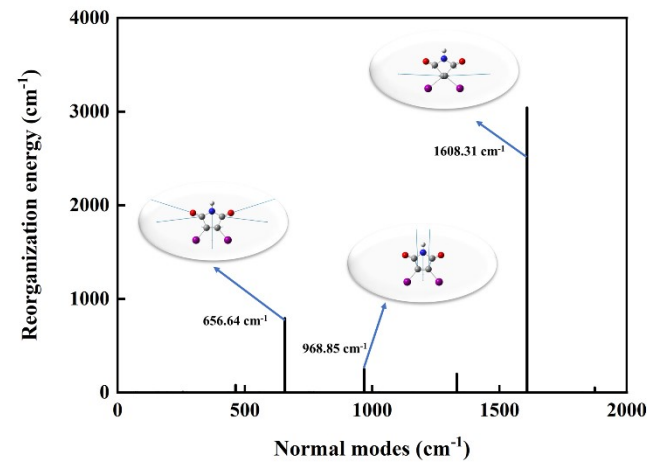

DIMI

Figure S43. Calculated reorganization energies versus the normal mode frequencies for SI, DBMI and DIMI in THF, respectively. Representative vibration modes are shown as insets.

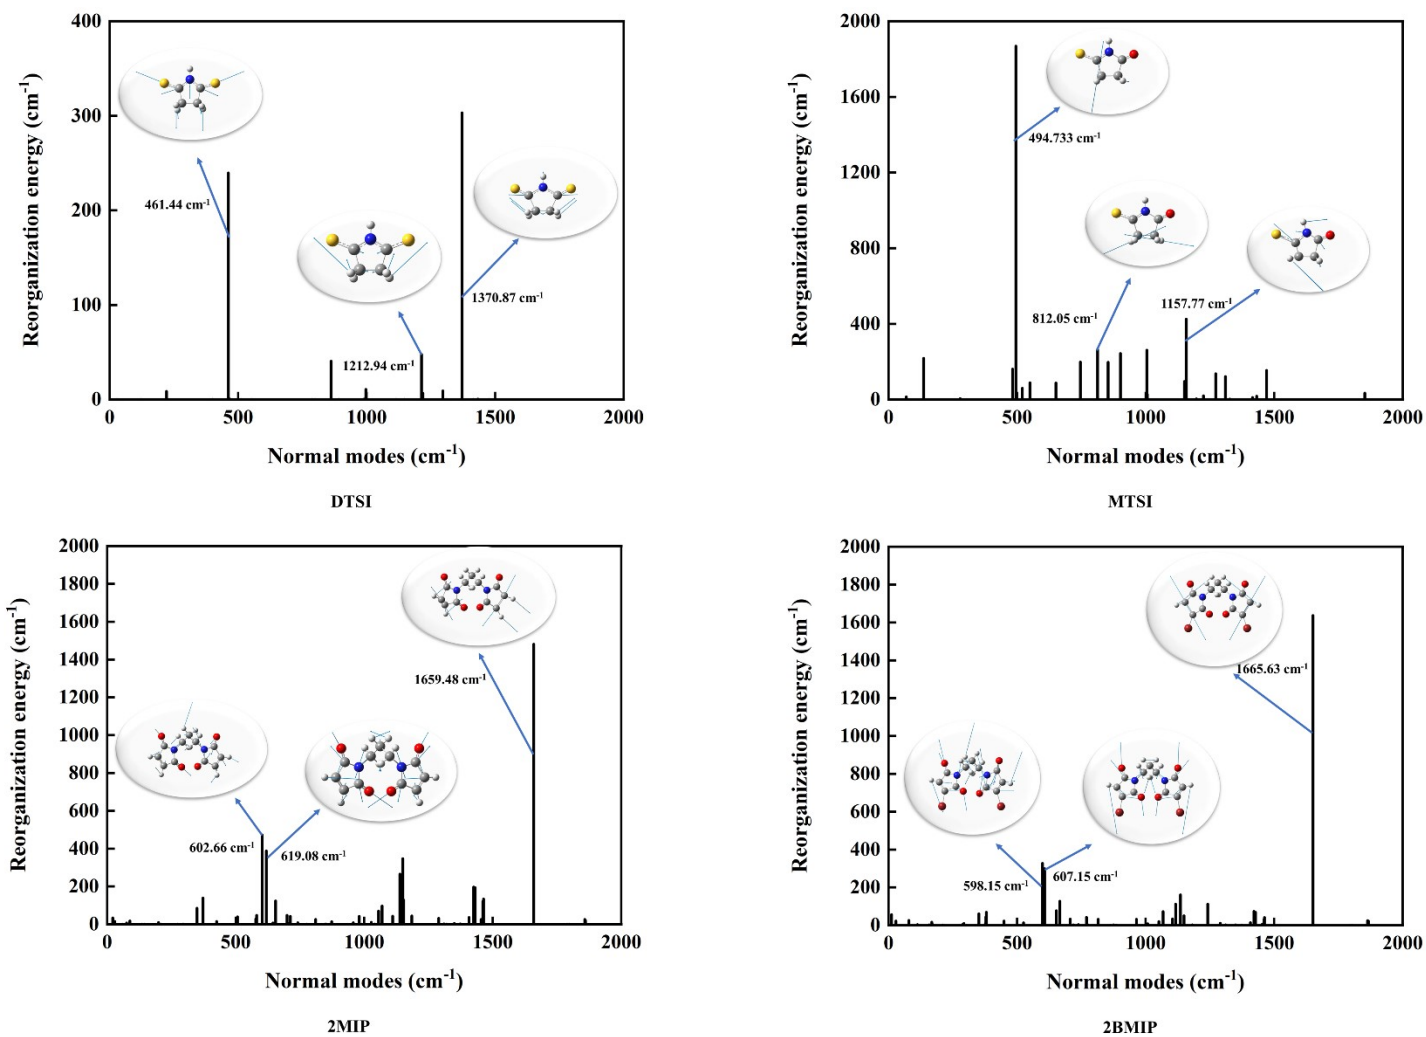

Figure S44. Calculated reorganization energies versus the normal mode frequencies for DTSI, MTSI, 2MIP and 2BMIP in THF, respectively. Representative vibration modes are shown as insets.

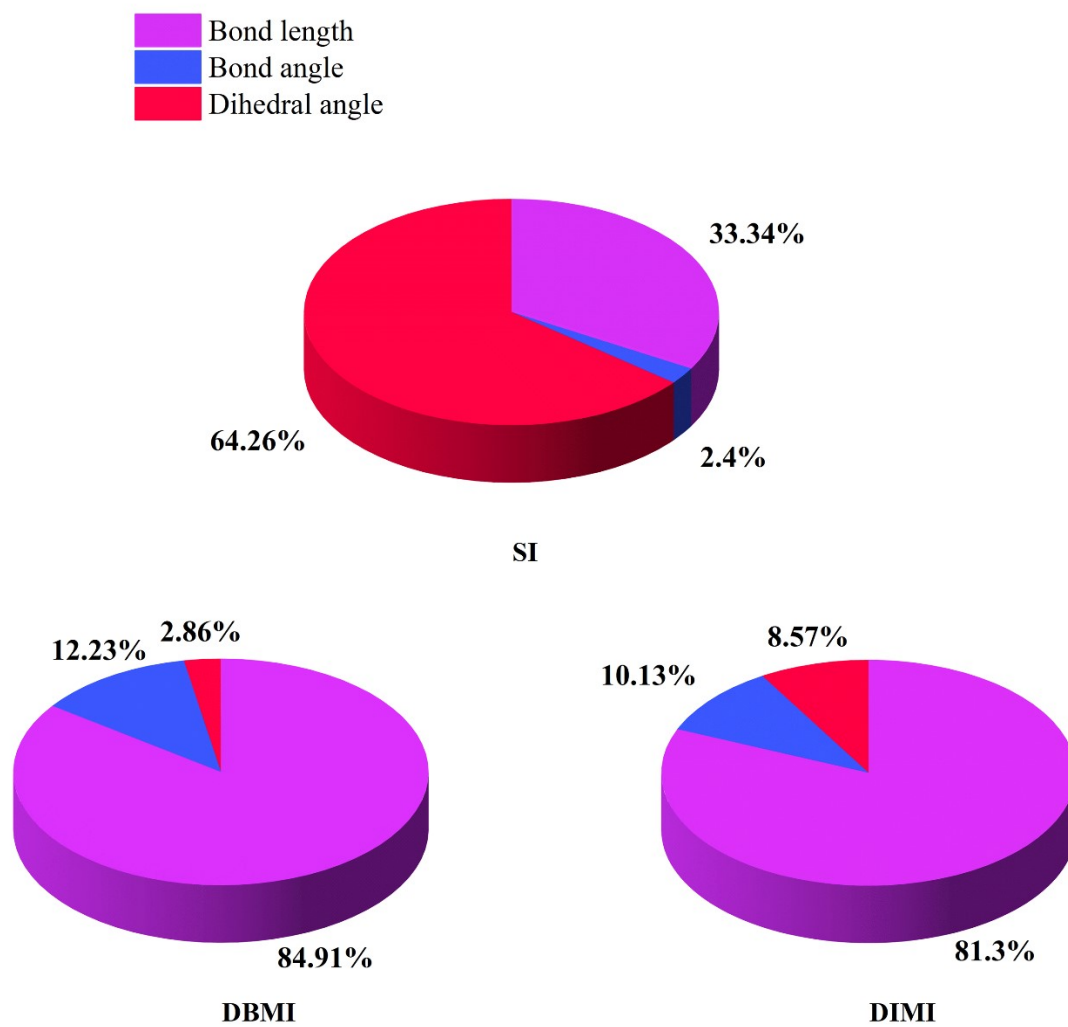

Figure S45. Contribution to the reorganization energy from bond length (purple), bond angle (blue) and dihedral angle (red) in solid phase for SI, DBMI and DIMI, respectively.

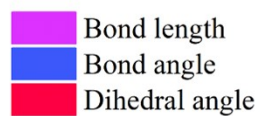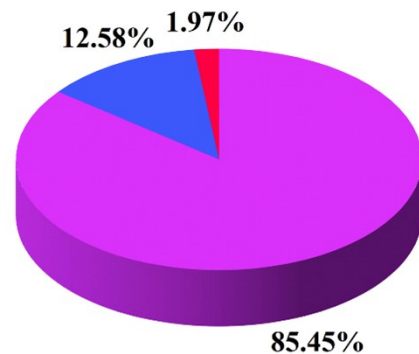

DTSI

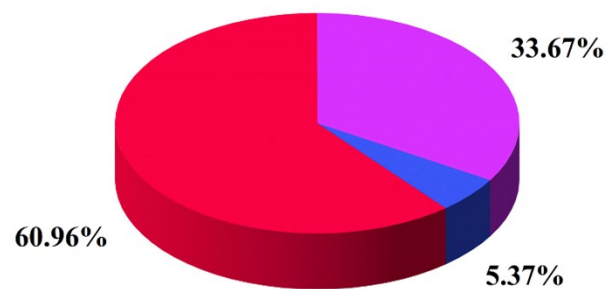

MTSI

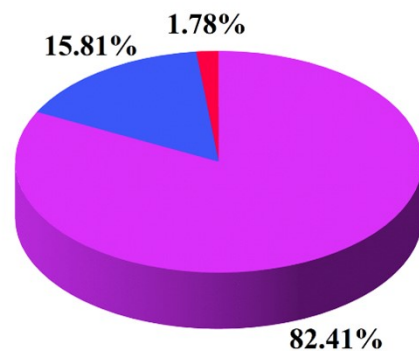

2MIP

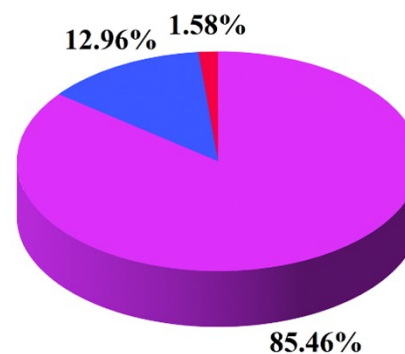

2BMIP

Figure S46. Contribution to the reorganization energy from bond length (purple), bond angle (blue) and dihedral angle (red) in solid phase for DTSI, MTSI, 2MIP and 2BMIP, respectively.

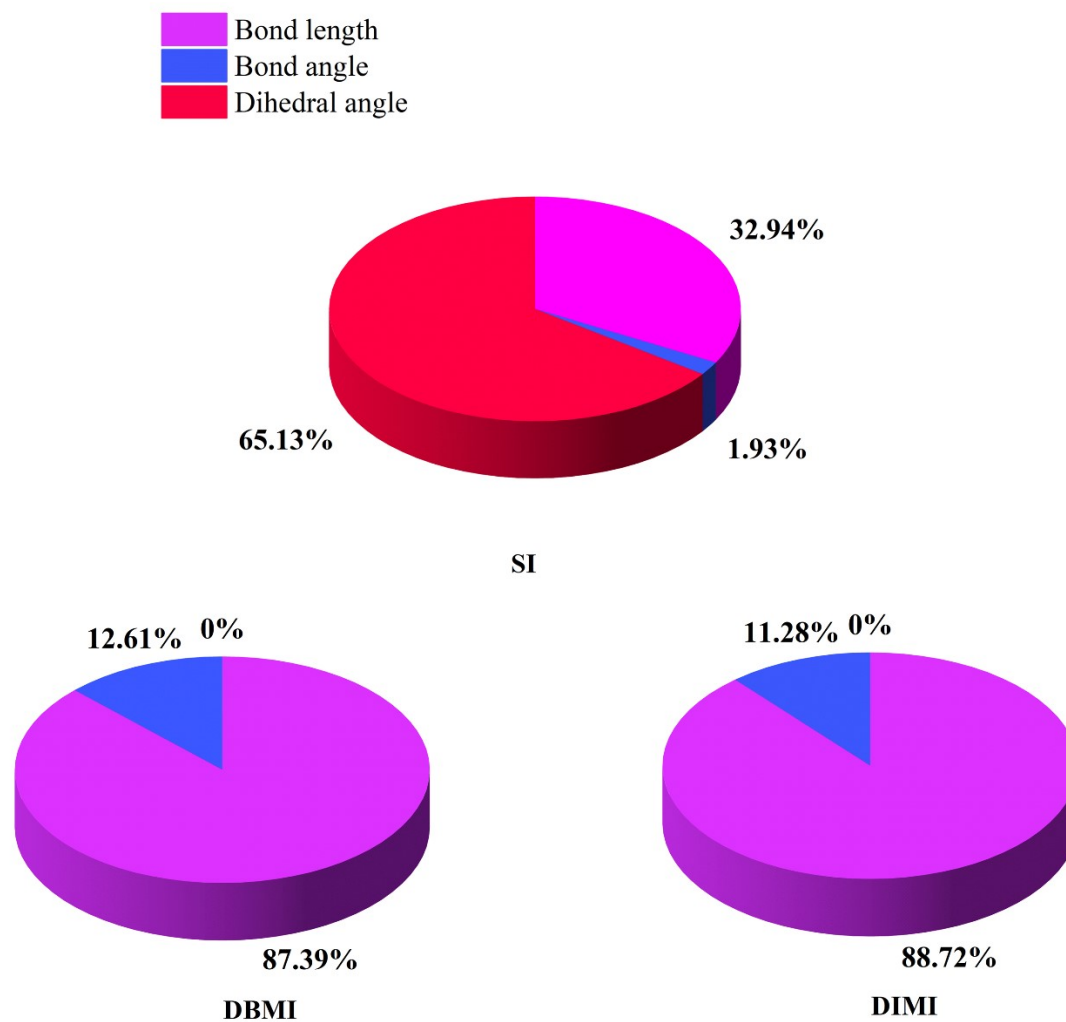

Figure S47. Contribution to the reorganization energy from bond length (purple), bond angle (blue) and dihedral angle (red) in THF for SI, DBMI and DIMI, respectively.



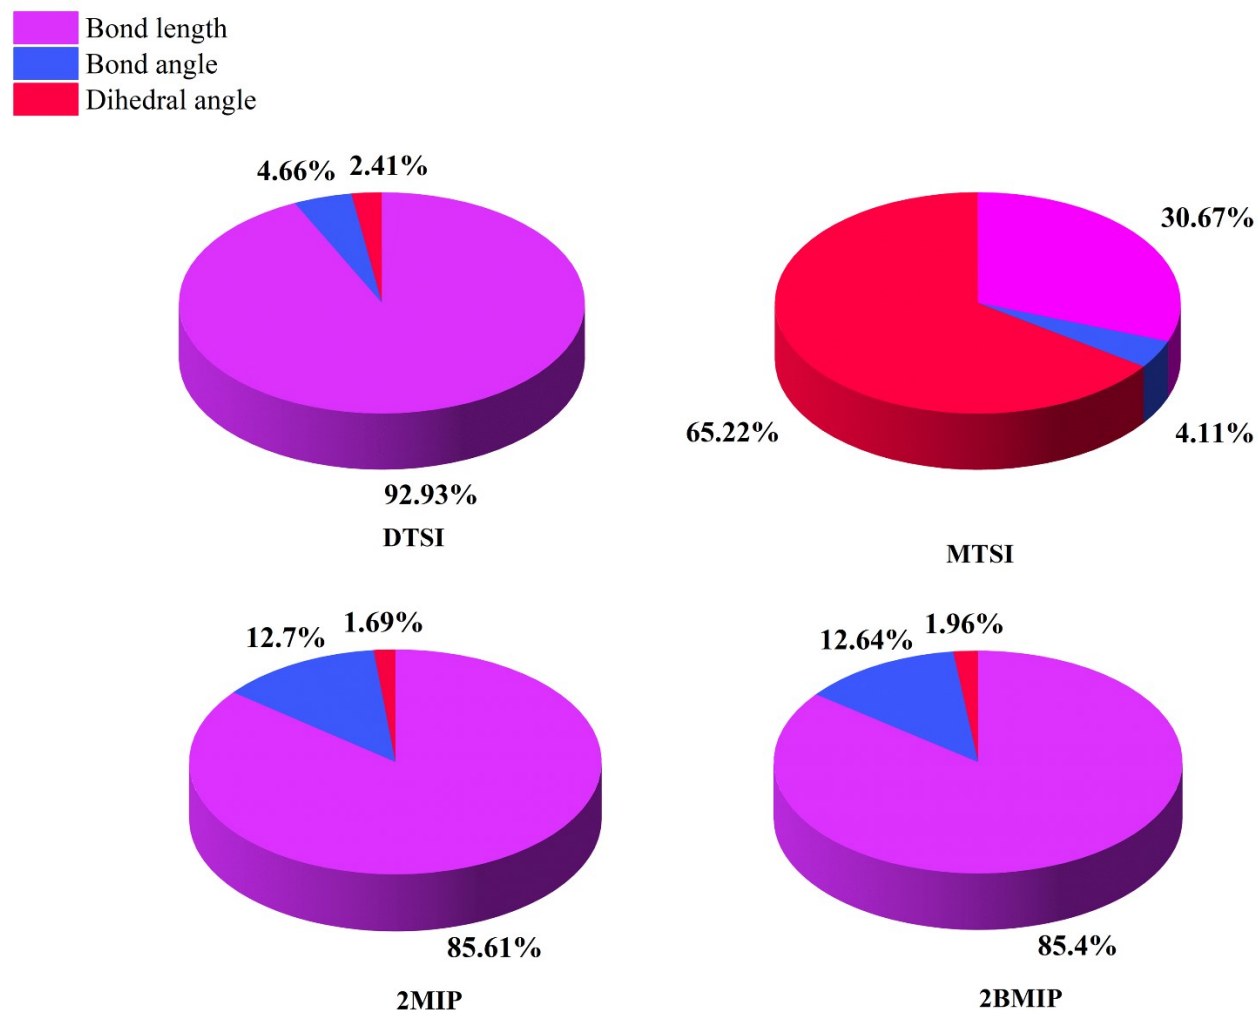

Figure S48. Contribution to the reorganization energy from bond length (purple), bond angle (blue) and dihedral angle (red) in THF for DTSI, MTSI, 2MIP and 2BMIP, respectively.

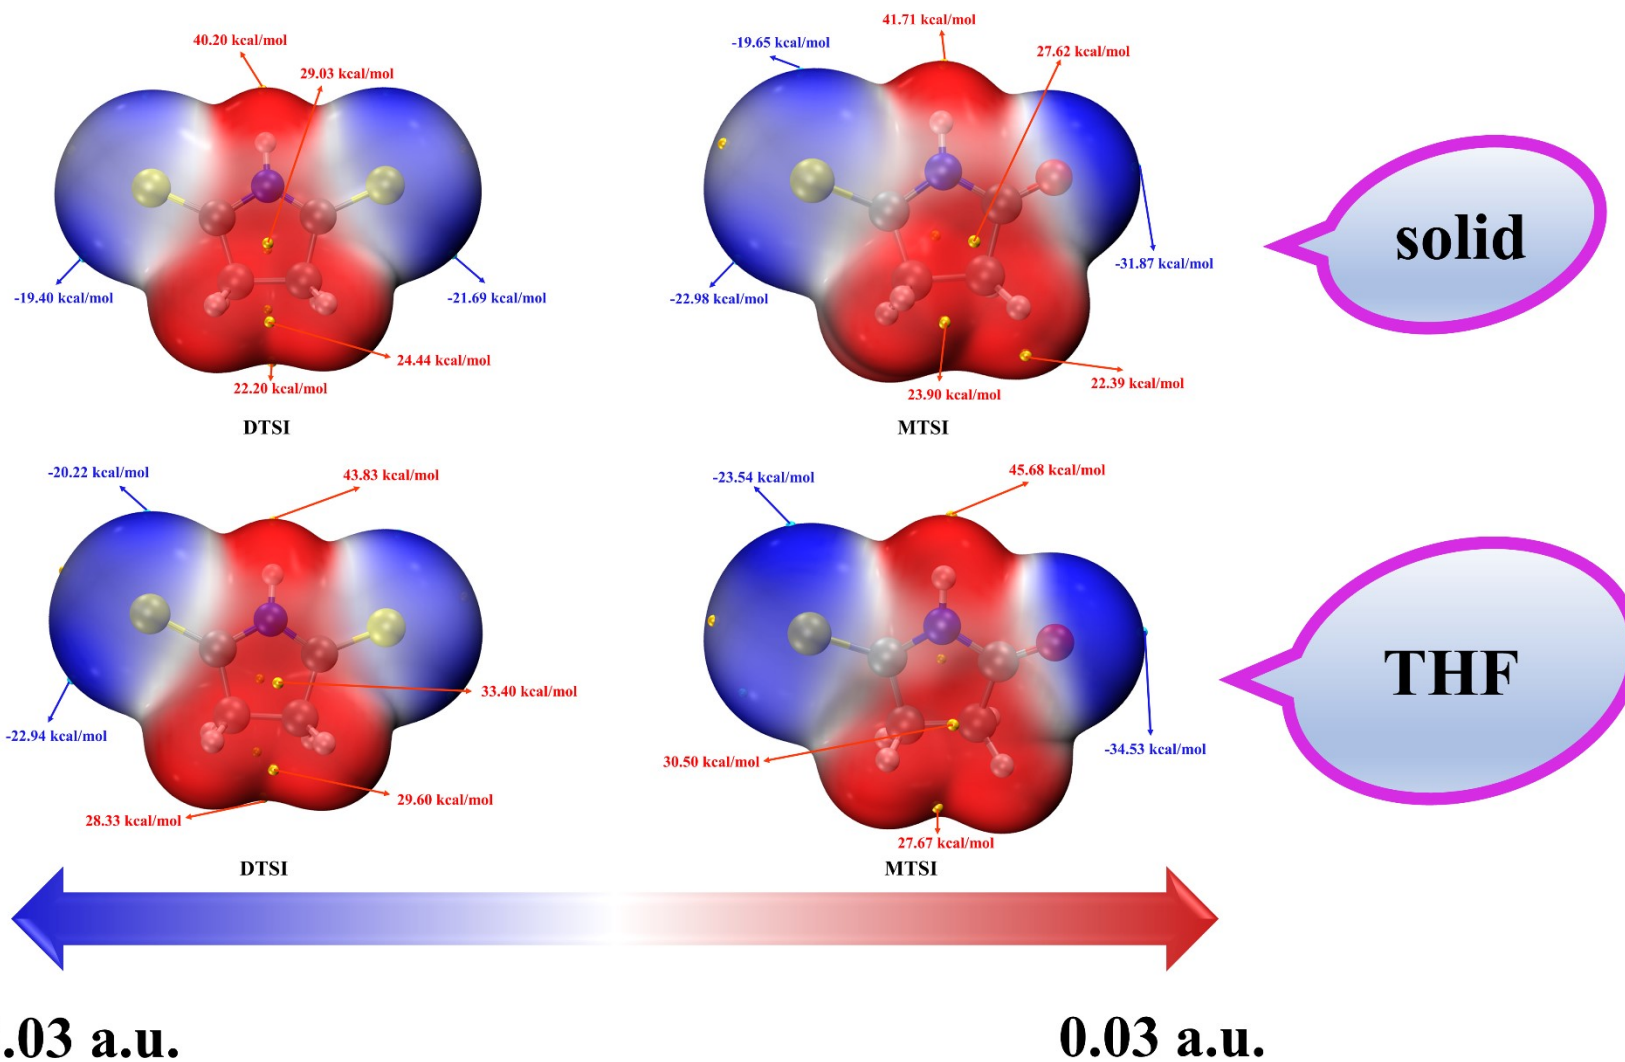

Figure S49. Electrostatic potential (ESP) maps of DTSI and MTSI in solid phase and THF.

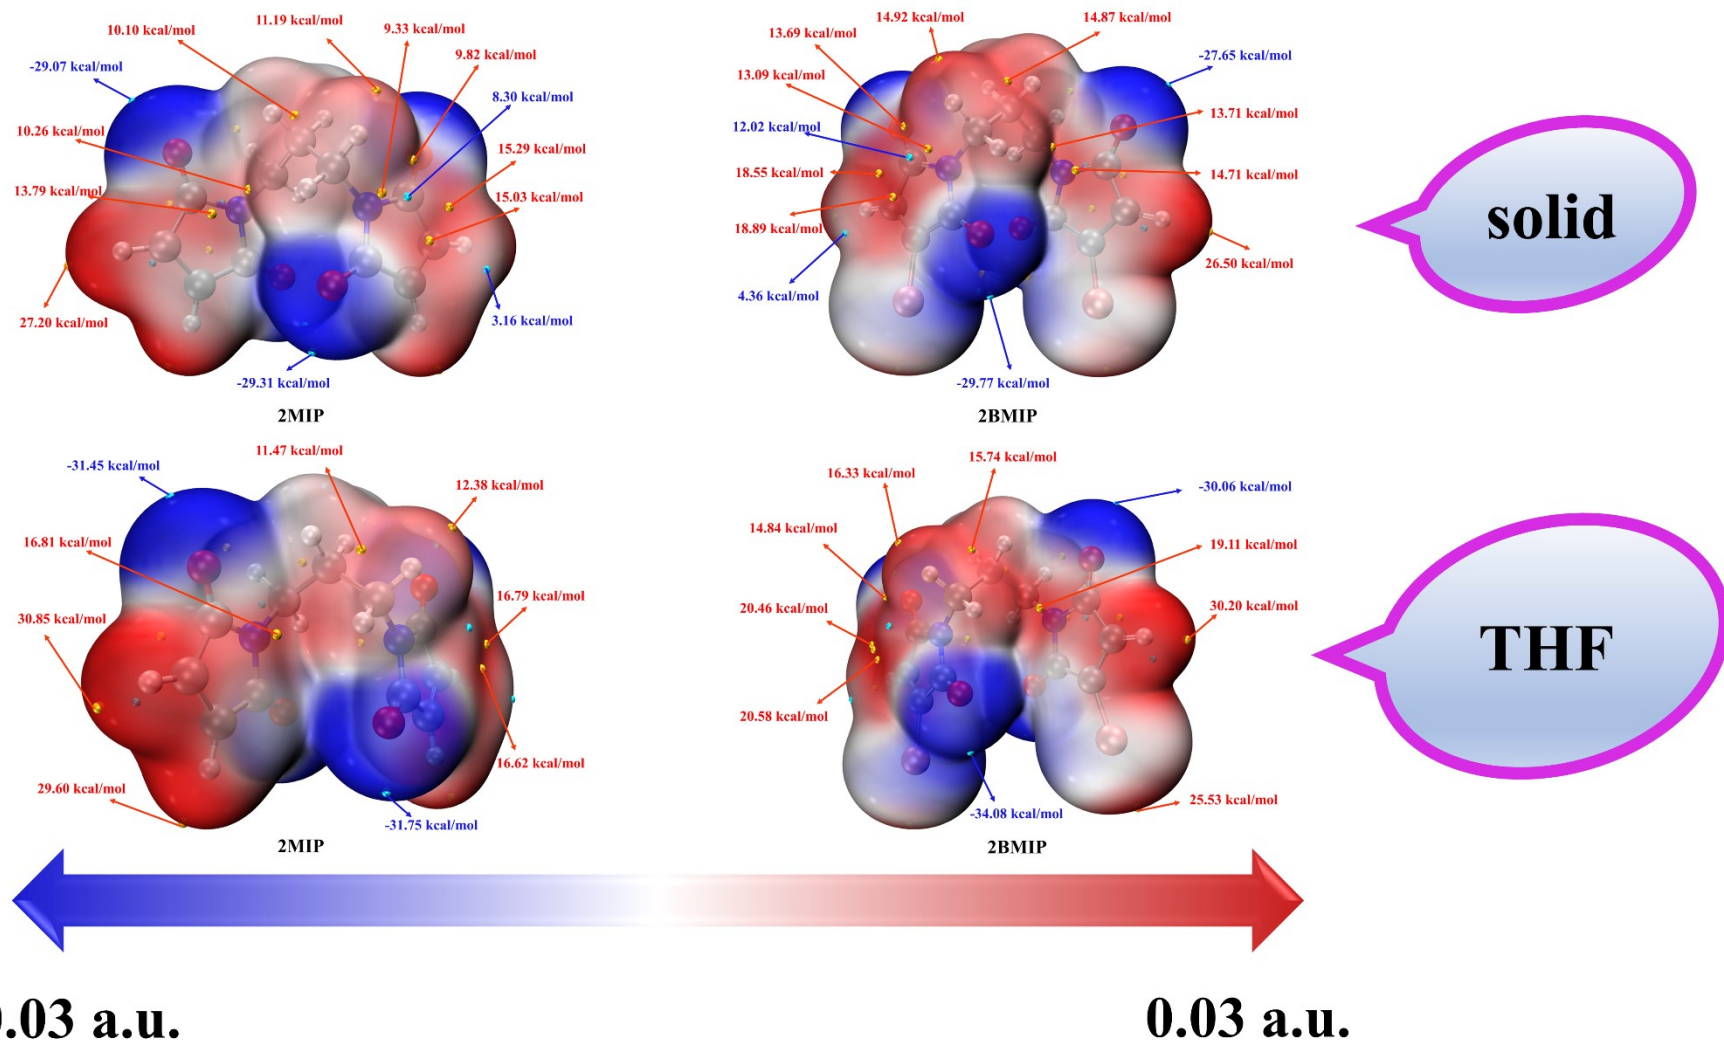

Figure S50. Electrostatic potential (ESP) maps of 2MIP and 2BMIP in solid phase and THF.

Table S1. Emission wavelengths (nm) of S<sub>1</sub> and T<sub>1</sub> calculated by different functionals for SI, DBMI and DIMI in solid phase.

|                |      | B3LYP  | BMK    | Cam-B3LYP | M062X  | PBE0   | WB97XD | Exp <sup>a</sup> |
|----------------|------|--------|--------|-----------|--------|--------|--------|------------------|
| S <sub>1</sub> | SI   | 367.74 | 356.39 | 348.14    | 378.56 | 354.76 | 335.13 | 375、455          |
|                | DBMI | 445.75 | 384.91 | 388.25    | 374.36 | 424.57 | 394.92 | 455              |
|                | DIMI | 452.59 | 404.84 | 400.72    | 392.10 | 435.94 | 407.27 | 480              |
| T <sub>1</sub> | SI   | 470.93 | 457.92 | 456.12    | 463.99 | 427.67 | 447.66 | 535              |
|                | DBMI | 726.09 | 683.35 | 750.13    | 635.39 | 731.73 | 736.05 | 630、690          |
|                | DIMI | 740.31 | 700.03 | 754.19    | 634.38 | 746.48 | 747.49 | 665、745          |

<sup>a</sup> Experimental data the photoinduced processes under UV irradiation.

Table S2. Intermolecular interaction energy analysis for selected dimers extracted from the crystal of SI.

|    |         | Electrostatic | Repulsion | Dispersion | Total         |
|----|---------|---------------|-----------|------------|---------------|
| SI | Dimer-1 | -1.26         | 2.58      | -7.37      | -6.02 kJ/mol  |
|    | Dimer-2 | -1.92         | 117.87    | -32.30     | 83.66 kJ/mol  |
|    | Dimer-3 | -4.51         | 7.37      | -17.45     | -14.60 kJ/mol |
|    | Dimer-4 | -2.20         | 5.12      | -12.82     | -9.90 kJ/mol  |
|    | Dimer-5 | 0.51          | 16.24     | -25.19     | -8.44 kJ/mol  |

Table S3. Intermolecular interaction energy analysis for selected dimers extracted from the crystal of DBMI.

|      |         | Electrostatic | Repulsion | Dispersion | Total         |
|------|---------|---------------|-----------|------------|---------------|
| DBMI | Dimer-1 | -0.22         | 13.86     | -29.03     | -15.39 kJ/mol |
|      | Dimer-2 | -0.24         | 8.76      | -12.70     | -4.17 kJ/mol  |
|      | Dimer-3 | -0.04         | 5.13      | -12.92     | -7.83 kJ/mol  |
|      | Dimer-4 | -1.09         | 51.66     | -18.03     | 32.55 kJ/mol  |
|      | Dimer-5 | 0.32          | 14.89     | -30.66     | -15.45 kJ/mol |

Table S4. Intermolecular interaction energy analysis for selected dimers extracted from the crystal of DIMI.

|      |         | Electrostatic | Repulsion | Dispersion | Total         |
|------|---------|---------------|-----------|------------|---------------|
| DIMI | Dimer-1 | 0.08          | 11.24     | -16.15     | -4.83 kJ/mol  |
|      | Dimer-2 | -1.06         | 18.16     | -11.69     | 5.41 kJ/mol   |
|      | Dimer-3 | 2.10          | 13.62     | -32.22     | -16.50 kJ/mol |
|      | Dimer-4 | -1.54         | 44.45     | -18.66     | 24.25 kJ/mol  |
|      | Dimer-5 | 0.07          | 9.86      | -25.96     | -16.03 kJ/mol |

Table S5. Intermolecular interaction energy analysis for selected dimers extracted from the crystal of DTSI.

|      |         | Electrostatic | Repulsion | Dispersion | Total        |
|------|---------|---------------|-----------|------------|--------------|
| DTSI | Dimer-1 | -1.80         | 2.66      | -7.95      | -7.09 kJ/mol |

|         |       |       |        |               |
|---------|-------|-------|--------|---------------|
| Dimer-2 | -5.06 | 3.33  | -12.43 | -14.16 kJ/mol |
| Dimer-3 | -3.13 | 20.99 | -42.06 | -24.21 kJ/mol |
| Dimer-4 | -0.77 | 3.33  | -8.69  | -6.13 kJ/mol  |
| Dimer-5 | 0.29  | 38.48 | -30.21 | 8.56 kJ/mol   |

Table S6. Intermolecular interaction energy analysis for selected dimers extracted from the crystal of MTSI.

|              | Electrostatic | Repulsion | Dispersion | Total         |
|--------------|---------------|-----------|------------|---------------|
| Dimer-1      | -5.84         | 12.59     | -26.22     | -19.47 kJ/mol |
| Dimer-2      | -2.44         | 64.89     | -20.46     | 41.99 kJ/mol  |
| MTSI Dimer-3 | -4.81         | 13.75     | -30.91     | -21.97 kJ/mol |
| Dimer-4      | -2.90         | 1.79      | -9.92      | -11.03 kJ/mol |
| Dimer-5      | 3.14          | 2.33      | -8.83      | -3.37 kJ/mol  |

Table S7. Intermolecular interaction energy analysis for selected dimers extracted from the crystal of 2MIP.

|              | Electrostatic | Repulsion | Dispersion | Total         |
|--------------|---------------|-----------|------------|---------------|
| Dimer-1      | -2.84         | 9.08      | -23.32     | -17.08 kJ/mol |
| Dimer-2      | -0.93         | 21.61     | -36.47     | -15.78 kJ/mol |
| 2MIP Dimer-3 | -4.75         | 34.79     | -69.00     | -38.95 kJ/mol |
| Dimer-4      | -0.90         | 21.61     | -36.47     | -15.76 kJ/mol |
| Dimer-5      | -0.65         | 3.46      | -12.01     | -9.20 kJ/mol  |

Table S8. Intermolecular interaction energy analysis for selected dimers extracted from the crystal of 2BMIP.

|               | Electrostatic | Repulsion | Dispersion | Total         |
|---------------|---------------|-----------|------------|---------------|
| Dimer-1       | -6.18         | 9.51      | -26.94     | -23.61 kJ/mol |
| Dimer-2       | 1.76          | 18.28     | -49.43     | -29.38 kJ/mol |
| 2BMIP Dimer-3 | 3.58          | 33.60     | -54.94     | -17.76 kJ/mol |
| Dimer-4       | -0.72         | 6.21      | -14.79     | -9.31 kJ/mol  |

|         |       |      |        |               |
|---------|-------|------|--------|---------------|
| Dimer-5 | -6.17 | 9.50 | -26.92 | -23.59 kJ/mol |
|---------|-------|------|--------|---------------|

Table S9. Mulliken charges for dimer-2 extracted from the crystal of SI.

|     |           |     |           |
|-----|-----------|-----|-----------|
| O1  | -0.200976 | O13 | -0.200931 |
| C2  | 0.026596  | C14 | 0.026417  |
| N3  | 0.025064  | N15 | 0.025165  |
| C4  | 0.159889  | C16 | 0.160584  |
| C5  | 0.032085  | H17 | 0.038249  |
| H6  | 0.038216  | C18 | 0.032465  |
| H7  | -0.012568 | H19 | -0.013003 |
| H8  | -0.015682 | C20 | 0.157577  |
| C9  | 0.157596  | H21 | -0.015643 |
| O10 | -0.183458 | O22 | -0.184179 |
| H11 | -0.012472 | H23 | -0.012434 |
| H12 | -0.014289 | H24 | -0.014266 |

Table S10. Mulliken charges for dimer-4 extracted from the crystal of DBMI.

|     |           |      |           |
|-----|-----------|------|-----------|
| Br1 | 0.067654  | H11  | 0.041291  |
| C2  | -0.115253 | N12  | -0.032496 |
| C3  | -0.118026 | C13  | 0.166436  |
| C4  | 0.178083  | C14  | 0.178595  |
| C5  | 0.166571  | O15  | -0.121318 |
| Br6 | 0.074873  | C16  | -0.117887 |
| N7  | -0.032291 | O17  | -0.142441 |
| O8  | -0.141643 | C18  | -0.114805 |
| O9  | -0.121276 | Br19 | 0.074741  |
| H10 | 0.041308  | Br20 | 0.067883  |

Table S11. Mulliken charges for dimer-2 extracted from the crystal of DIMI.

|     |           |     |           |
|-----|-----------|-----|-----------|
| I1  | 0.159751  | O11 | -0.121058 |
| C2  | -0.212702 | C12 | 0.192760  |
| C3  | 0.192978  | N13 | -0.039779 |
| C4  | -0.227230 | C14 | -0.227097 |
| N5  | -0.039630 | C15 | 0.192829  |
| O6  | -0.142642 | H16 | 0.041912  |
| I7  | 0.155606  | I17 | 0.155757  |
| C8  | 0.192924  | C18 | -0.212860 |
| H9  | 0.041969  | O19 | -0.142111 |
| O10 | -0.121023 | I20 | 0.159647  |

Table S12. Mulliken charges for dimer-4 extracted from the crystal of DIMI.

|     |           |     |           |
|-----|-----------|-----|-----------|
| I1  | 0.159751  | O11 | -0.143091 |
| C2  | -0.212702 | C12 | 0.192967  |
| C3  | 0.192978  | N13 | -0.039275 |
| C4  | -0.227230 | C14 | -0.212448 |
| N5  | -0.039630 | H15 | 0.042314  |
| O6  | -0.142642 | C16 | 0.192812  |
| I7  | 0.155606  | I17 | 0.159679  |
| C8  | 0.192924  | C18 | -0.227363 |
| H9  | 0.041969  | O19 | -0.121373 |
| O10 | -0.121023 | I20 | 0.155777  |

Table S13. Mulliken charges for dimer-5 extracted from the crystal of DTSL.

|    |           |     |           |
|----|-----------|-----|-----------|
| H1 | -0.014890 | S13 | -0.160432 |
| C2 | 0.229000  | C14 | -0.129501 |
| H3 | -0.014890 | N15 | 0.133894  |
| C4 | -0.129792 | C16 | 0.228555  |
| C5 | 0.233161  | H17 | 0.020084  |



|     |           |     |           |
|-----|-----------|-----|-----------|
| S6  | -0.160552 | C18 | -0.118723 |
| N7  | 0.133796  | H19 | -0.014899 |
| H8  | -0.015077 | H20 | -0.014899 |
| H9  | -0.015077 | C21 | 0.233083  |
| C10 | -0.118764 | S22 | -0.147017 |
| H11 | 0.020081  | H23 | -0.015073 |
| S12 | -0.146995 | H24 | -0.015073 |

Table S14. Mulliken charges for dimer-2 extracted from the crystal of MTSI.

|     |           |     |           |
|-----|-----------|-----|-----------|
| S1  | -0.163523 | O13 | -0.189856 |
| C2  | -0.115166 | C14 | 0.023101  |
| N3  | 0.076983  | N15 | 0.076694  |
| C4  | 0.231432  | C16 | 0.171062  |
| C5  | 0.023201  | C17 | -0.114715 |
| H6  | 0.029267  | H18 | 0.029268  |
| C7  | 0.168947  | H19 | -0.009634 |
| H8  | -0.023526 | H20 | -0.018987 |
| H9  | -0.010171 | C21 | 0.229121  |
| O10 | -0.189555 | S22 | -0.163625 |
| H11 | -0.019048 | H23 | -0.022865 |
| H12 | -0.008840 | H24 | -0.009564 |

Table S15. Calculated SOC constants among  $S_0$ ,  $S_1$ ,  $T_1$ ,  $T_2$  and  $T_3$  for SI, DBMI, DIMI, MTSI, DTSI, 2MIP and 2BMIP in solid phase based on optimized  $S_1$ ,  $T_1$  and  $T_2$  structures, respectively.

|      | $\langle S_0   \hat{H}_{so}   T_1 \rangle$ | $\langle S_1   \hat{H}_{so}   T_1 \rangle$ | $\langle S_1   \hat{H}_{so}   T_2 \rangle$ | $\langle S_1   \hat{H}_{so}   T_3 \rangle$ |
|------|--------------------------------------------|--------------------------------------------|--------------------------------------------|--------------------------------------------|
| SI   | 19.906                                     | 1.174                                      | 16.639                                     | ----                                       |
| DBMI | 10.027                                     | 32.888                                     | 5.064                                      | 17.735                                     |
| DIMI | 6.366                                      | 1.027                                      | 5.545                                      | ----                                       |

|       |        |        |        |        |
|-------|--------|--------|--------|--------|
| DTSI  | 56.450 | 0.546  | 46.274 | 6.367  |
| MTSI  | 49.417 | 4.849  | 70.159 | ----   |
| 2MIP  | 0.339  | 0.984  | 4.269  | 8.678  |
| 2BMIP | 0.455  | 27.356 | 1.010  | 11.155 |

Table S16. Calculated SOC constants among  $S_0$ ,  $S_1$ ,  $T_1$ ,  $T_2$  and  $T_3$  for SI, DBMI, DIMI, MTSI, DTSI, 2MIP and 2BMIP in THF based on optimized  $S_1$  and  $T_1$  structures, respectively.

|       | $\langle S_0   \hat{H}_{so}   T_1 \rangle$ | $\langle S_1   \hat{H}_{so}   T_1 \rangle$ | $\langle S_1   \hat{H}_{so}   T_2 \rangle$ | $\langle S_1   \hat{H}_{so}   T_3 \rangle$ |
|-------|--------------------------------------------|--------------------------------------------|--------------------------------------------|--------------------------------------------|
| SI    | 20.117                                     | 1.235                                      | 3.705                                      | ----                                       |
| DBMI  | 0.693                                      | 24.765                                     | 25.669                                     | 14.424                                     |
| DIMI  | 6.997                                      | 0.049                                      | 0.225                                      | ----                                       |
| DTSI  | 58.973                                     | 0.121                                      | 28.842                                     | 6.110                                      |
| MTSI  | 49.852                                     | 3.644                                      | 71.090                                     | ----                                       |
| 2MIP  | 0.250                                      | 0.953                                      | 3.603                                      | 8.745                                      |
| 2BMIP | 1.379                                      | 0.787                                      | 3.024                                      | 13.969                                     |

Table S17. Contribution to the reorganization energies of the lowest singlet excited state ( $\lambda_1$ ), the triplet excited state ( $\lambda_2$ ), and both two states ( $\lambda_{all}$ ) of SI, DBMI, DIMI, MTSI, DTSI, 2MIP and 2BMIP in THF.

|       |                | $\lambda_1$ (cm <sup>-1</sup> ) | $\lambda_2$ (cm <sup>-1</sup> ) | $\lambda_{all}$ (cm <sup>-1</sup> ) |
|-------|----------------|---------------------------------|---------------------------------|-------------------------------------|
| SI    | T <sub>1</sub> | 112.84                          | 74.44                           | 187.28                              |
|       | T <sub>2</sub> | 2069.84                         | 881.23                          | 2951.07                             |
| ----- |                |                                 |                                 |                                     |
| DBMI  | T <sub>1</sub> | 1020.77                         | 987.70                          | 2008.47                             |
|       | T <sub>2</sub> | 233.82                          | 1660.20                         | 1894.02                             |
|       | T <sub>3</sub> | 17.74                           | 64.12                           | 81.86                               |
| ----- |                |                                 |                                 |                                     |
| DIMI  | T <sub>1</sub> | 989.39                          | 542.08                          | 1531.47                             |
|       | T <sub>2</sub> | 1081.58                         | 1462.19                         | 2543.77                             |
| ----- |                |                                 |                                 |                                     |
| DTSI  | T <sub>1</sub> | 81.30                           | 3.55                            | 84.85                               |
|       | T <sub>2</sub> | 395.37                          | 279.79                          | 675.16                              |
|       | T <sub>3</sub> | 395.37                          | 377.55                          | 772.92                              |

|       |                |         |         |         |
|-------|----------------|---------|---------|---------|
| MTSI  | T <sub>1</sub> | 152.76  | 68.48   | 221.24  |
|       | T <sub>2</sub> | 615.07  | 588.46  | 1203.53 |
| 2MIP  | T <sub>1</sub> | 966.65  | 2350.36 | 3317.01 |
|       | T <sub>2</sub> | 970.36  | 2632.65 | 3603.01 |
|       | T <sub>3</sub> | 843.49  | 1128.60 | 1972.09 |
| 2BMIP | T <sub>1</sub> | 1480.58 | 1129.57 | 2610.15 |
|       | T <sub>2</sub> | 3324.43 | 5342.17 | 8666.60 |
|       | T <sub>3</sub> | 1096.58 | 3917.81 | 5014.39 |

Table S18. Calculated adiabatic singlet and triplet energies, adiabatic singlet-triplet energy gap ( $\Delta E_{S_1-T_n}$ ) and ISC and RISC processes of SI, DBMI, DIMI, MTSI, DTSI, 2MIP and 2BMIP in solid phase.

|      |                | <b>E (eV)</b> | <b><math>\Delta E_{S_1-T_n}</math> (eV)</b> | <b><math>k_{ISC}</math> (s<sup>-1</sup>)</b> | <b><math>k_{RISC}</math> (s<sup>-1</sup>)</b> |
|------|----------------|---------------|---------------------------------------------|----------------------------------------------|-----------------------------------------------|
| SI   | S <sub>1</sub> | 4.624         | ----                                        | ----                                         | ----                                          |
|      | T <sub>1</sub> | 4.083         | 0.541                                       | 0                                            | 0                                             |
|      | T <sub>2</sub> | 4.521         | 0.103                                       | $1.77 \times 10^{11}$                        | $4.24 \times 10^9$                            |
| DBMI | S <sub>1</sub> | 3.265         | ----                                        | ----                                         | ----                                          |
|      | T <sub>1</sub> | 2.215         | 1.050                                       | $1.50 \times 10^8$                           | 0                                             |
|      | T <sub>2</sub> | 2.885         | 0.380                                       | 0                                            | 0                                             |
|      | T <sub>3</sub> | 3.252         | 0.013                                       | $1.72 \times 10^{11}$                        | $2.71 \times 10^{11}$                         |
| DIMI | S <sub>1</sub> | 3.130         | ----                                        | ----                                         | ----                                          |
|      | T <sub>1</sub> | 2.148         | 0.982                                       | 0                                            | 0                                             |
|      | T <sub>2</sub> | 2.845         | 0.285                                       | $9.21 \times 10^9$                           | $9.84 \times 10^1$                            |
| DTSI | S <sub>1</sub> | 2.608         | ----                                        | ----                                         | ----                                          |
|      | T <sub>1</sub> | 2.291         | 0.317                                       | 0                                            | 0                                             |
|      | T <sub>2</sub> | 2.510         | 0.098                                       | $1.88 \times 10^{12}$                        | $2.99 \times 10^{10}$                         |
|      | T <sub>3</sub> | 2.542         | 0.066                                       | $2.64 \times 10^{10}$                        | $3.23 \times 10^9$                            |
| MTSI | S <sub>1</sub> | 2.960         | ----                                        | ----                                         | ----                                          |
|      | T <sub>1</sub> | 2.589         | 0.371                                       | 0                                            | 0                                             |
|      | T <sub>2</sub> | 2.832         | 0.128                                       | $1.28 \times 10^{12}$                        | $4.28 \times 10^9$                            |
| 2MIP | S <sub>1</sub> | 3.184         | ----                                        | ----                                         | ----                                          |

|       |                |       |       |                       |                      |
|-------|----------------|-------|-------|-----------------------|----------------------|
|       | T <sub>1</sub> | 2.498 | 0.686 | 3.78×10 <sup>6</sup>  | 0                    |
|       | T <sub>2</sub> | 2.502 | 0.682 | 3.98×10 <sup>8</sup>  | 0                    |
|       | T <sub>3</sub> | 3.032 | 0.152 | 3.98×10 <sup>10</sup> | 1.19×10 <sup>8</sup> |
|       | S <sub>1</sub> | 3.123 | ----  | ----                  | ----                 |
| 2BMIP | T <sub>1</sub> | 2.360 | 0.763 | 6.30×10 <sup>9</sup>  | 0                    |
|       | T <sub>2</sub> | 2.361 | 0.762 | 2.58×10 <sup>7</sup>  | 0                    |
|       | T <sub>3</sub> | 2.976 | 0.147 | 5.53×10 <sup>10</sup> | 9.48×10 <sup>7</sup> |

Table S19. Calculated adiabatic singlet and triplet energies, adiabatic singlet-triplet energy gap ( $\Delta E_{S_1-T_n}$ ) and ISC and RISC processes of SI, DBMI, DIMI, MTSI, DTSI, 2MIP and 2BMIP in THF.

|      |                | E (eV) | $\Delta E_{S_1-T_n}$ (eV) | $k_{ISC}$ (s <sup>-1</sup> ) | $k_{RISC}$ (s <sup>-1</sup> ) |
|------|----------------|--------|---------------------------|------------------------------|-------------------------------|
| SI   | S <sub>1</sub> | 4.643  | ----                      | ----                         | ----                          |
|      | T <sub>1</sub> | 4.102  | 0.54                      | 0                            | 0                             |
|      | T <sub>2</sub> | 4.572  | 0.07                      | 9.44×10 <sup>9</sup>         | 1.18×10 <sup>8</sup>          |
| DBMI | S <sub>1</sub> | 3.274  | ----                      | ----                         | ----                          |
|      | T <sub>1</sub> | 2.216  | 1.06                      | 0                            | 0                             |
|      | T <sub>2</sub> | 2.929  | 0.35                      | 1.50×10 <sup>11</sup>        | 3.83×10 <sup>-9</sup>         |
| DIMI | S <sub>1</sub> | 3.055  | ----                      | ----                         | ----                          |
|      | T <sub>1</sub> | 2.144  | 0.91                      | 0                            | 0                             |
|      | T <sub>2</sub> | 2.870  | 0.19                      | 3.06×10 <sup>7</sup>         | 2.15×10 <sup>4</sup>          |
| DTSI | S <sub>1</sub> | 2.654  | ----                      | ----                         | ----                          |
|      | T <sub>1</sub> | 2.350  | 0.30                      | 0                            | 0                             |
|      | T <sub>2</sub> | 2.542  | 0.11                      | 2.11×10 <sup>11</sup>        | 5.45×10 <sup>9</sup>          |
| MTSI | S <sub>1</sub> | 2.542  | 0.11                      | 1.82×10 <sup>10</sup>        | 2.45×10 <sup>8</sup>          |
|      | S <sub>1</sub> | 2.971  | ----                      | ----                         | ----                          |
|      | T <sub>1</sub> | 2.615  | 0.36                      | 0                            | 0                             |
| 2MIP | T <sub>2</sub> | 2.863  | 0.11                      | 4.10×10 <sup>12</sup>        | 6.16×10 <sup>10</sup>         |
|      | S <sub>1</sub> | 3.204  | ----                      | ----                         | ----                          |
|      | T <sub>1</sub> | 2.533  | 0.67                      | 3.53×10 <sup>6</sup>         | 0                             |

|       |                |       |      |                       |                      |
|-------|----------------|-------|------|-----------------------|----------------------|
|       | T <sub>2</sub> | 2.533 | 0.67 | 1.70×10 <sup>8</sup>  | 0                    |
|       | T <sub>3</sub> | 3.059 | 0.15 | 5.27×10 <sup>10</sup> | 1.84×10 <sup>8</sup> |
|       | S <sub>1</sub> | 3.108 | ---- | ----                  | ----                 |
| 2BMIP | T <sub>1</sub> | 2.326 | 0.78 | 1.59×10 <sup>-4</sup> | 0                    |
|       | T <sub>2</sub> | 2.621 | 0.49 | 1.84×10 <sup>9</sup>  | 1.91×10 <sup>1</sup> |
|       | T <sub>3</sub> | 2.869 | 0.24 | 2.14×10 <sup>10</sup> | 5.79×10 <sup>6</sup> |

Table S20. Reorganization energies (cm<sup>-1</sup>) between S<sub>0</sub> and T<sub>1</sub> for SI, DBMI, DIMI, MTSI, DTSI, 2MIP and 2BMIP from the bond length, bond angle, and dihedral angle in THF, respectively.

|       | Reorganization energy (cm <sup>-1</sup> ) |            |                |          |
|-------|-------------------------------------------|------------|----------------|----------|
|       | Bond length                               | Bond angle | Dihedral angle | Total    |
| SI    | 3857.17                                   | 225.77     | 7626.64        | 11709.58 |
| DBMI  | 4390.77                                   | 633.54     | 0.04           | 5024.35  |
| DIMI  | 3917.76                                   | 498.19     | 0.02           | 4415.97  |
| DTSI  | 622.10                                    | 31.22      | 16.12          | 669.44   |
| MTSI  | 1448.68                                   | 193.91     | 3080.90        | 4723.49  |
| 2MIP  | 5500.30                                   | 816.18     | 108.54         | 6425.02  |
| 2BMIP | 4801.52                                   | 710.83     | 110.23         | 5622.58  |
